# Supplementary material for: Stereoselective Synthesis and Application of Gibberellic Acid-Derived Aminodiols
Source: MDPI journal article supplement (doi:10.3390/ijms231810366), 2022-09-08
Supplement: s1 [file s1]

**Supporting information**  
**for**  
**Stereoselective Synthesis and Application of Gibberellic**  
**Acid-Derived Aminodiols**

**Zein Alabdeen Khdar <sup>1</sup>, Tam Minh Le <sup>1,2</sup>, Zsuzsanna Schelz <sup>3</sup>, István Zupkó <sup>3</sup> and Zsolt Szakonyi <sup>1,\*</sup>**

<sup>1</sup> Institute of Pharmaceutical Chemistry, University of Szeged, Interdisciplinary Excellent Center, Eötvös utca 6, H-6720 Szeged, Hungary

<sup>2</sup> Stereochemistry Research Group of the Hungarian Academy of Sciences, Eötvös utca 6, H-6720 Szeged, Hungary

<sup>3</sup> Institute of Pharmacodynamics and Biopharmacy, University of Szeged, Interdisciplinary Excellent Center, H-6720 Szeged, Hungary

\* Correspondence: szakonyi.zsolt@szte.hu

## Contents

|                                                                                              |             |
|----------------------------------------------------------------------------------------------|-------------|
| 1. Investigation of antiproliferative activity of gibberellic acid-based aminodiols<br>..... | S3 – S4     |
| 2. Investigation of antioxidant activity of gibberellic acid-based aminodiols<br>.....       | S5 – S6     |
| 3. $^1\text{H}$ -, $^{13}\text{C}$ - NMR spectra of new aminodiol derivatives                | S7 – S100   |
| 4. Docking study                                                                             | S101 – S102 |

# 1. Investigation of anti-proliferative activity of gibberellic acid -based aminodiols

Table S1. Anti-proliferative activity of gibberellic acid -based aminodiol derivatives

| Entry | Compounds | Concentration (μM)    | Growth inhibition (%) ± SEM |                    |                    |                    |                     |
|-------|-----------|-----------------------|-----------------------------|--------------------|--------------------|--------------------|---------------------|
|       |           |                       | HeLa                        | SiHa               | MDA-MB-231         | A2780              | NIH/3T3             |
| 1     | 4         | 10                    | 26.93 ± 1.55                | 23.34 ± 0.63       | < 20               | < 20               | n.d.                |
|       |           | 30                    | 25.90 ± 3.20                | 56.97 ± 1.16       | 31.65 ± 1.49       | 49.88 ± 1.76       |                     |
| 2     | 5         | 10                    | 22.33 ± 5.01                | < 20               | < 20               | 30.42 ± 0.22       |                     |
|       |           | 30                    | 51.04 ± 9.48                | 48.32 ± 4.04       | 64.91 ± 1.91       | 51.58 ± 2.69       |                     |
| 3     | 6         | 10                    | 21.36 ± 1.70                | < 20               | < 20               | 25.31 ± 0.27       |                     |
|       |           | 30                    | 63.14 ± 1.81                | 65.87 ± 2.48       | 85.10 ± 1.38       | 61.89 ± 1.25       |                     |
| 4     | 7         | 10                    | < 20                        | 28.91 ± 1.16       | < 20               | < 20               |                     |
|       |           | 30                    | 44.96 ± 0.97                | 94.29 ± 1.48       | 70.38 ± 0.07       | 65.04 ± 2.44       |                     |
| 5     | 8         | 10                    | 27.53 ± 0.41                | 29.68 ± 1.54       | < 20               | 39.47 ± 1.27       |                     |
|       |           | 30                    | 98.05 ± 0.07                | 98.38 ± 0.44       | 97.52 ± 0.67       | 96.38 ± 0.13       |                     |
| 6     | 9         | 10                    | < 20                        | 26.61 ± 1.02       | < 20               | < 20               |                     |
|       |           | 30                    | 30.62 ± 4.19                | 53.60 ± 1.92       | < 20               | 45.80 ± 1.62       |                     |
| 7     | 10        | 10                    | 38.52 ± 2.02                | 39.12 ± 1.82       | 31.20 ± 0.77       | 22.24 ± 1.93       |                     |
|       |           | 30                    | 97.93 ± 0.11                | 97.08 ± 0.08       | 94.51 ± 1.05       | 96.46 ± 0.76       |                     |
| 8     | 11        | 10                    | < 20                        | 30.70 ± 0.82       | < 20               | 31.69 ± 2.82       |                     |
|       |           | 30                    | 60.77 ± 2.44                | 53.74 ± 0.76       | 78.68 ± 1.47       | 53.40 ± 1.68       |                     |
| 9     | 12        | 10                    | 97.69 ± 0.28                | 97.41 ± 0.15       | 95.00 ± 0.69       | 96.29 ± 0.59       | 90.43 ± 0.15        |
|       |           | 30                    | 97.62 ± 0.55                | 97.06 ± 0.20       | 93.72 ± 0.88       | 96.28 ± 0.82       | 91.03 ± 0.05        |
|       |           | IC <sub>50</sub> (μM) | <b>4.14 ± 0.38</b>          | <b>4.17 ± 0.32</b> | <b>7.19 ± 1.48</b> | <b>5.45 ± 0.31</b> | <b>4.57 ± 0.23</b>  |
| 10    | 13        | 10                    | 97.16 ± 0.49                | 96.05 ± 0.46       | 94.86 ± 0.83       | 91.20 ± 1.96       | 40.50 ± 0.86        |
|       |           | 30                    | 96.87 ± 0.47                | 96.74 ± 0.27       | 96.00 ± 0.92       | 96.74 ± 1.17       | 88.10 ± 0.16        |
|       |           | IC <sub>50</sub> (μM) | <b>4.38 ± 0.08</b>          | <b>4.69 ± 0.17</b> | <b>7.49 ± 1.26</b> | <b>5.30 ± 0.41</b> | <b>10.88 ± 0.16</b> |
| 11    | 14        | 10                    | 98.08 ± 0.19                | 96.28 ± 2.13       | 96.57 ± 0.37       | 96.53 ± 0.73       | 88.58 ± 0.97        |
|       |           | 30                    | 97.40 ± 0.34                | 97.84 ± 0.42       | 96.77 ± 0.16       | 95.87 ± 1.06       | 88.65 ± 0.98        |
|       |           | IC <sub>50</sub> (μM) | <b>4.66 ± 0.21</b>          | <b>5.25 ± 0.86</b> | <b>8.04 ± 0.61</b> | <b>5.15 ± 0.28</b> | <b>5.02 ± 0.26</b>  |
| 12    | 15        | 10                    | 28.19 ± 0.88                | 28.61 ± 0.15       | < 20               | 21.91 ± 1.50       | n.d.                |
|       |           | 30                    | 96.70 ± 1.54                | 97.95 ± 0.63       | 95.96 ± 0.69       | 95.48 ± 0.65       |                     |
| 13    | 16        | 10                    | < 20                        | < 20               | < 20               | < 20               |                     |
|       |           | 30                    | 36.00 ± 2.89                | 22.96 ± 0.39       | 25.01 ± 0.99       | 21.55 ± 0.85       |                     |

|    |           |                       |              |              |              |              |              |
|----|-----------|-----------------------|--------------|--------------|--------------|--------------|--------------|
| 14 | 17        | 10                    | 40.84 ± 1.19 | < 20         | < 20         | < 20         |              |
|    |           | 30                    | 45.65 ± 1.48 | 47.13 ± 1.74 | 36.87 ± 1.58 | 78.87 ± 1.12 |              |
| 15 | 24        | 10                    | < 20         | < 20         | < 20         | < 20         |              |
|    |           | 30                    | 53.94 ± 2.21 | 31.90 ± 1.28 | 42.37 ± 1.46 | 34.15 ± 1.77 |              |
| 16 | 25        | 10                    | < 20         | < 20         | < 20         | < 20         |              |
|    |           | 30                    | < 20         | < 20         | < 20         | < 20         |              |
| 17 | 26        | 10                    | < 20         | < 20         | < 20         | < 20         |              |
|    |           | 30                    | < 20         | 25.88 ± 2.53 | < 20         | < 20         |              |
| 18 | 27        | 10                    | < 20         | 26.25 ± 0.46 | < 20         | < 20         |              |
|    |           | 30                    | 45.52 ± 1.87 | 44.44 ± 1.84 | < 20         | 28.86 ± 1.27 |              |
| 19 | 30        | 10                    | < 20         | < 20         | < 20         | < 20         |              |
|    |           | 30                    | < 20         | 29.52 ± 2.00 | < 20         | 26.76 ± 3.79 |              |
| 20 | 31        | 10                    | < 20         | < 20         | < 20         | < 20         |              |
|    |           | 30                    | 40.17 ± 5.59 | 42.92 ± 0.84 | 50.75 ± 3.01 | 41.40 ± 1.13 |              |
| 21 | 32        | 10                    | < 20         | < 20         | < 20         | < 20         |              |
|    |           | 30                    | < 20         | 31.00 ± 1.43 | < 20         | < 20         |              |
| 22 | 35        | 10                    | 40.15 ± 1.21 | 44.58 ± 0.74 | 29.39 ± 1.66 | 42.68 ± 2.63 |              |
|    |           | 30                    | 95.90 ± 2.21 | 98.41 ± 0.74 | 96.81 ± 0.82 | 95.40 ± 0.48 |              |
| 23 | 36        | 10                    | 31.09 ± 2.01 | 31.41 ± 1.21 | 46.86 ± 1.05 | 46.73 ± 1.46 |              |
|    |           | 30                    | 95.37 ± 2.87 | 97.69 ± 0.58 | 95.53 ± 0.83 | 94.81 ± 0.11 |              |
| 24 | 37        | 10                    | 35.80 ± 0.42 | 34.52 ± 1.89 | < 20         | 35.87 ± 0.89 |              |
|    |           | 30                    | 97.35 ± 0.69 | 97.58 ± 0.47 | 96.64 ± 0.17 | 96.05 ± 0.99 |              |
| 25 | 38        | 10                    | 26.85 ± 0.53 | 27.95 ± 0.93 | < 20         | 28.63 ± 2.66 |              |
|    |           | 30                    | 96.46 ± 1.72 | 97.63 ± 0.80 | 96.17 ± 0.76 | 95.23 ± 0.66 |              |
|    | Cisplatin | 10                    | 42.61 ± 2.33 | 88.64 ± 0.50 | 67.51 ± 1.01 | 83.57 ± 1.21 | 73.88 ± 1.63 |
|    |           | 30                    | 99.93 ± 0.26 | 90.18 ± 1.78 | 87.75 ± 1.10 | 95.02 ± 0.28 | 97.10 ± 0.15 |
|    |           | IC <sub>50</sub> (μM) | 12.43        | 7.84         | 3.74         | 1.30         | 5.49         |

n.d.: not determined

2. Figure S1 Investigation of antioxidant activity of gibberellic acid-based aminodiols. DPPH radical scavenging activity is represented by inhibition (%). Trolox (3,4-Dihydro-6-hydroxy-2,5,7,8-tetramethyl-2*H*-1-benzopyran-2-carboxylic acid) was used as reference antioxidant with a 20.15  $\mu\text{M}$   $\text{IC}_{50}$  value.

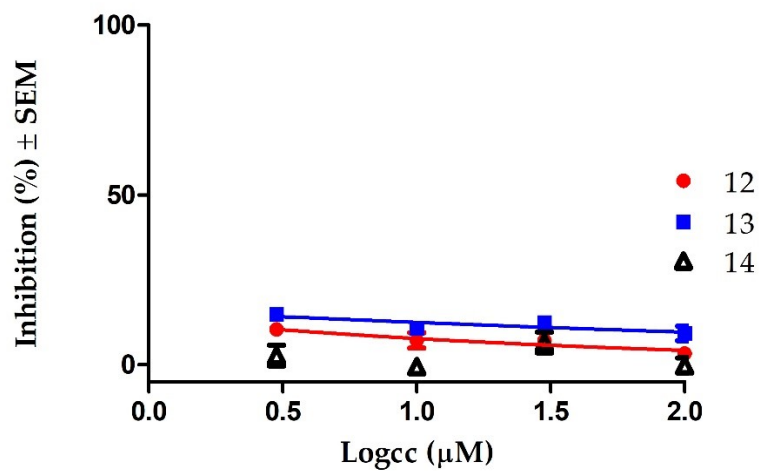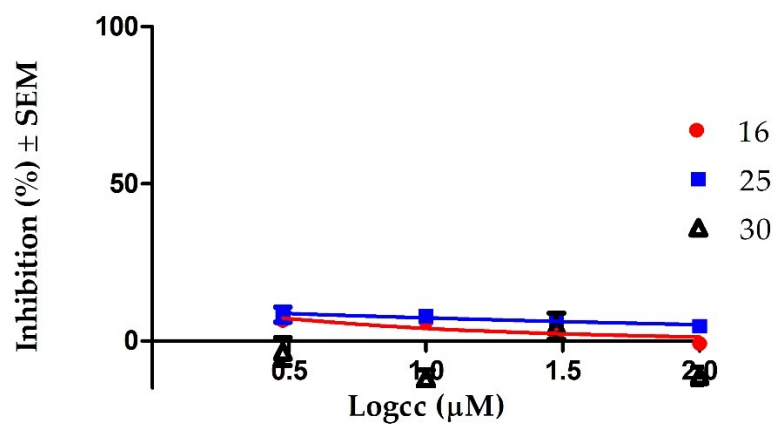

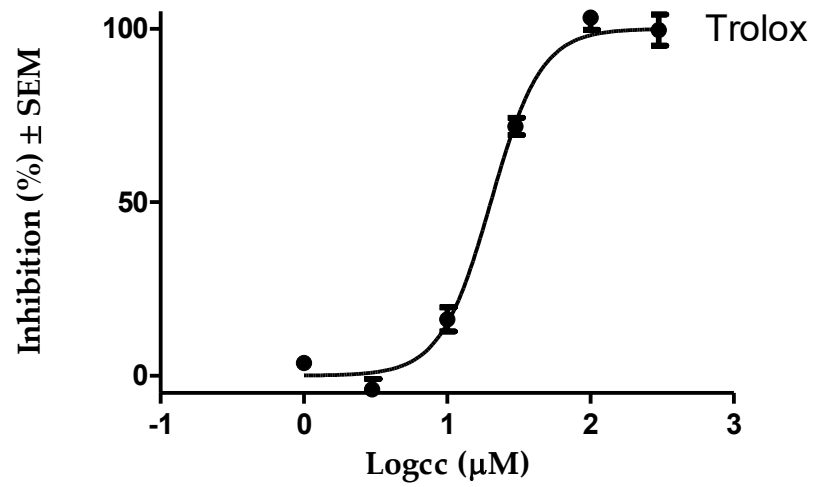

**Figure S 2:  $^1\text{H}$ -NMR of compound 2**

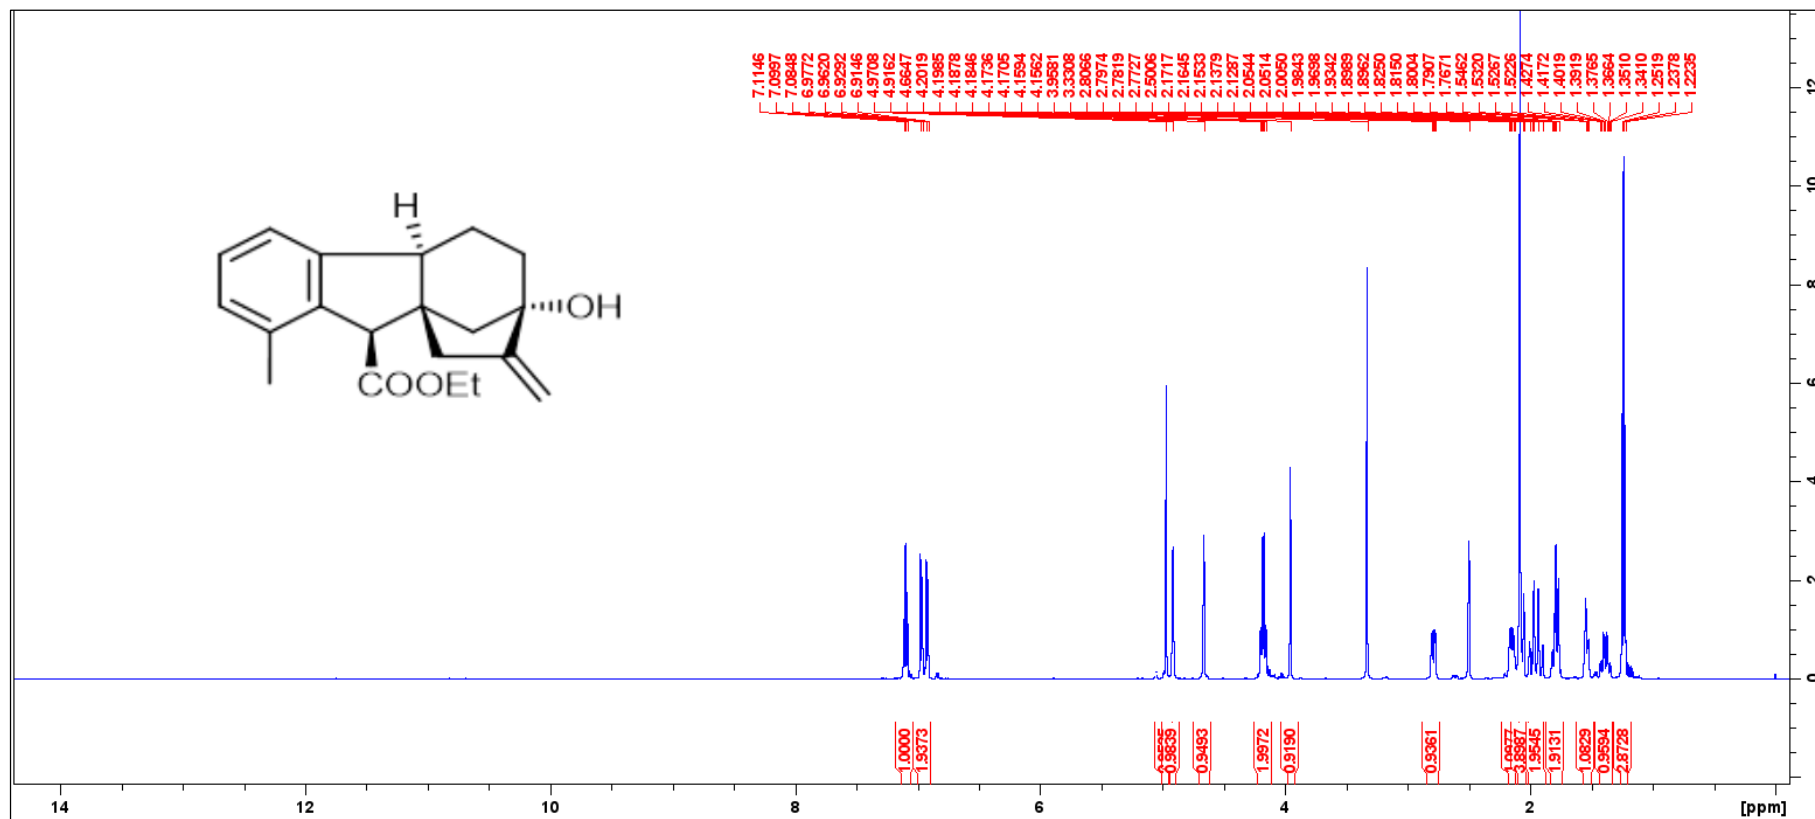

Figure S 3:  $^{13}\text{C}$ -NMR (JMOD) (JMOD) of compound 2

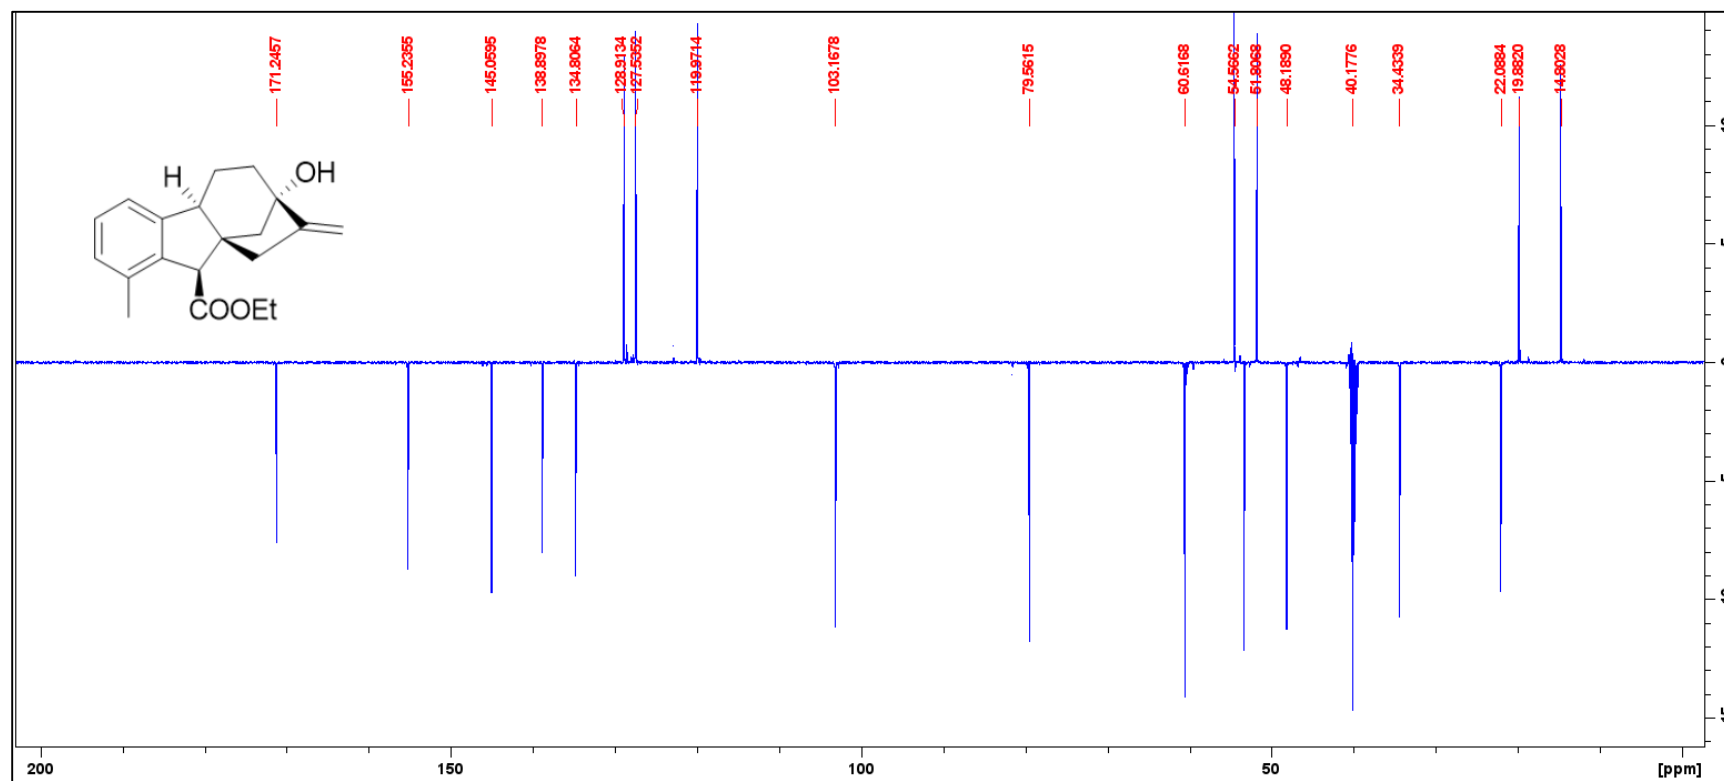



Figure S 4:  $^1\text{H}$ -NMR of compound 3

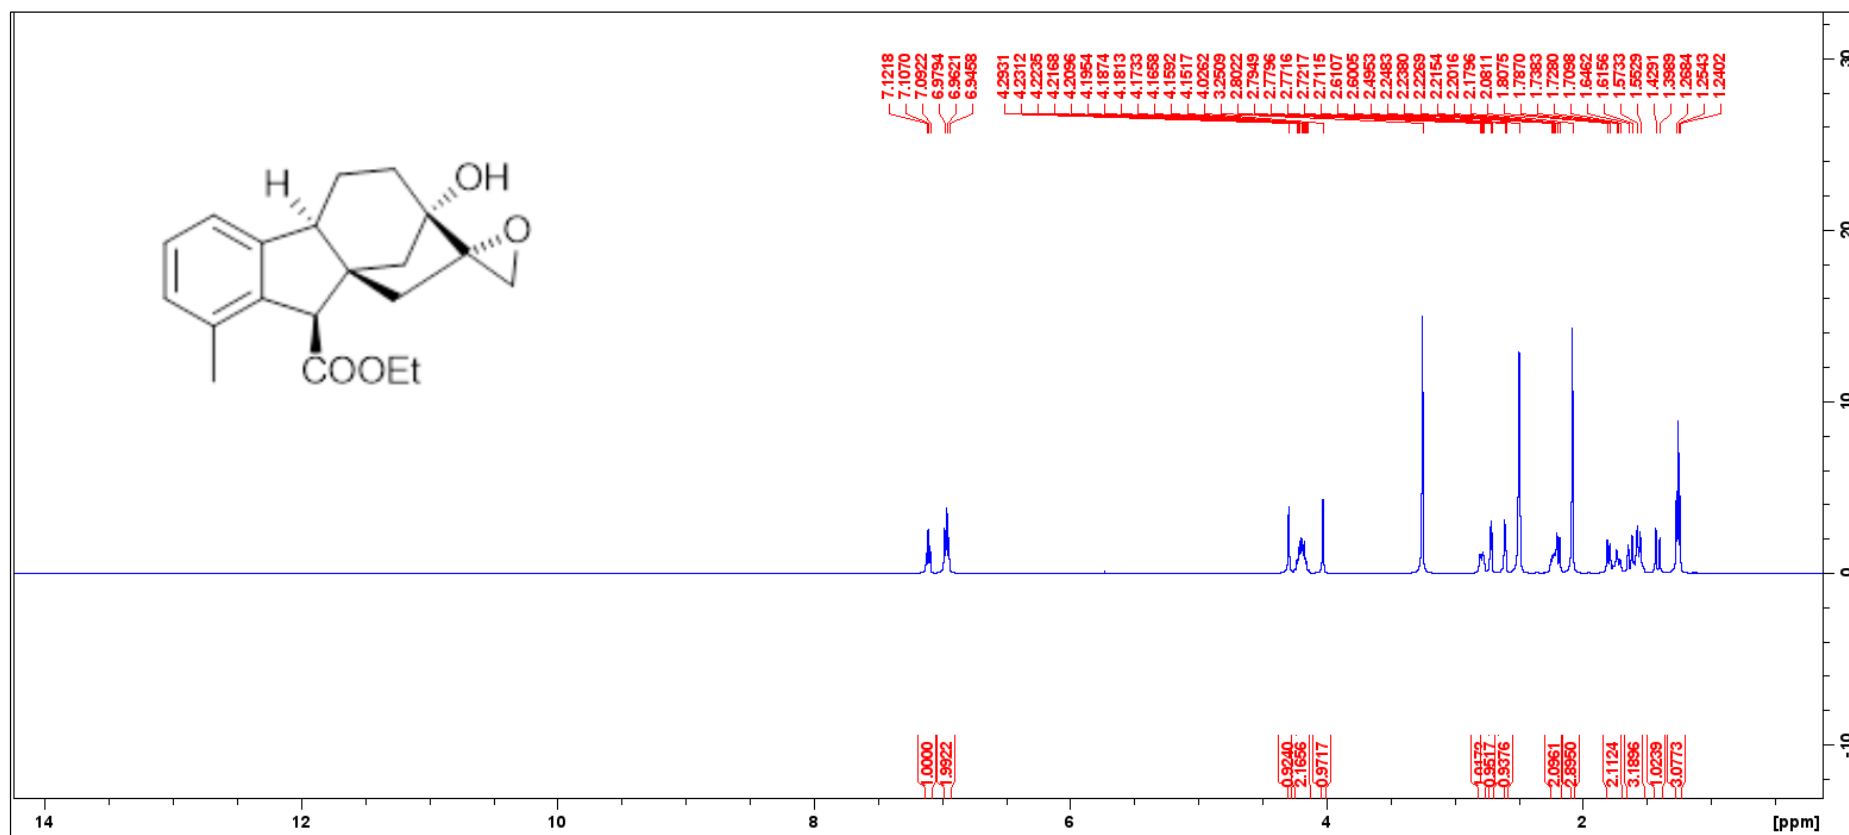

Figure S 5:  $^{13}\text{C}$ -NMR (JMOD) of compound 3

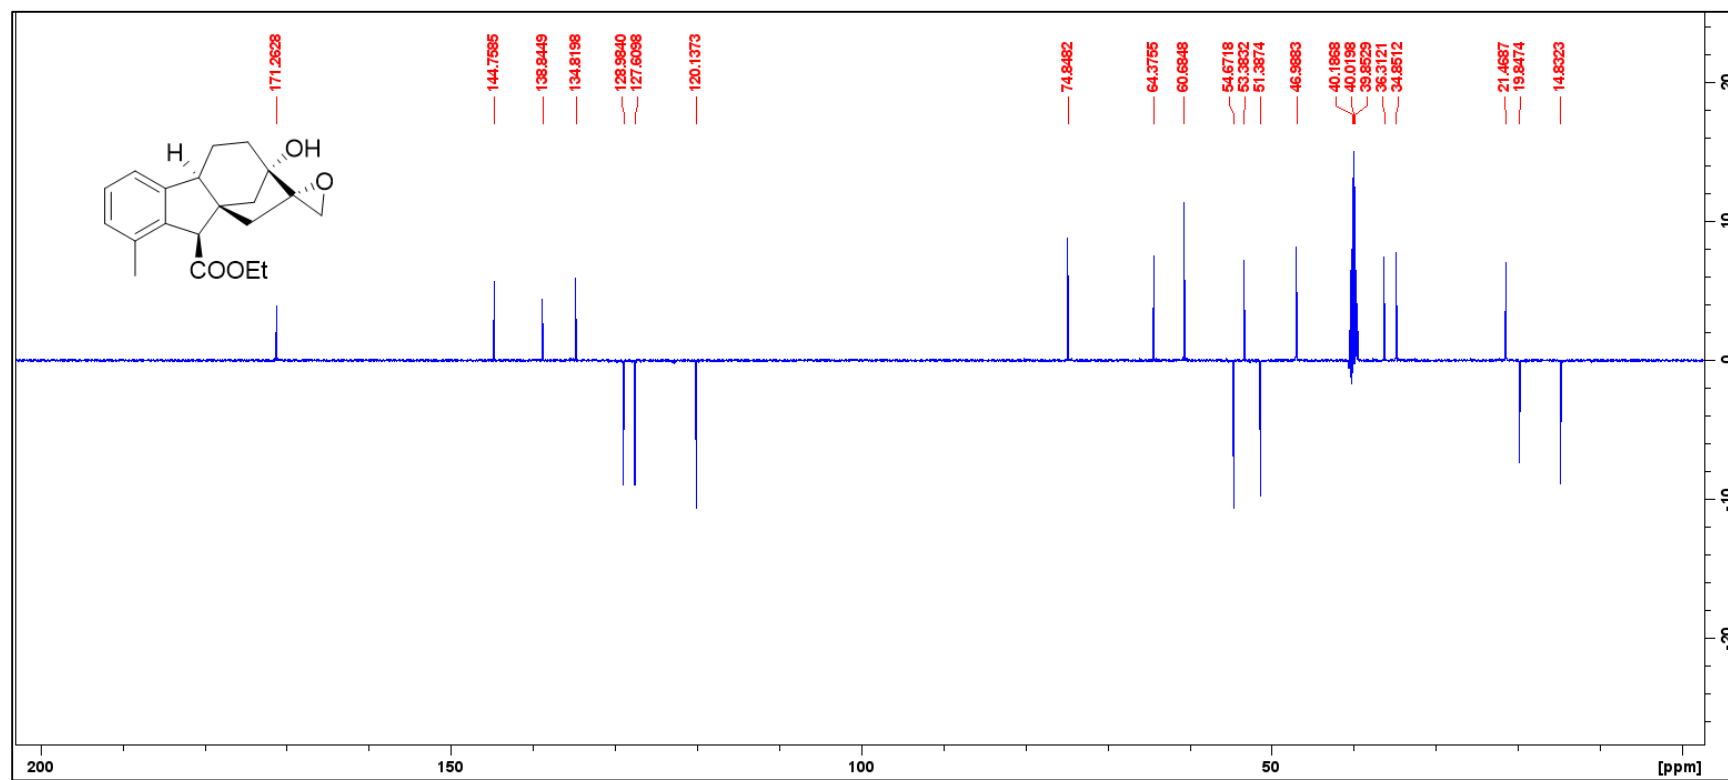

Figure S 6: COSY of compound 3

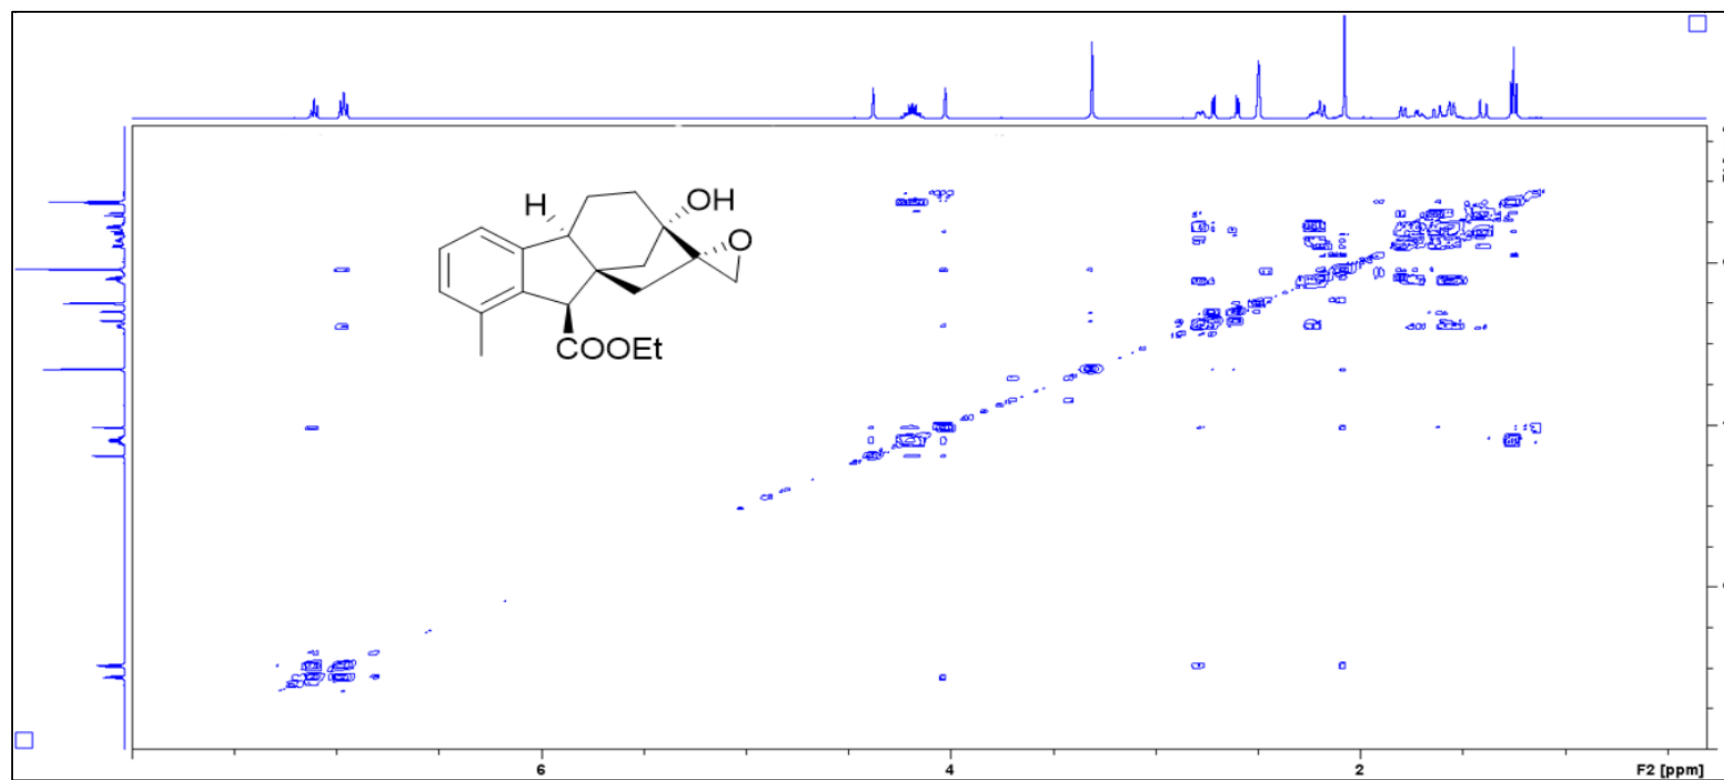

Figure S 7: NOESY of compound 3

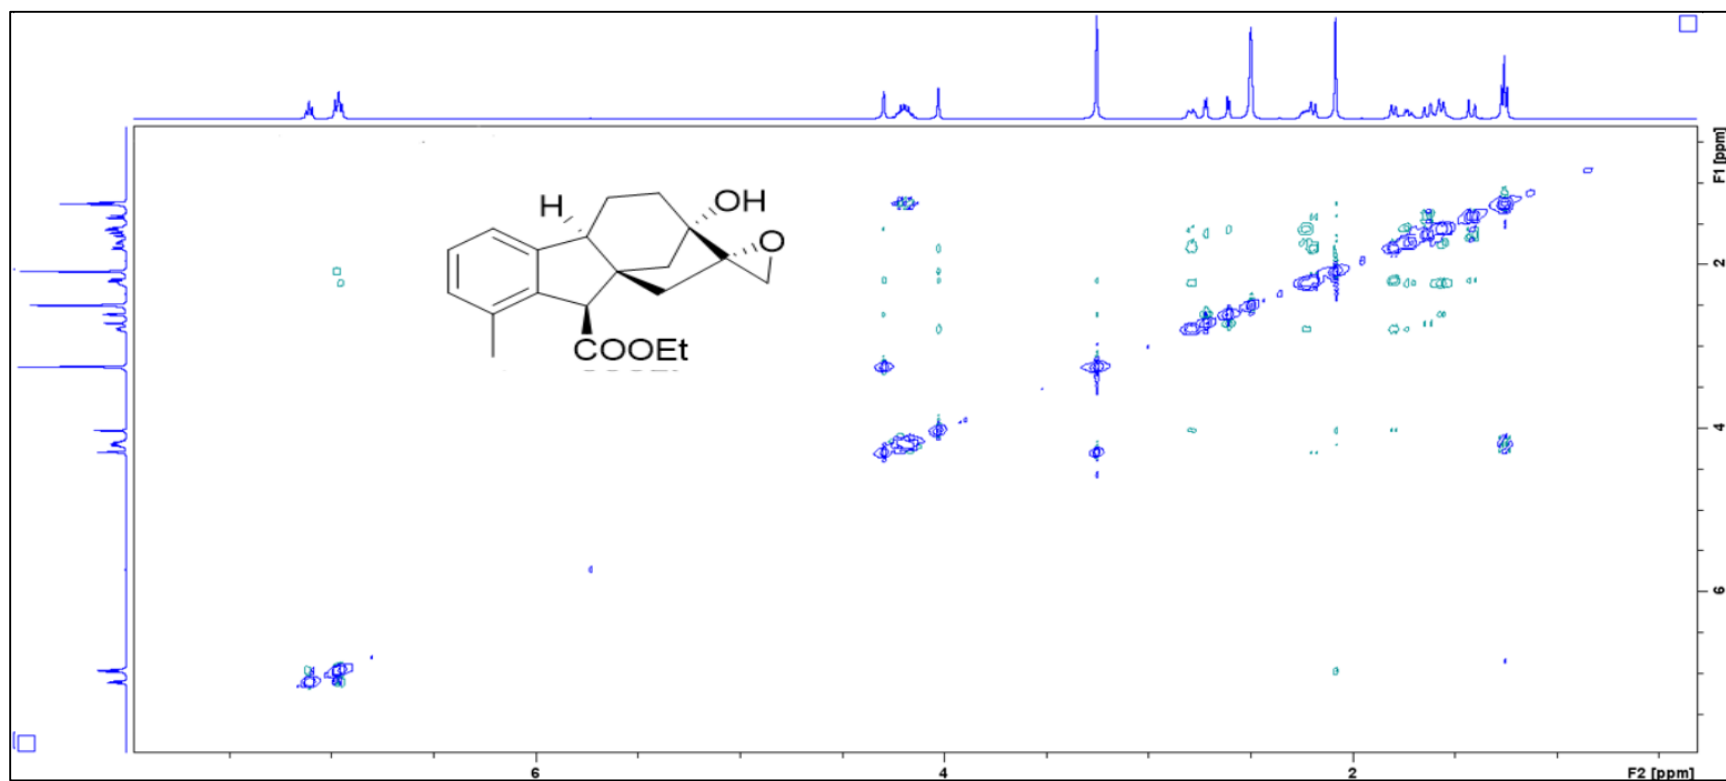

Figure S 8: <sup>1</sup>H-NMR of compound 4

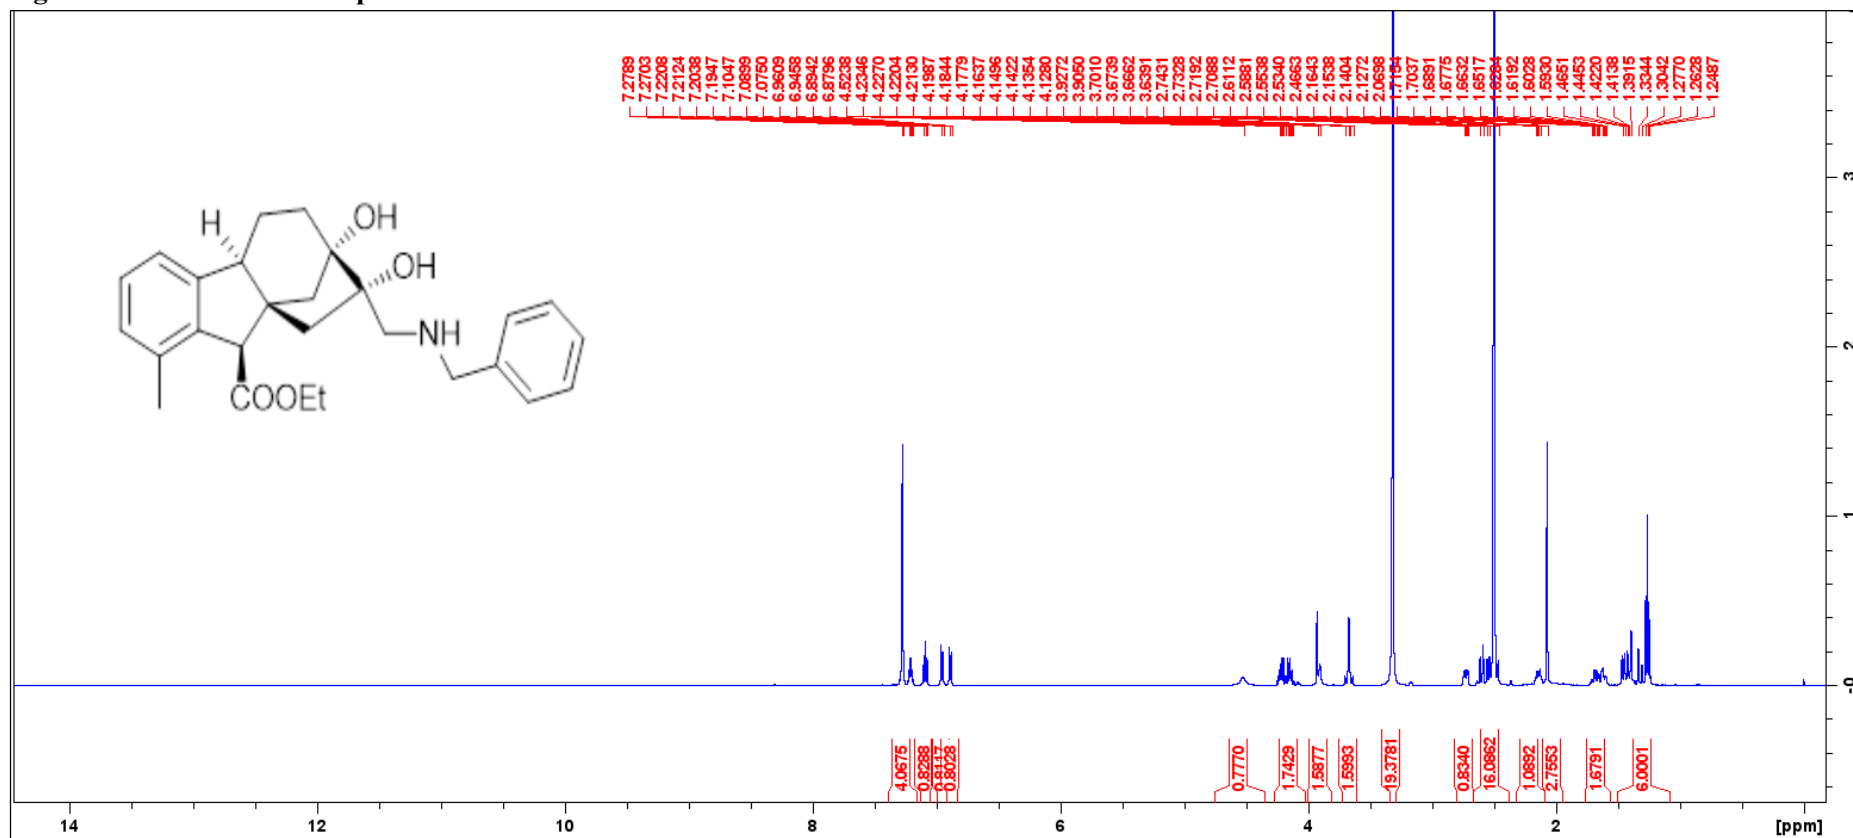

Figure S 9:  $^{13}\text{C}$ -NMR (JMOD) of compound 4

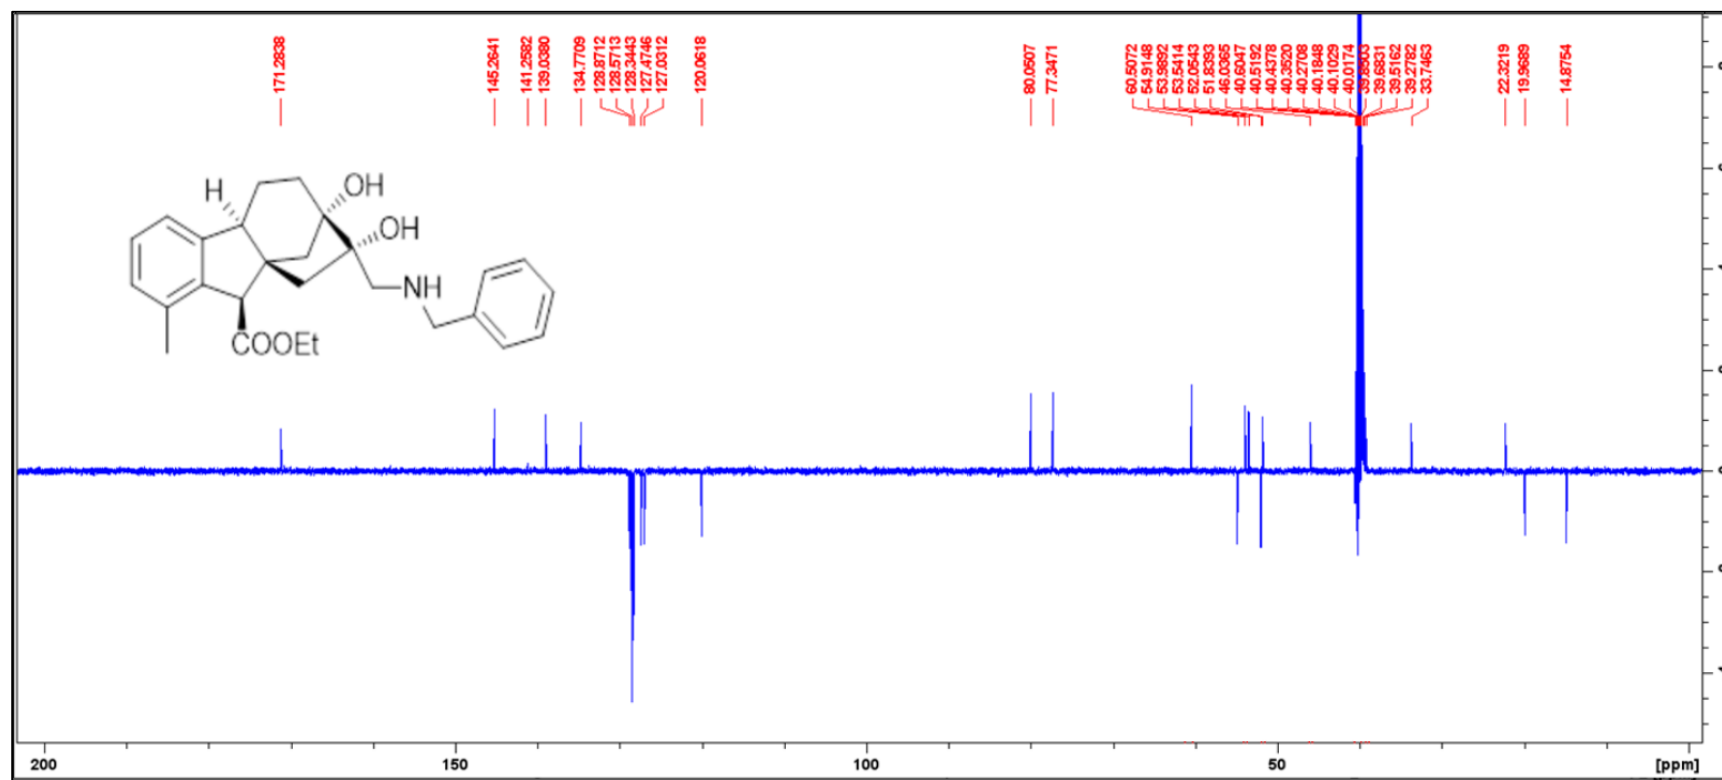

Figure S 10: COSY of compound 4

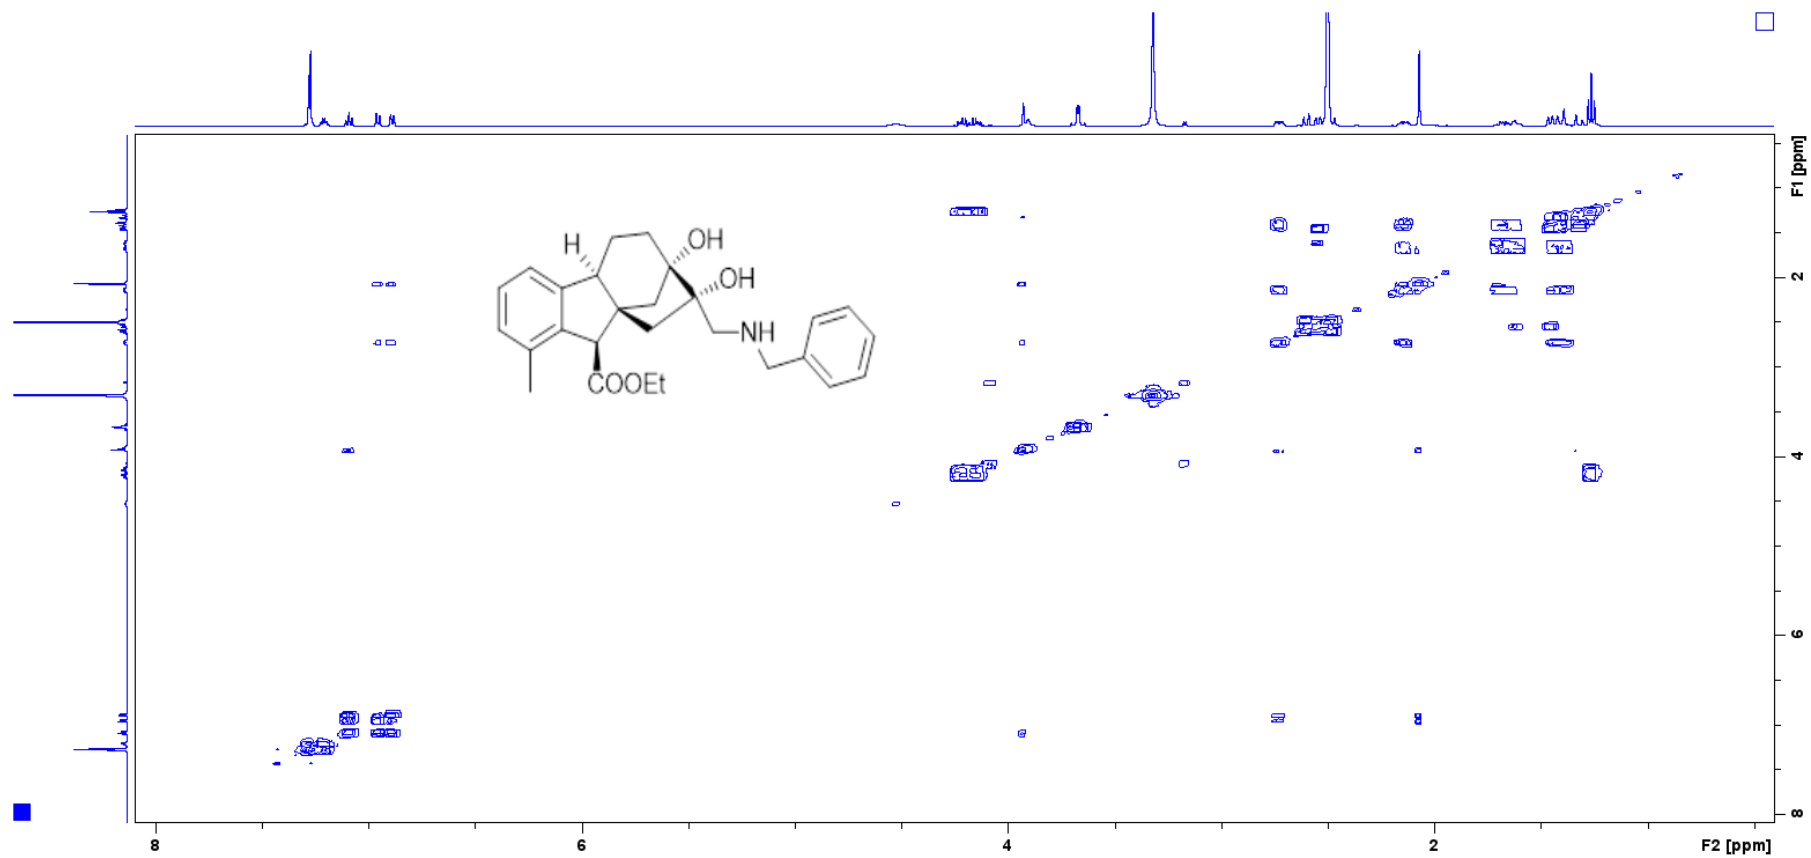

Figure S 11: NOESY of compound 4

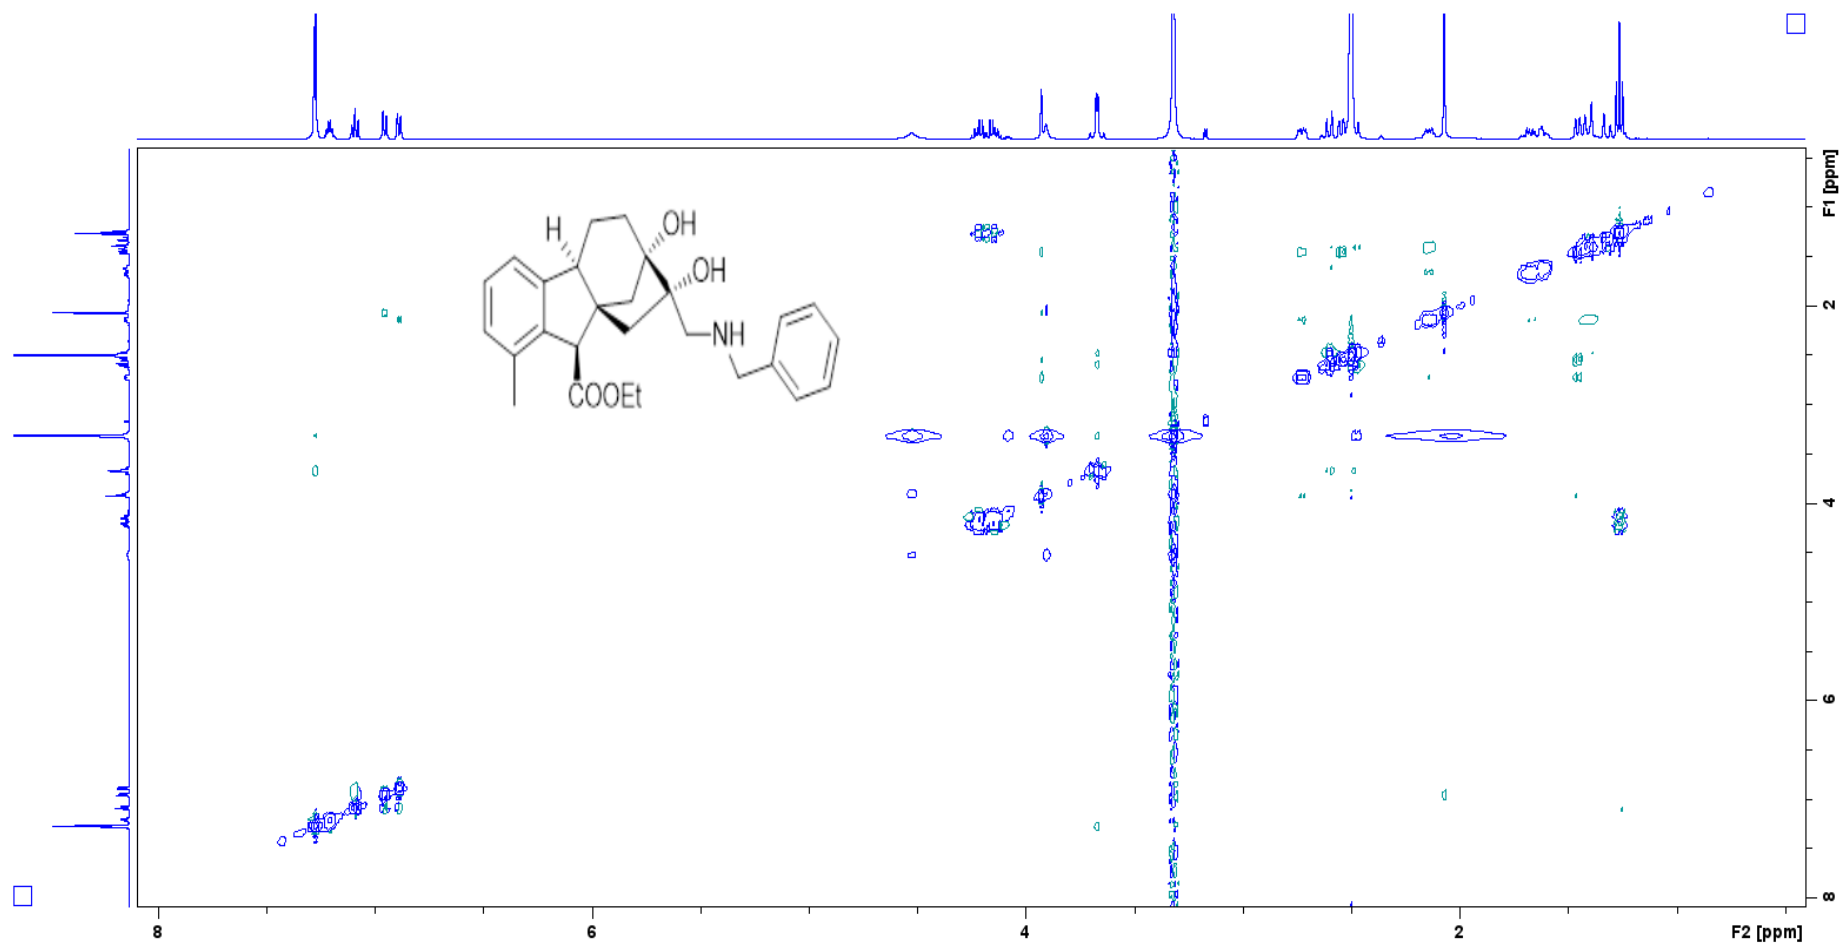



Figure S 12:  $^1\text{H}$ -NMR of compound 5

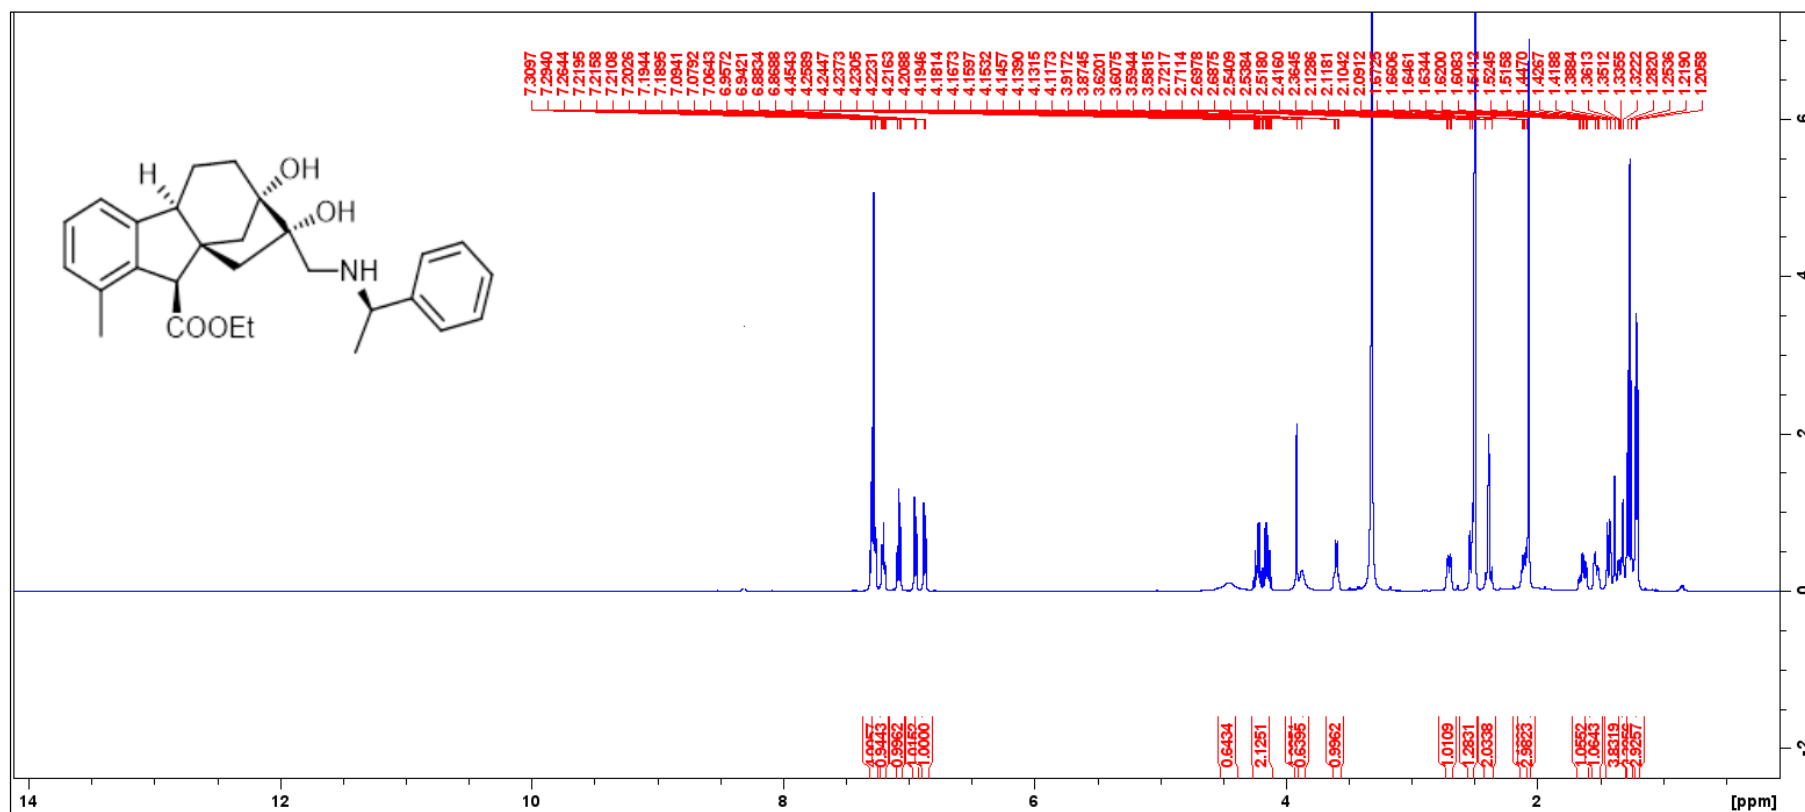

Figure S 13:  $^{13}\text{C}$ -NMR (JMOD) of compound 5

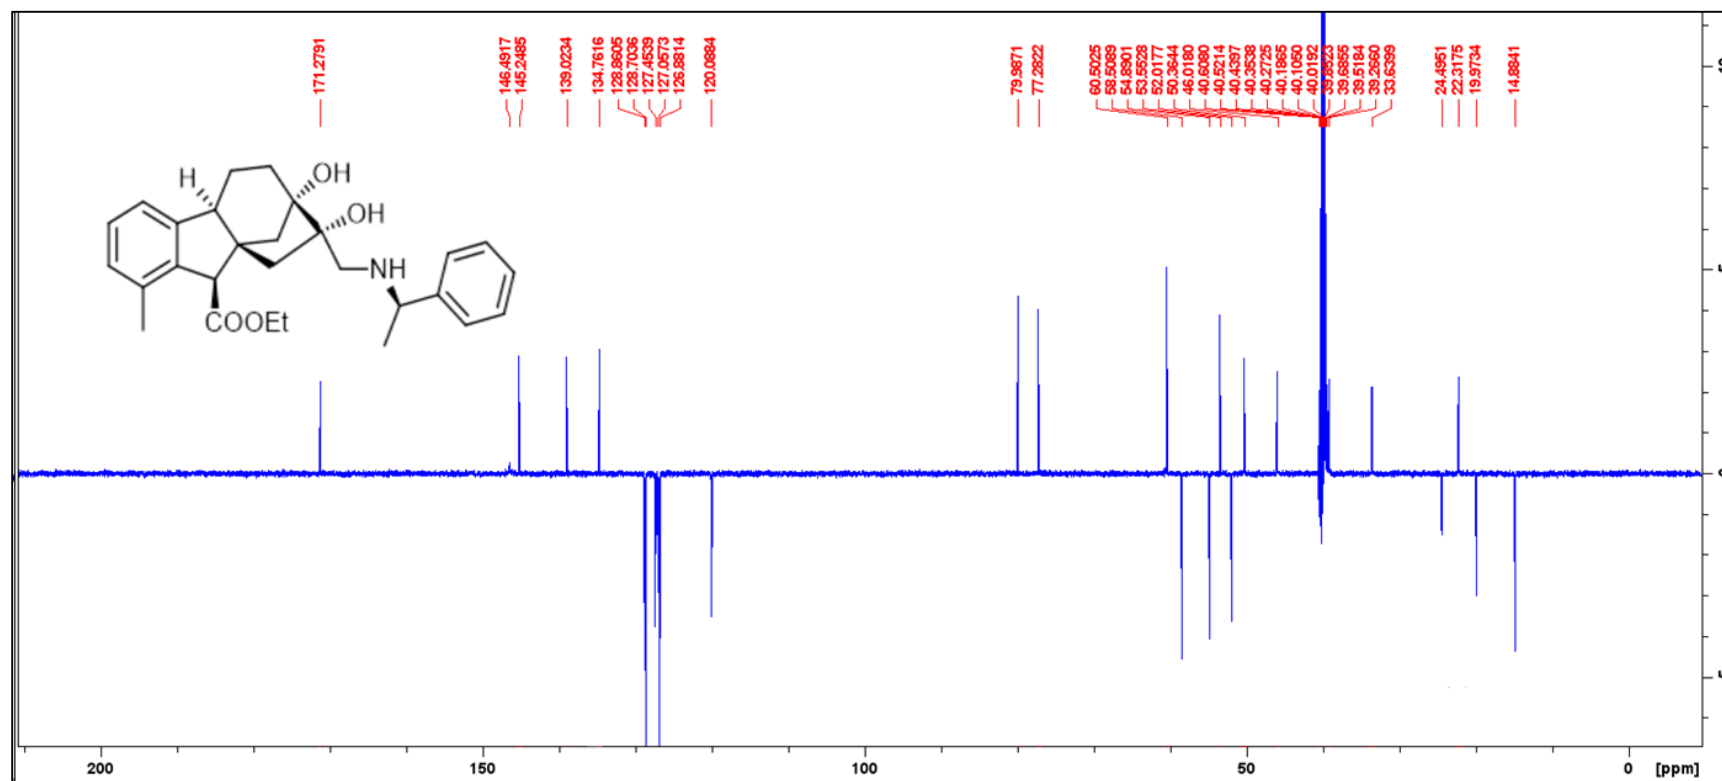

**Figure S 14:  $^1\text{H}$ -NMR of compound 6**

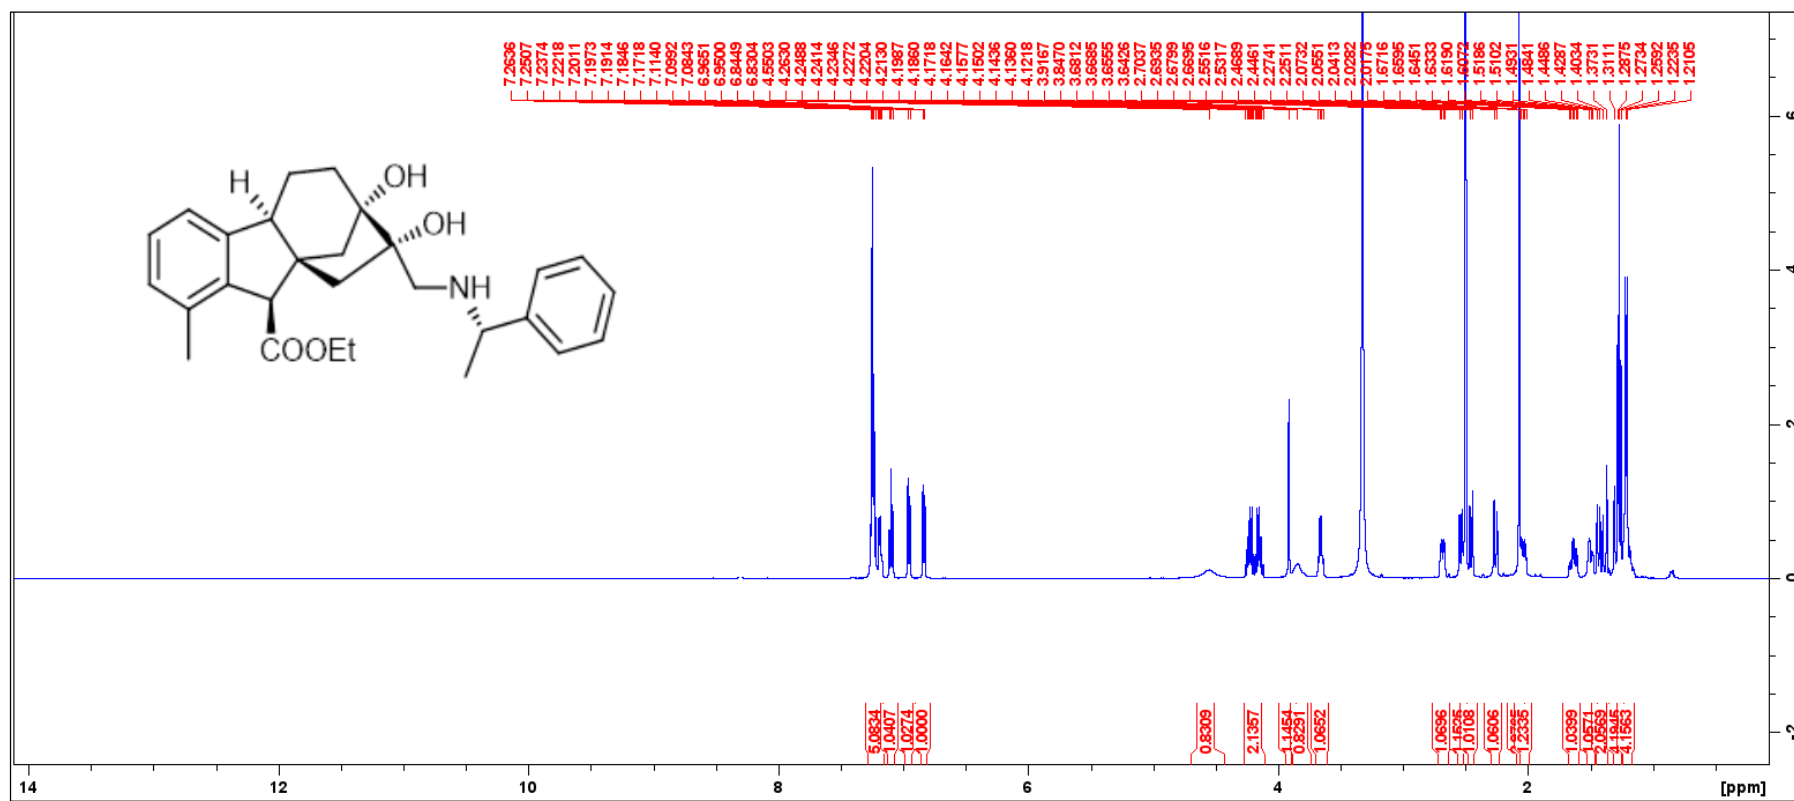

Figure S 15:  $^{13}\text{C}$ -NMR (JMOD) of compound 6

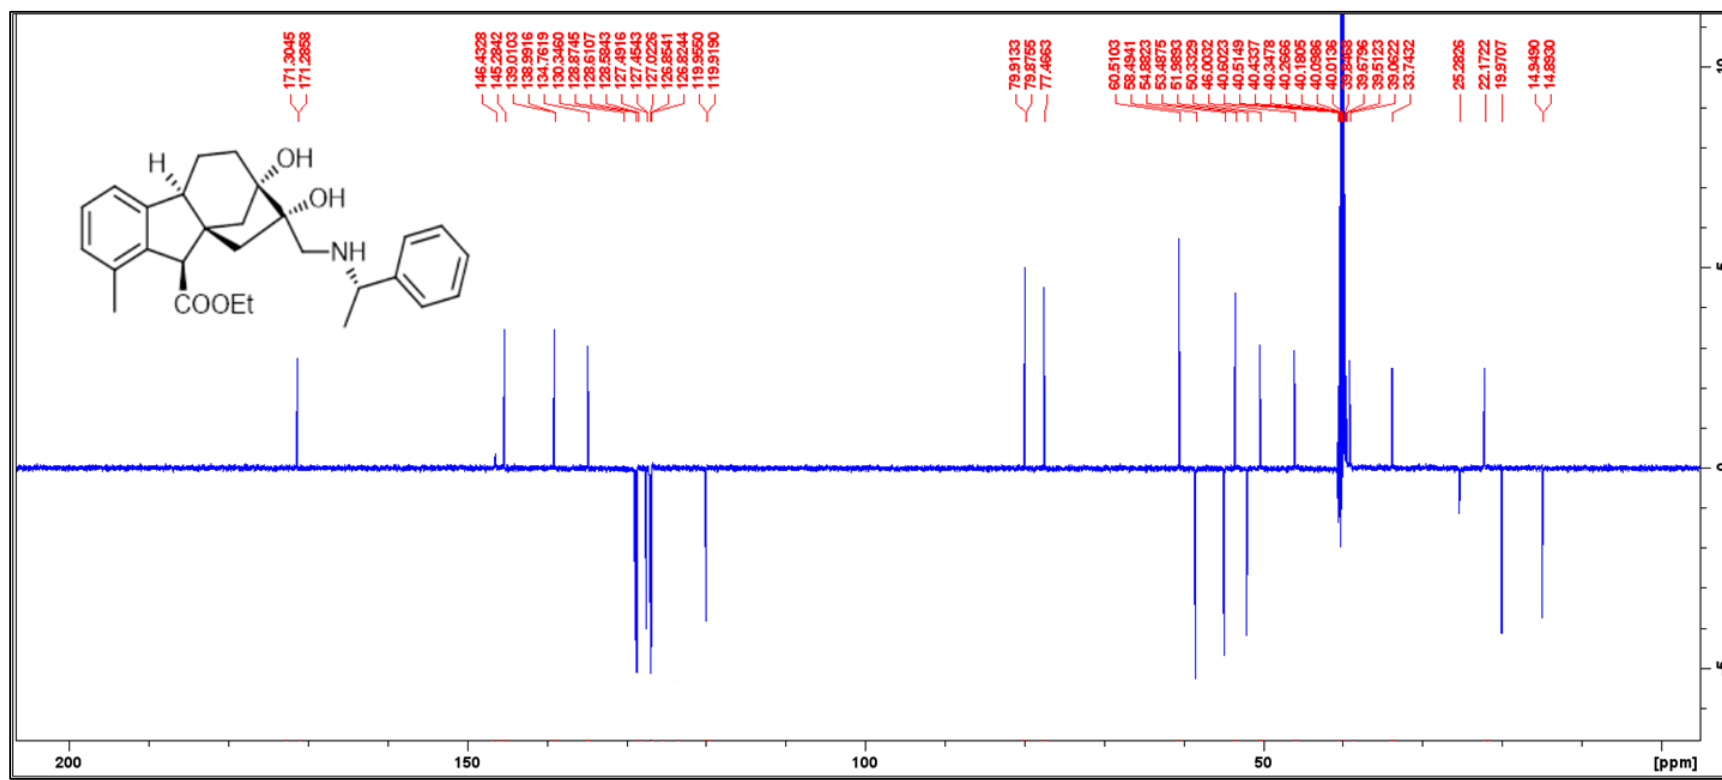

Figure S 16:  $^1\text{H}$ -NMR of compound 7

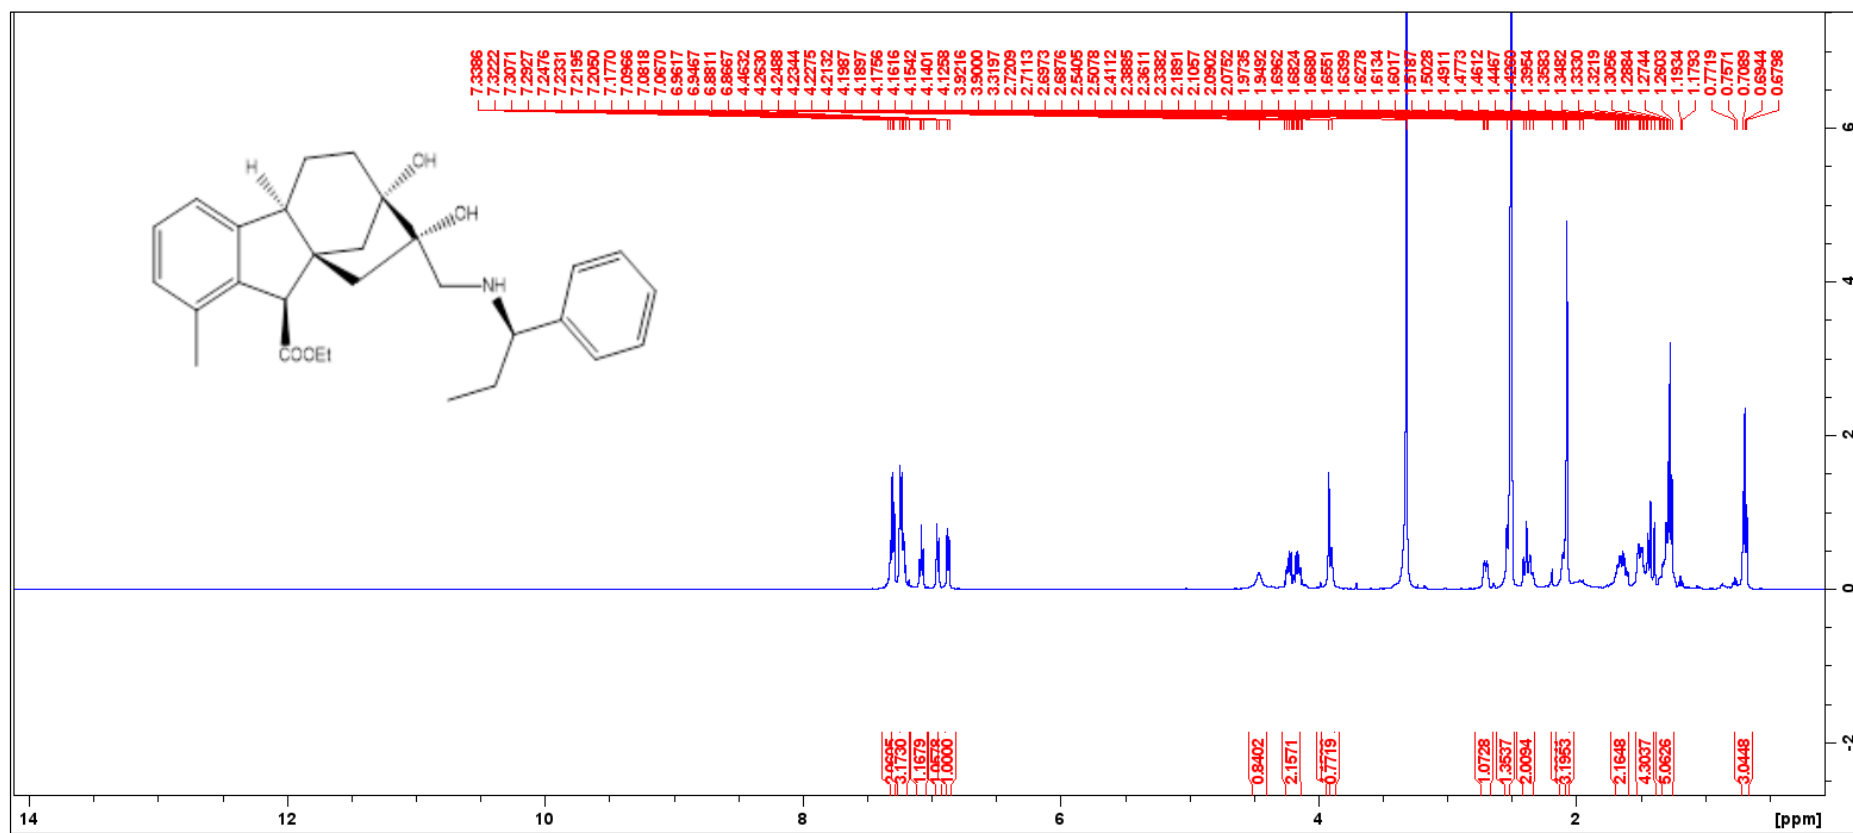

Figure S 17:  $^{13}\text{C}$ -NMR (JMOD) of compound 7

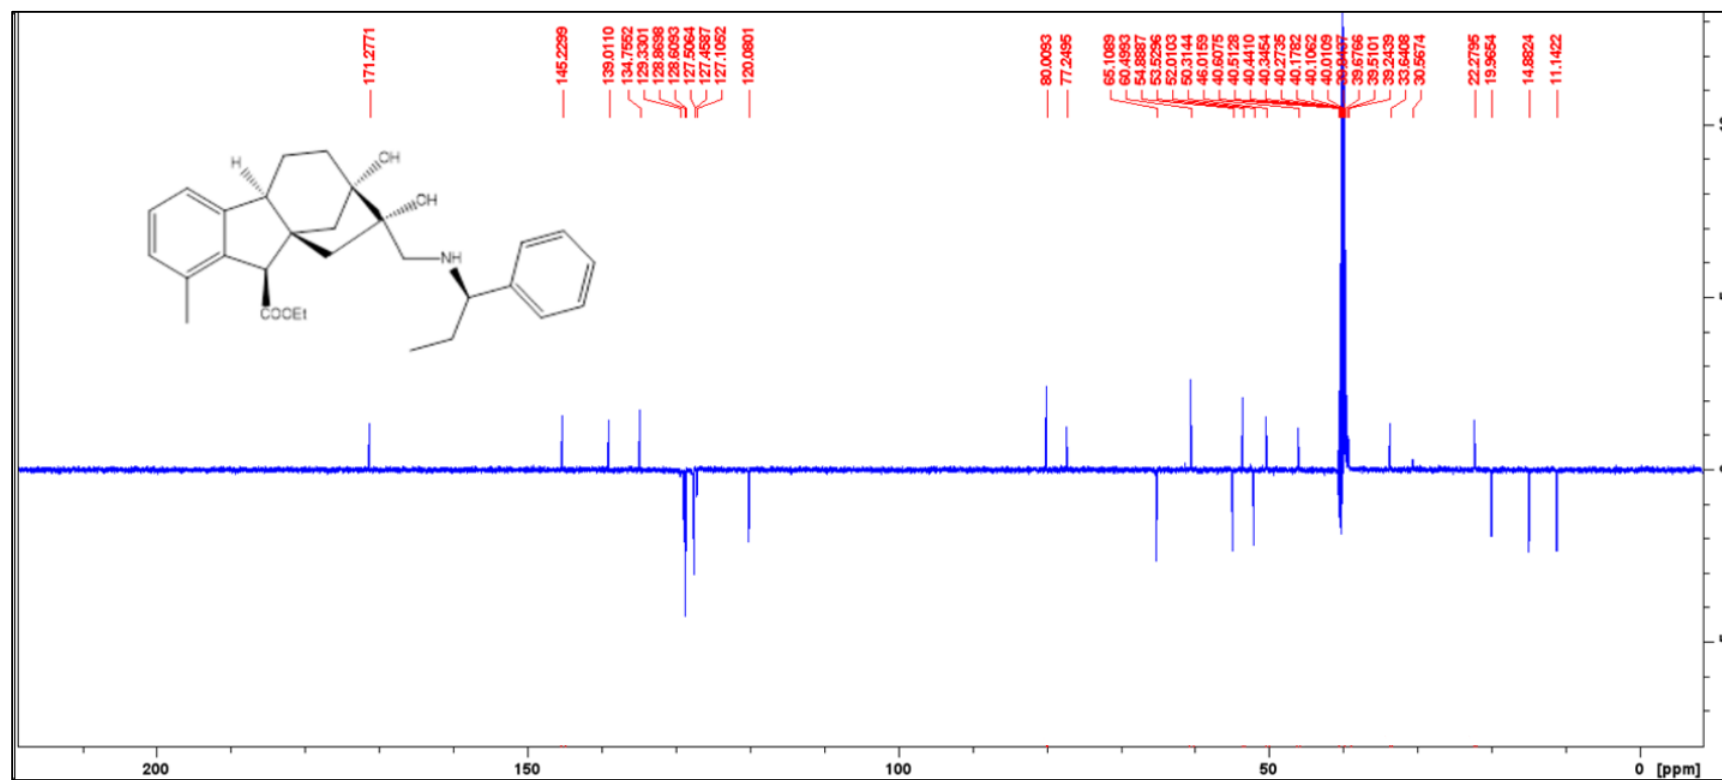

Figure S 18:  $^1\text{H}$ -NMR of compound 8

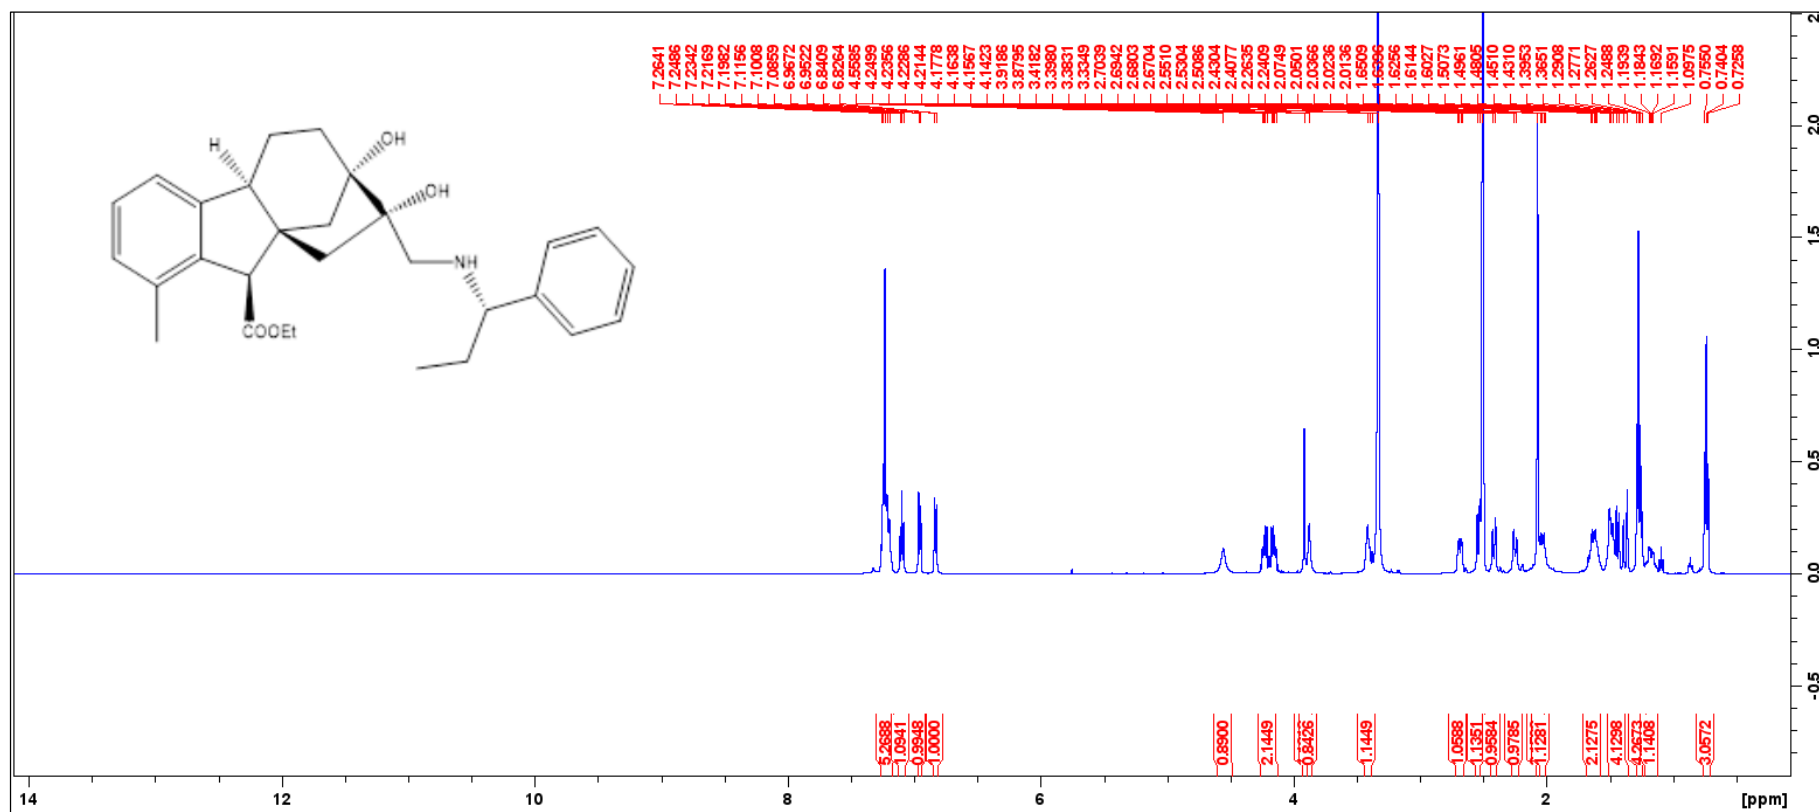

Figure S 19:  $^{13}\text{C}$ -NMR (JMOD) of compound 8

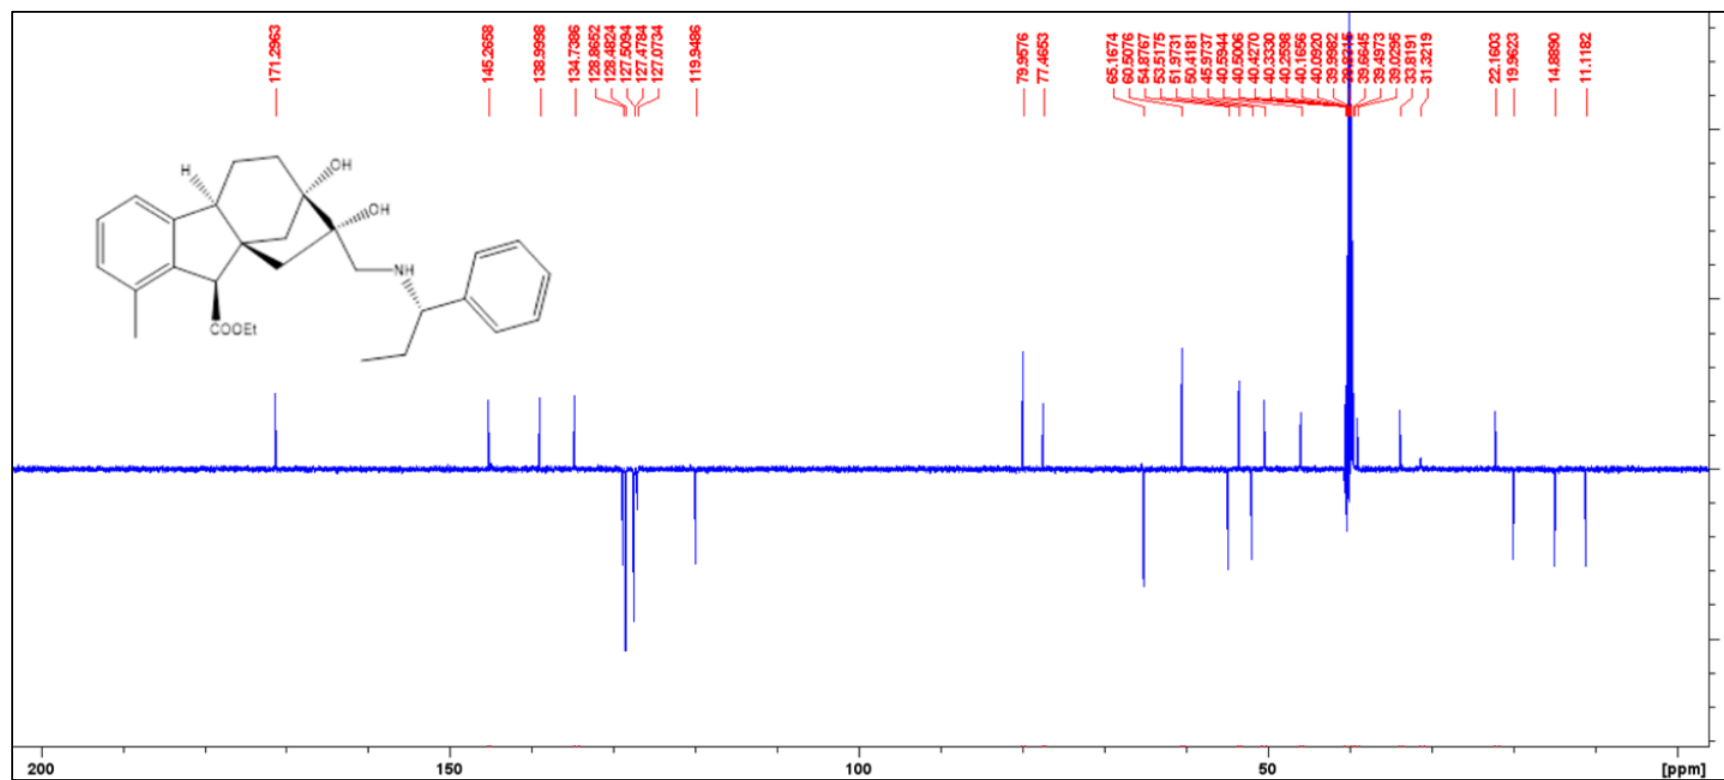



Figure S 20: <sup>1</sup>H-NMR of compound 9

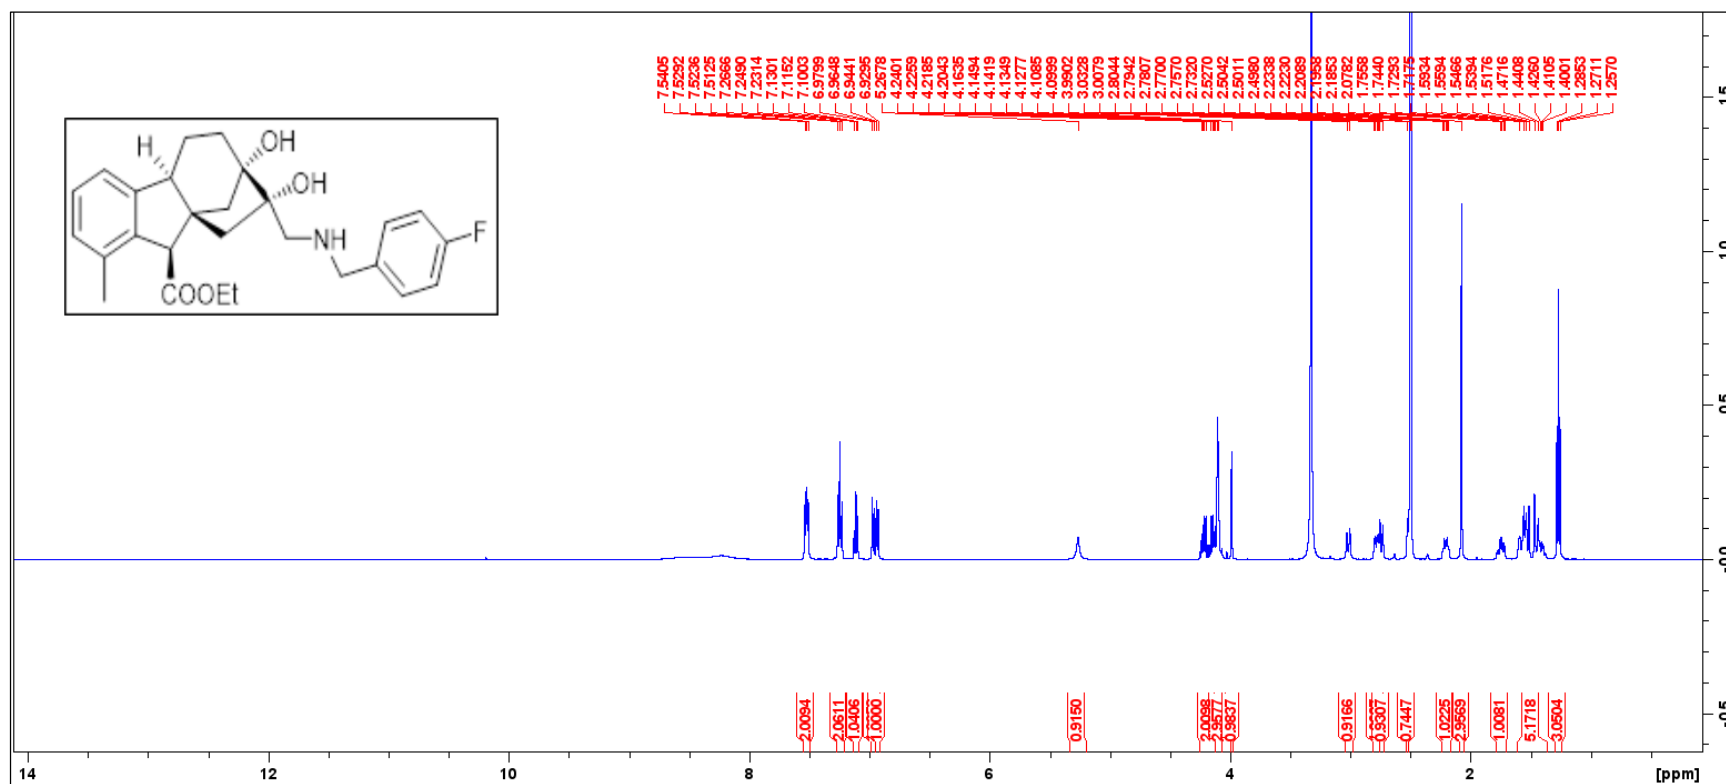

Figure S 21:  $^{13}\text{C}$ -NMR (JMOD) of compound 9

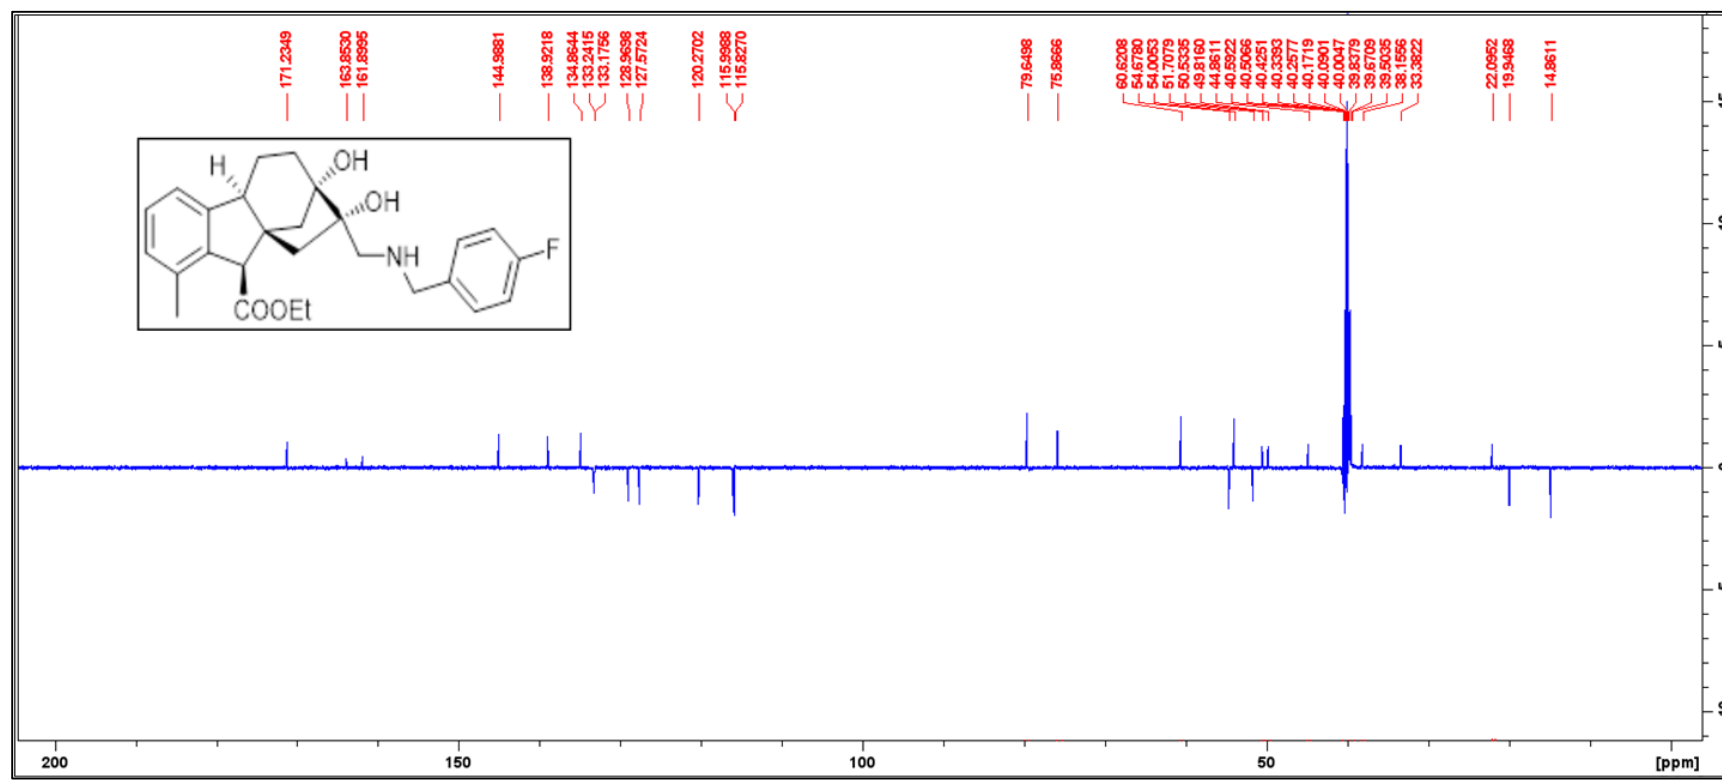

Figure S 22:  $^1\text{H}$ -NMR of compound 10

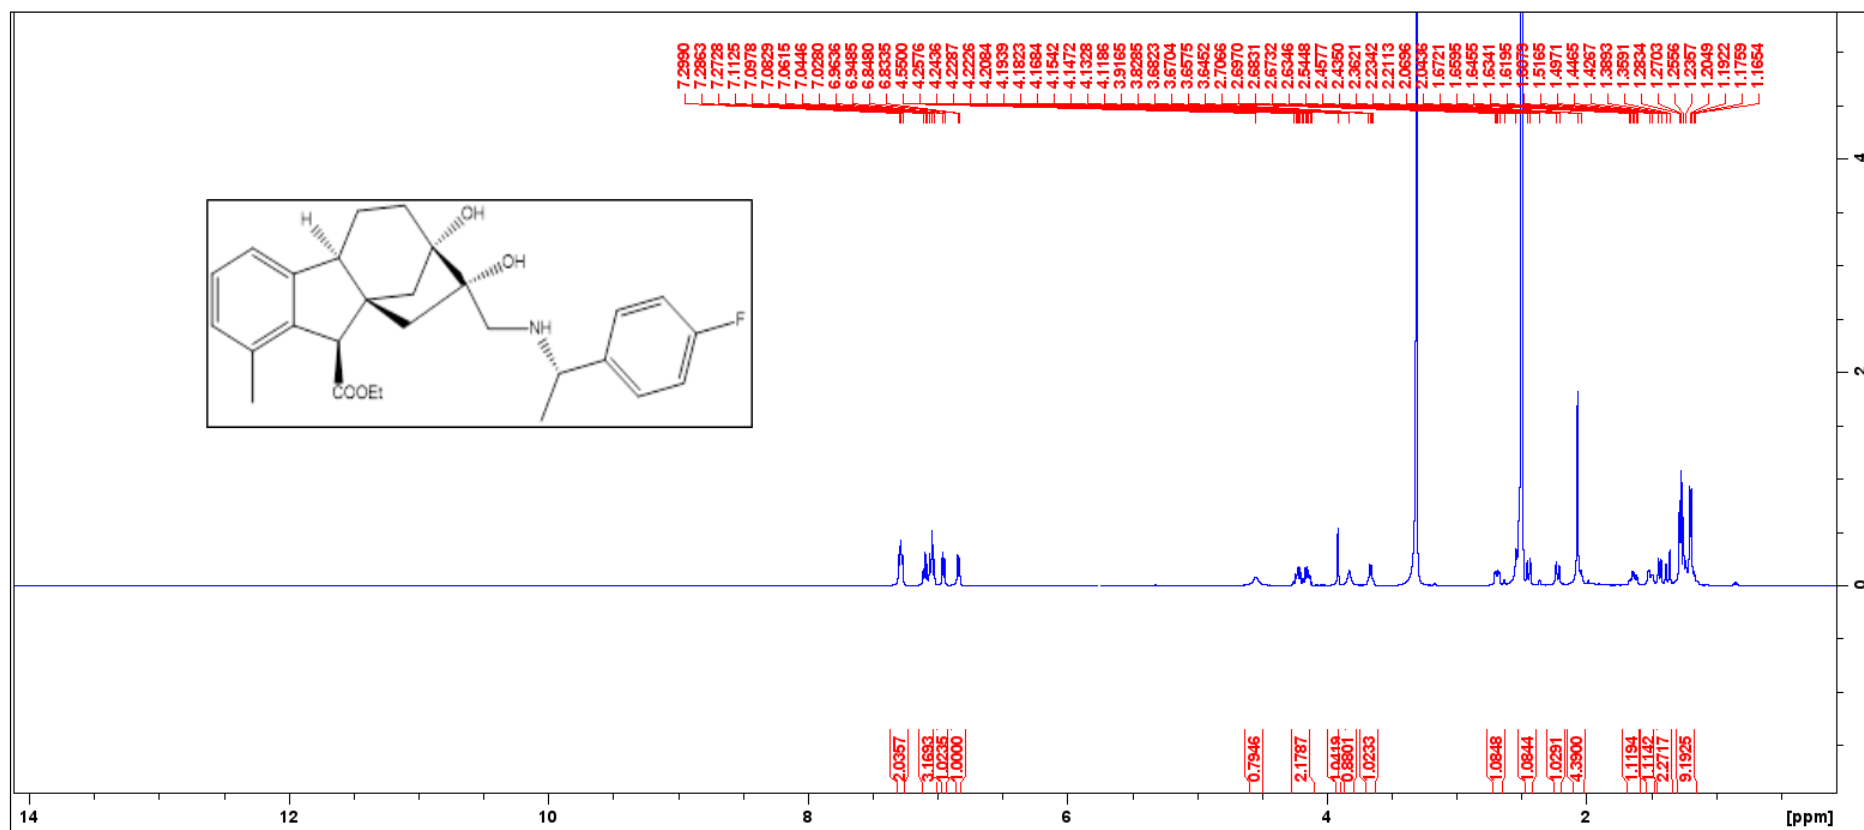

Figure S 23:  $^{13}\text{C}$ -NMR (JMOD) of compound 10

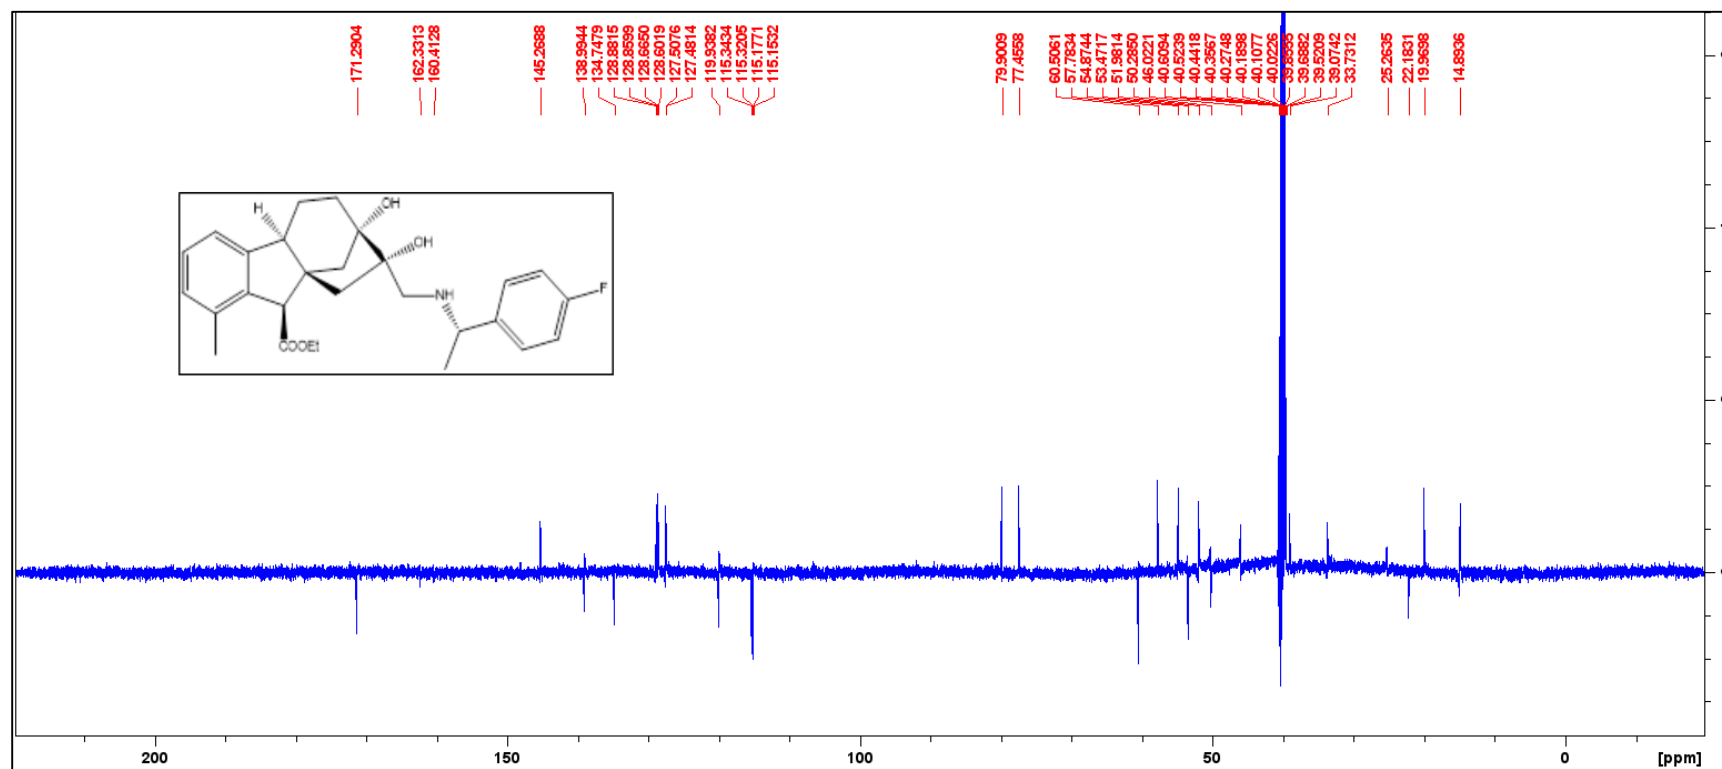

Figure S 24: HSQC of compound 10

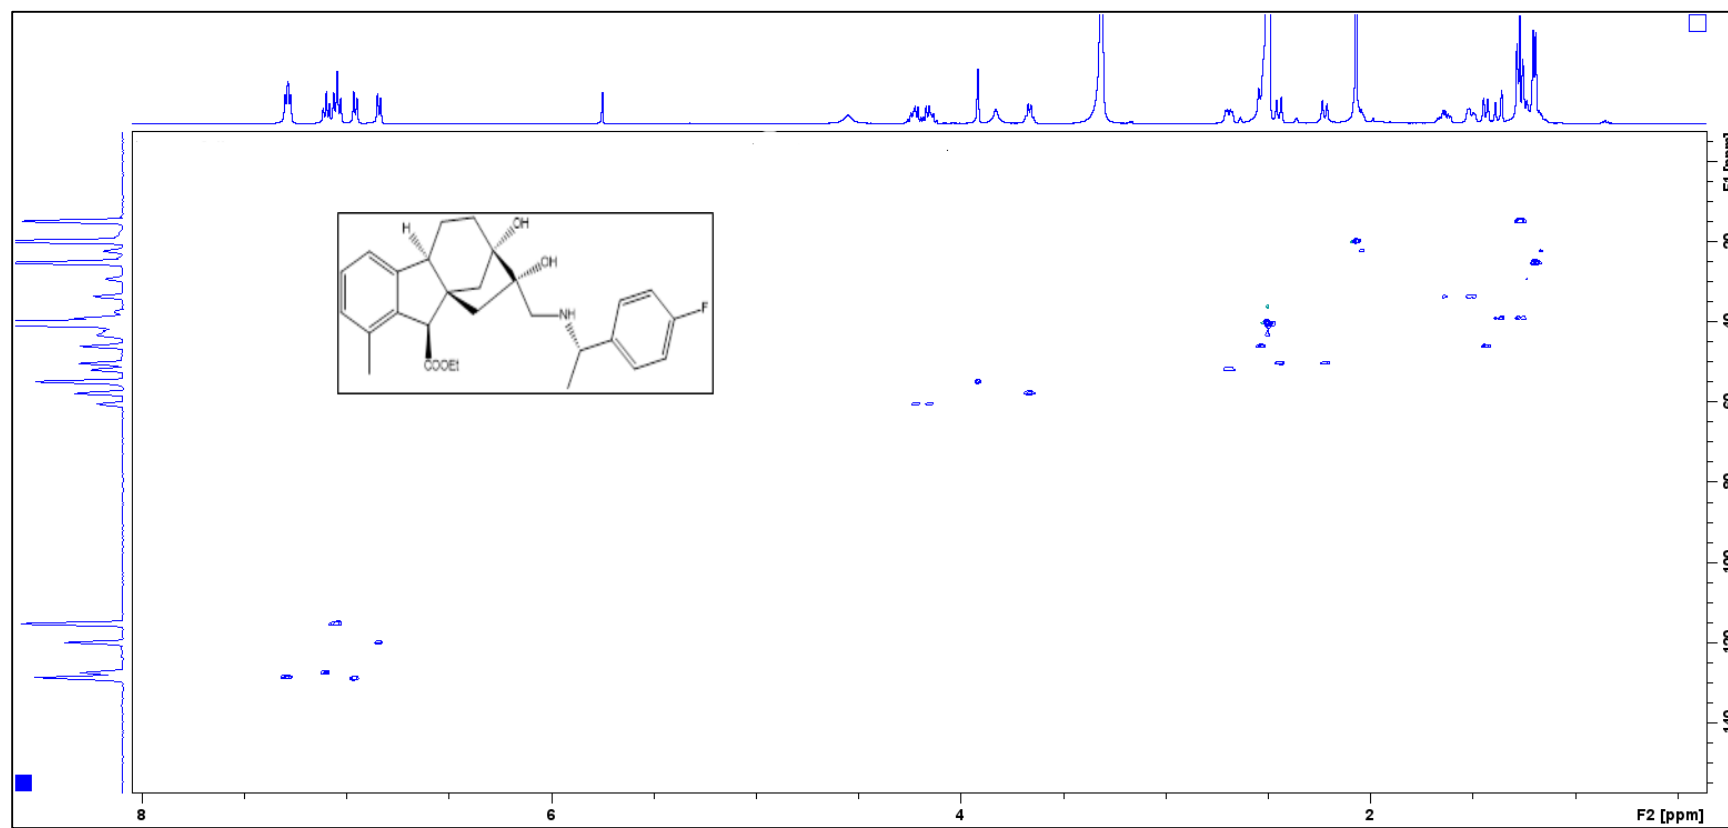

Figure S 25: HMBC of compound 10

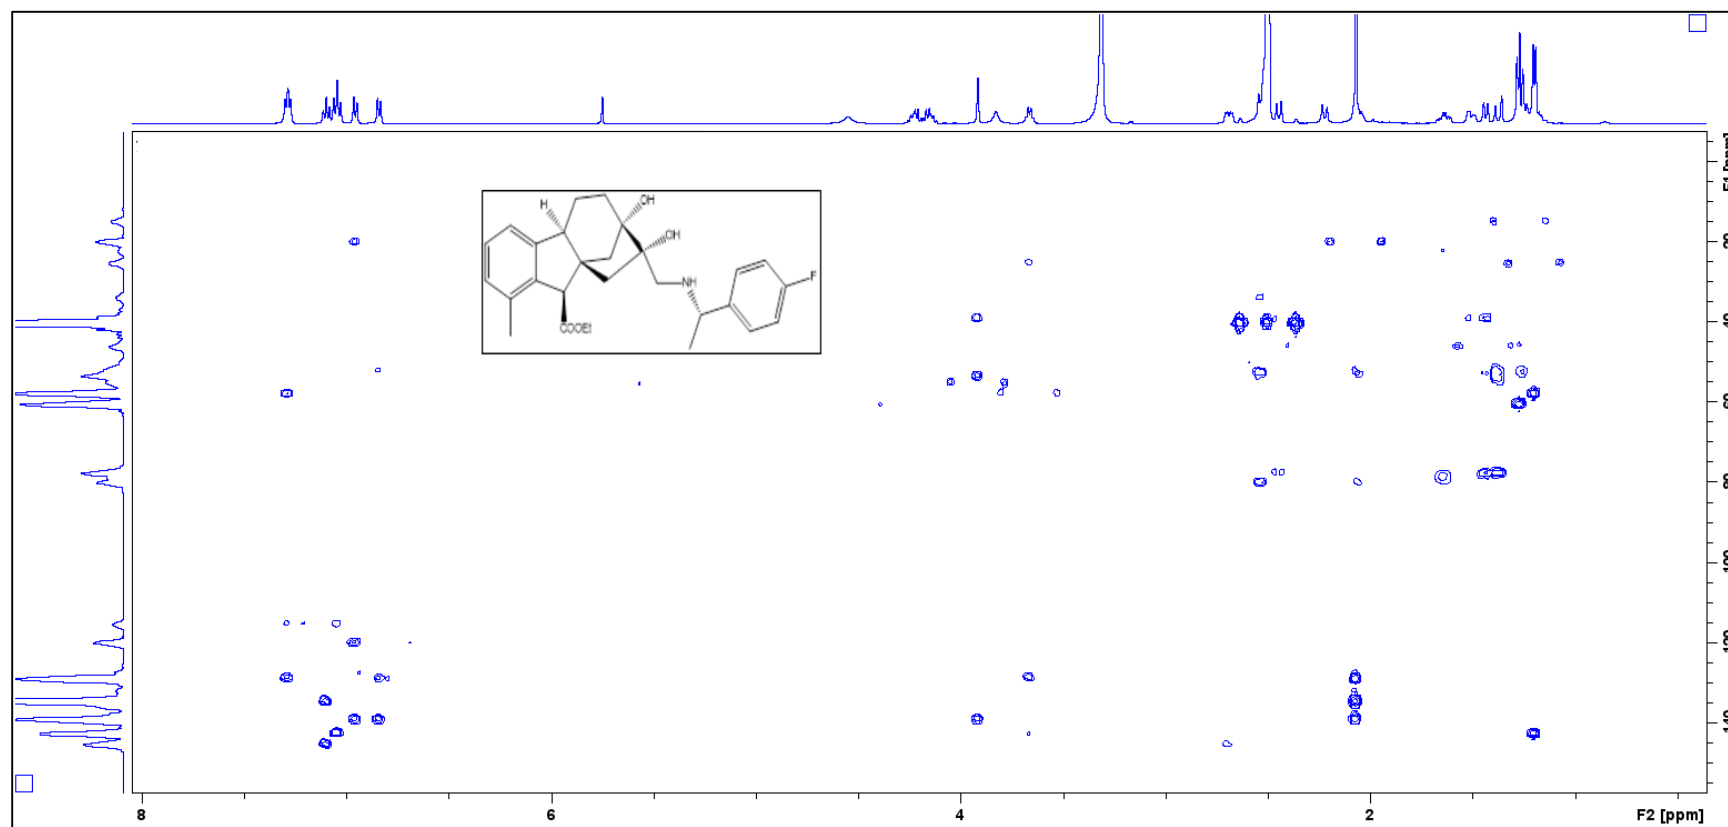

Figure S 26: <sup>1</sup>H-NMR of compound 11

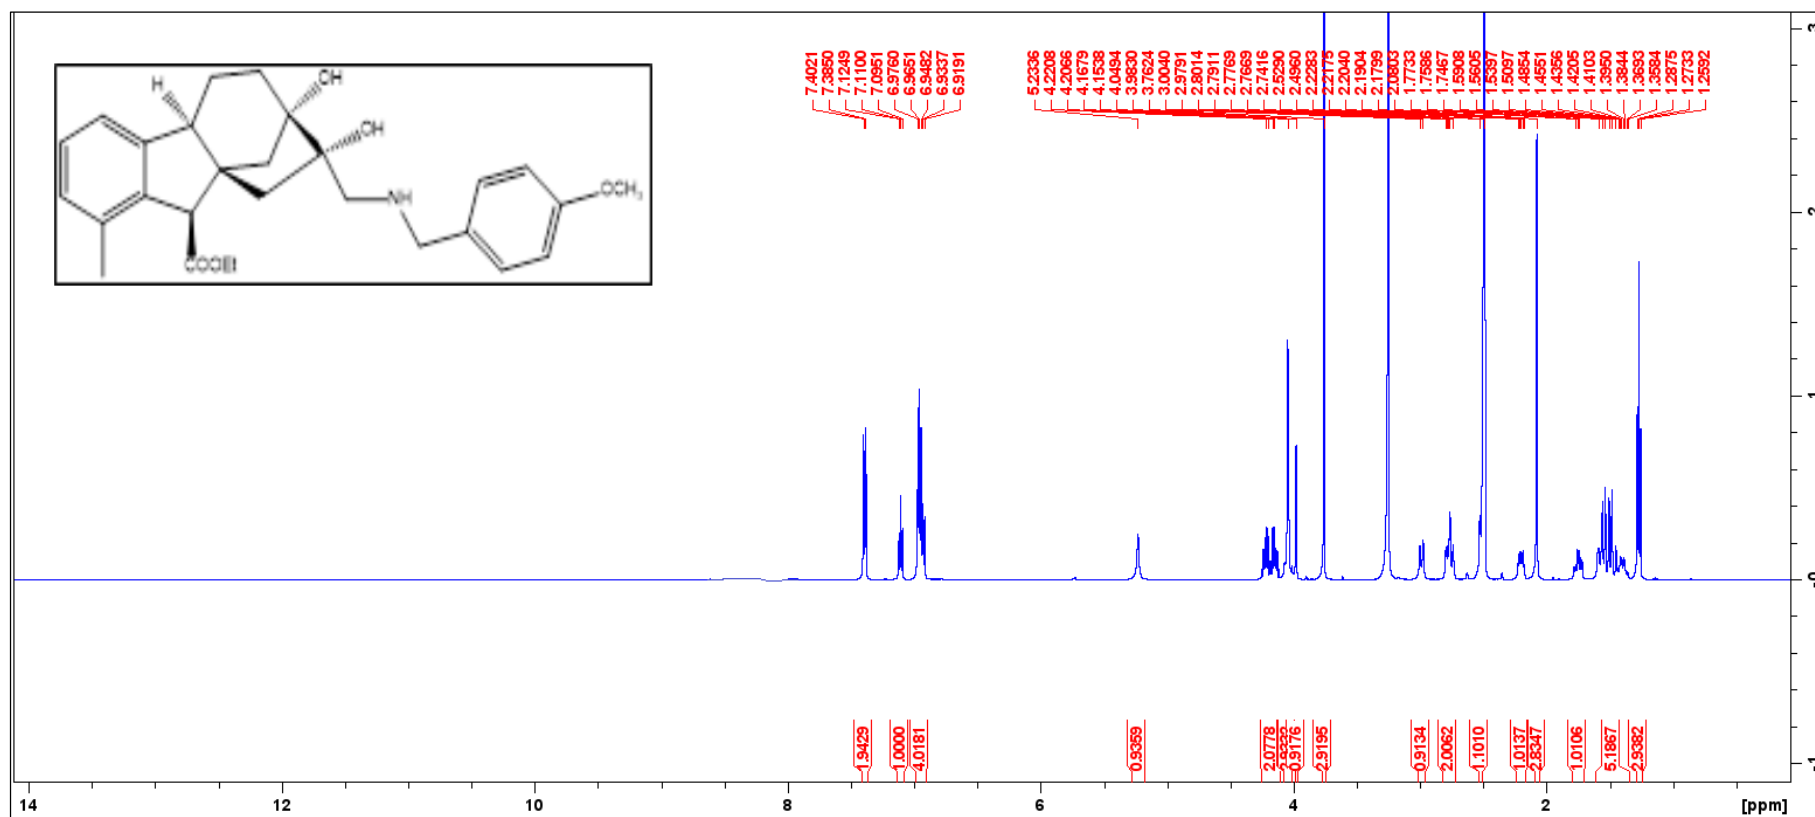

Figure S 27:  $^{13}\text{C}$ -NMR (JMOD) of compound 11

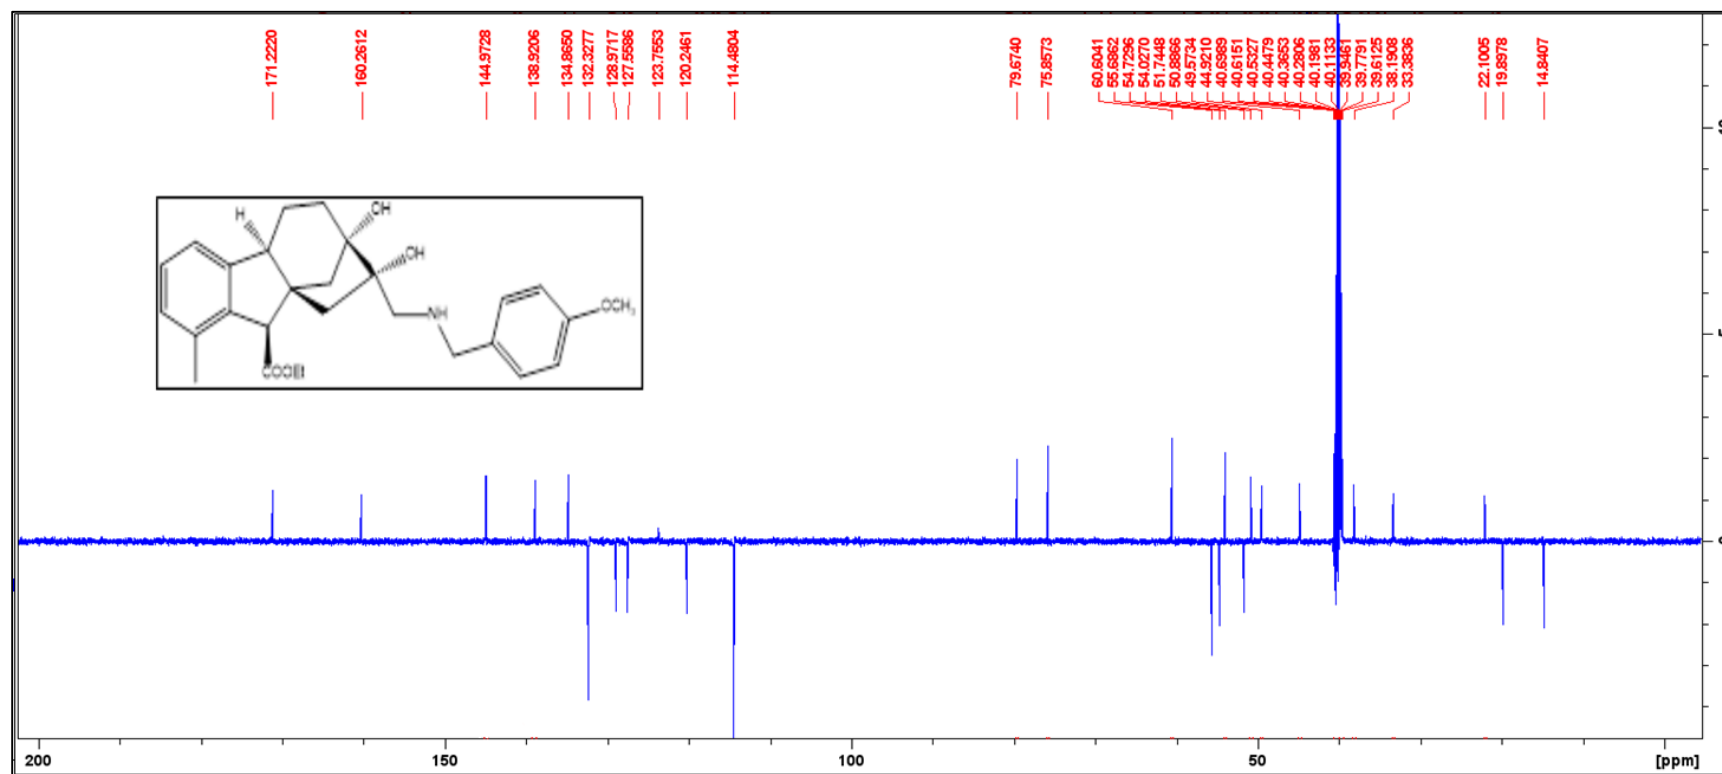



Figure S 28: <sup>1</sup>H-NMR of compound 12

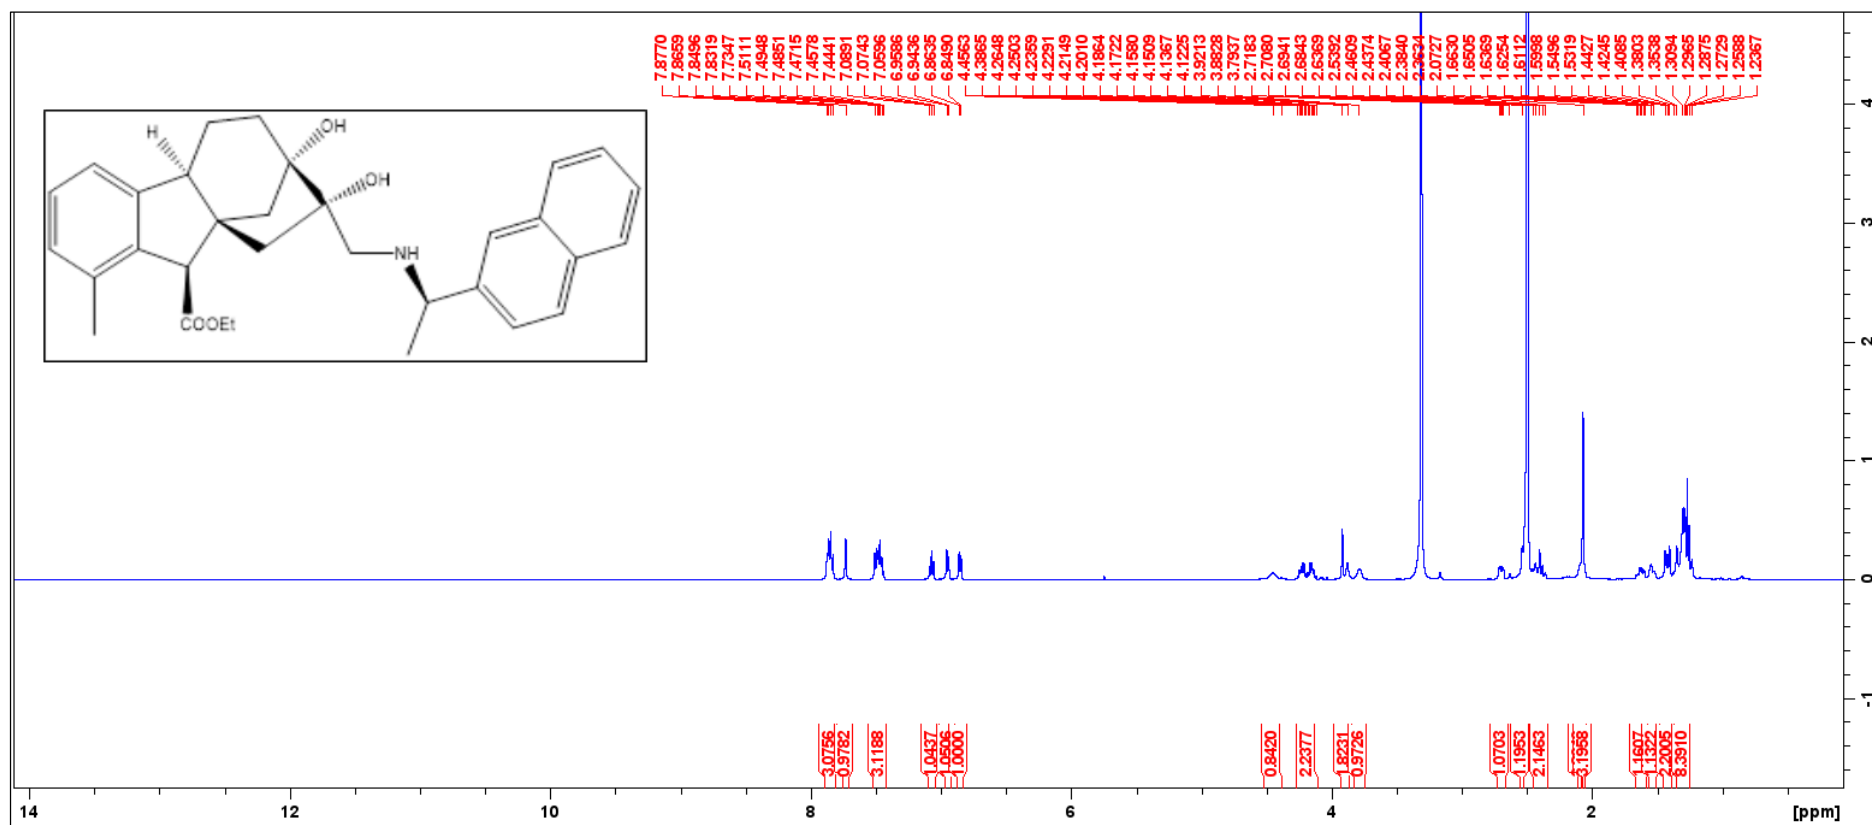

Figure S 29:  $^{13}\text{C}$ -NMR (JMOD) of compound 12

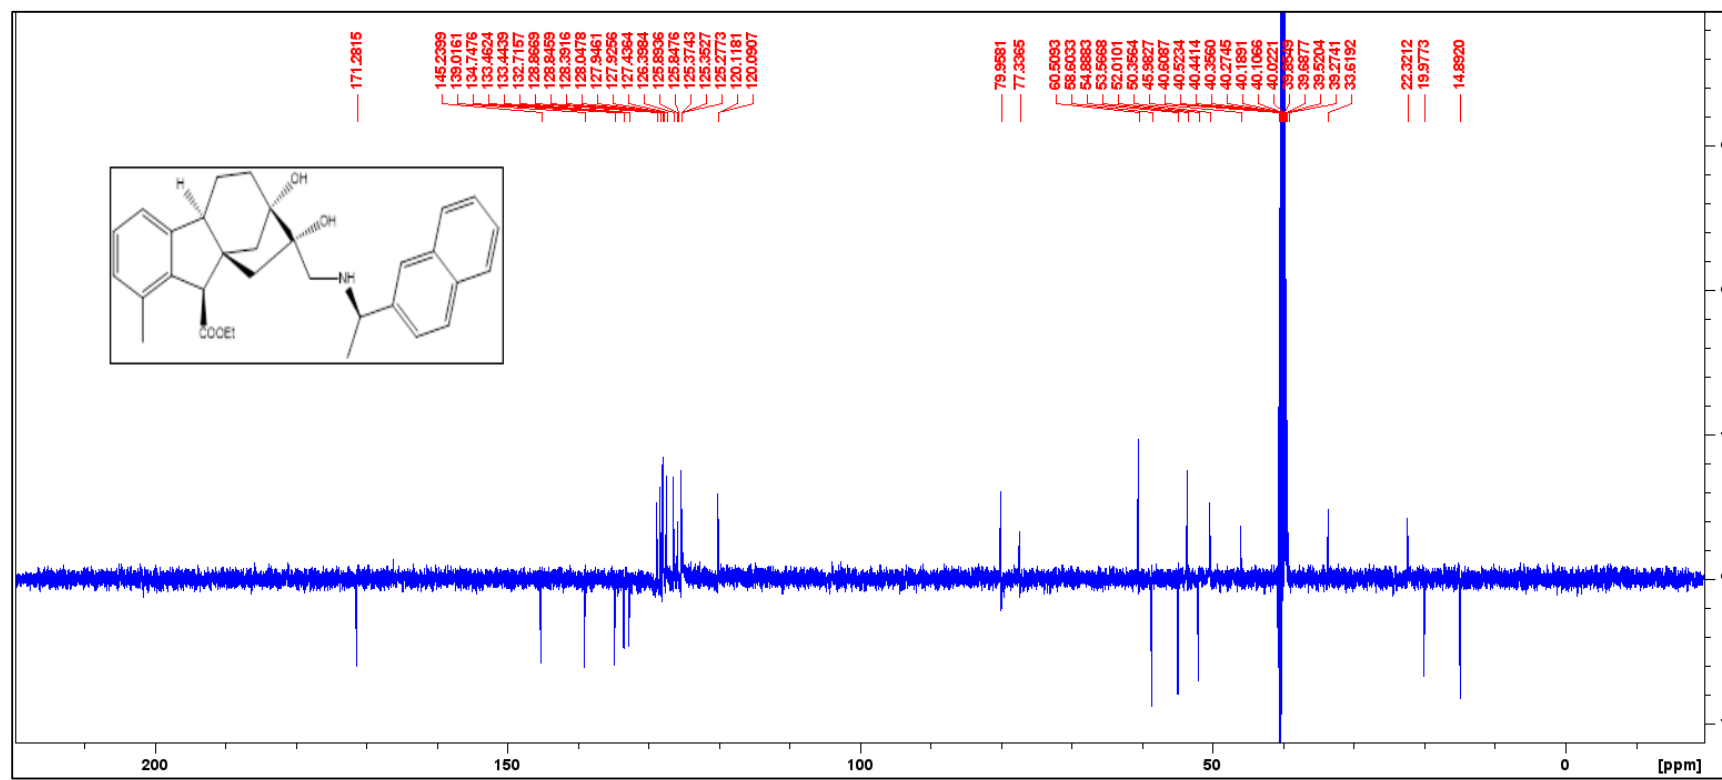

Figure S 30: HSQC of compound 12

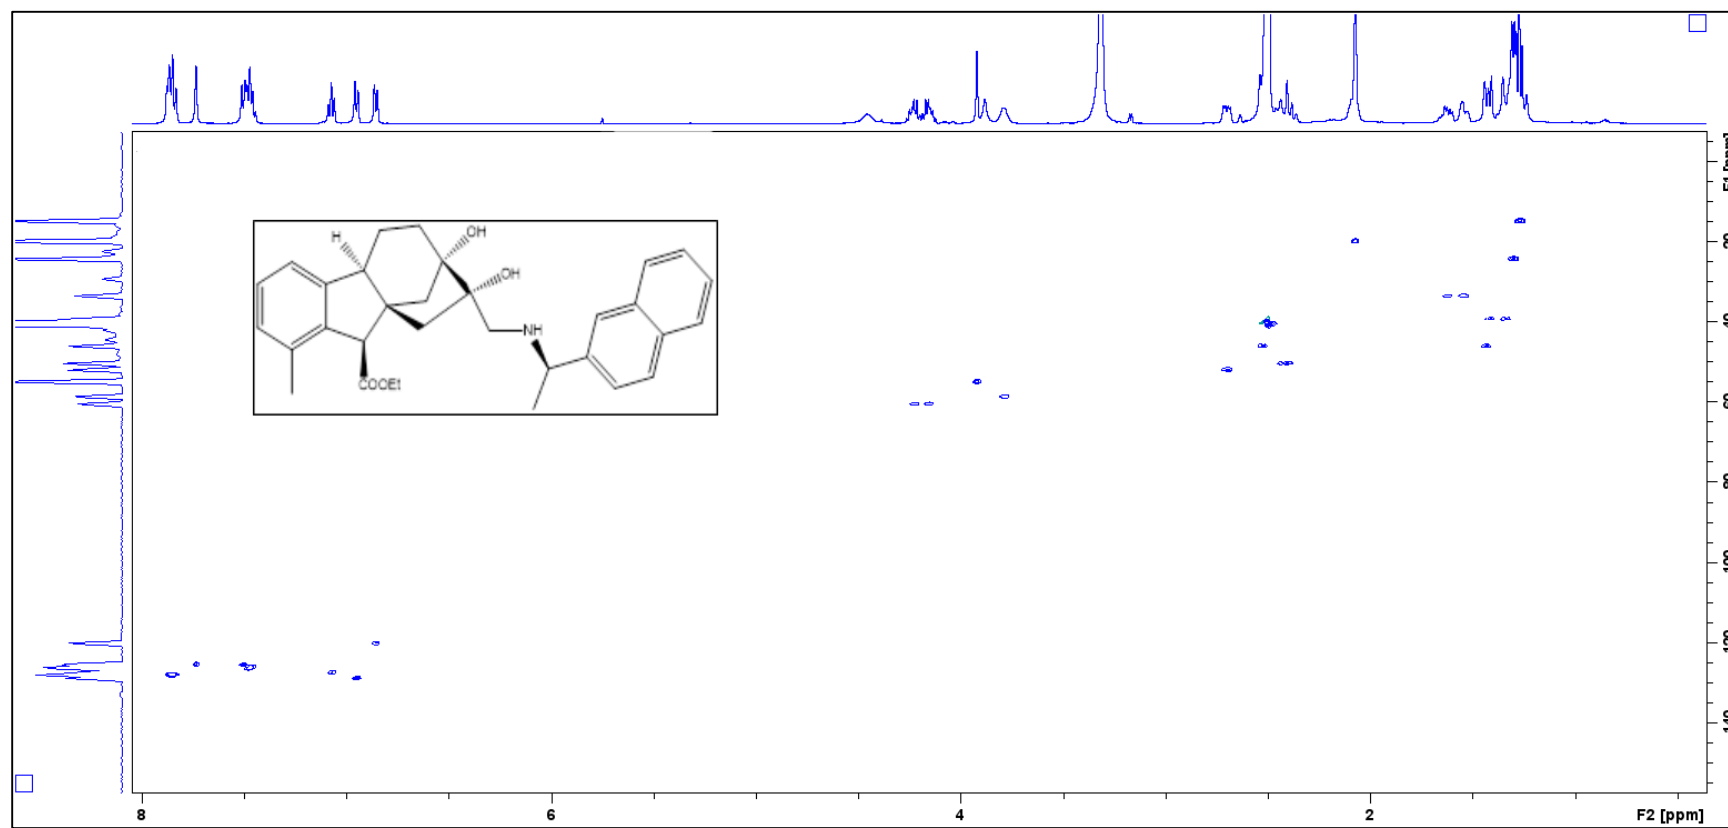

Figure S 31: HMBC of compound 12

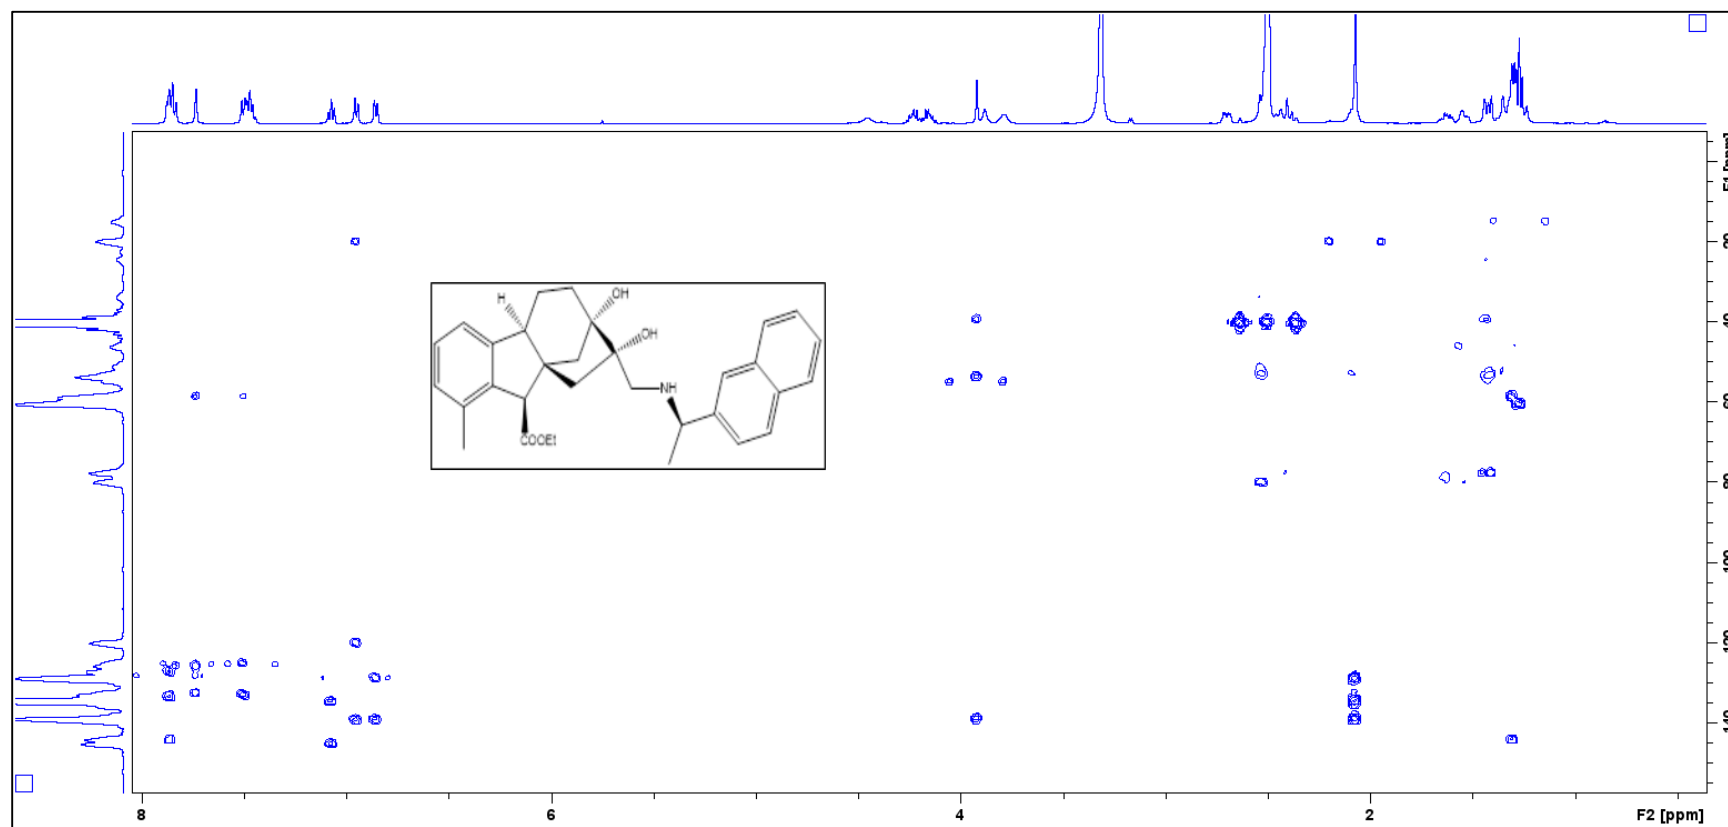

Figure S 32: <sup>1</sup>H-NMR of compound 13

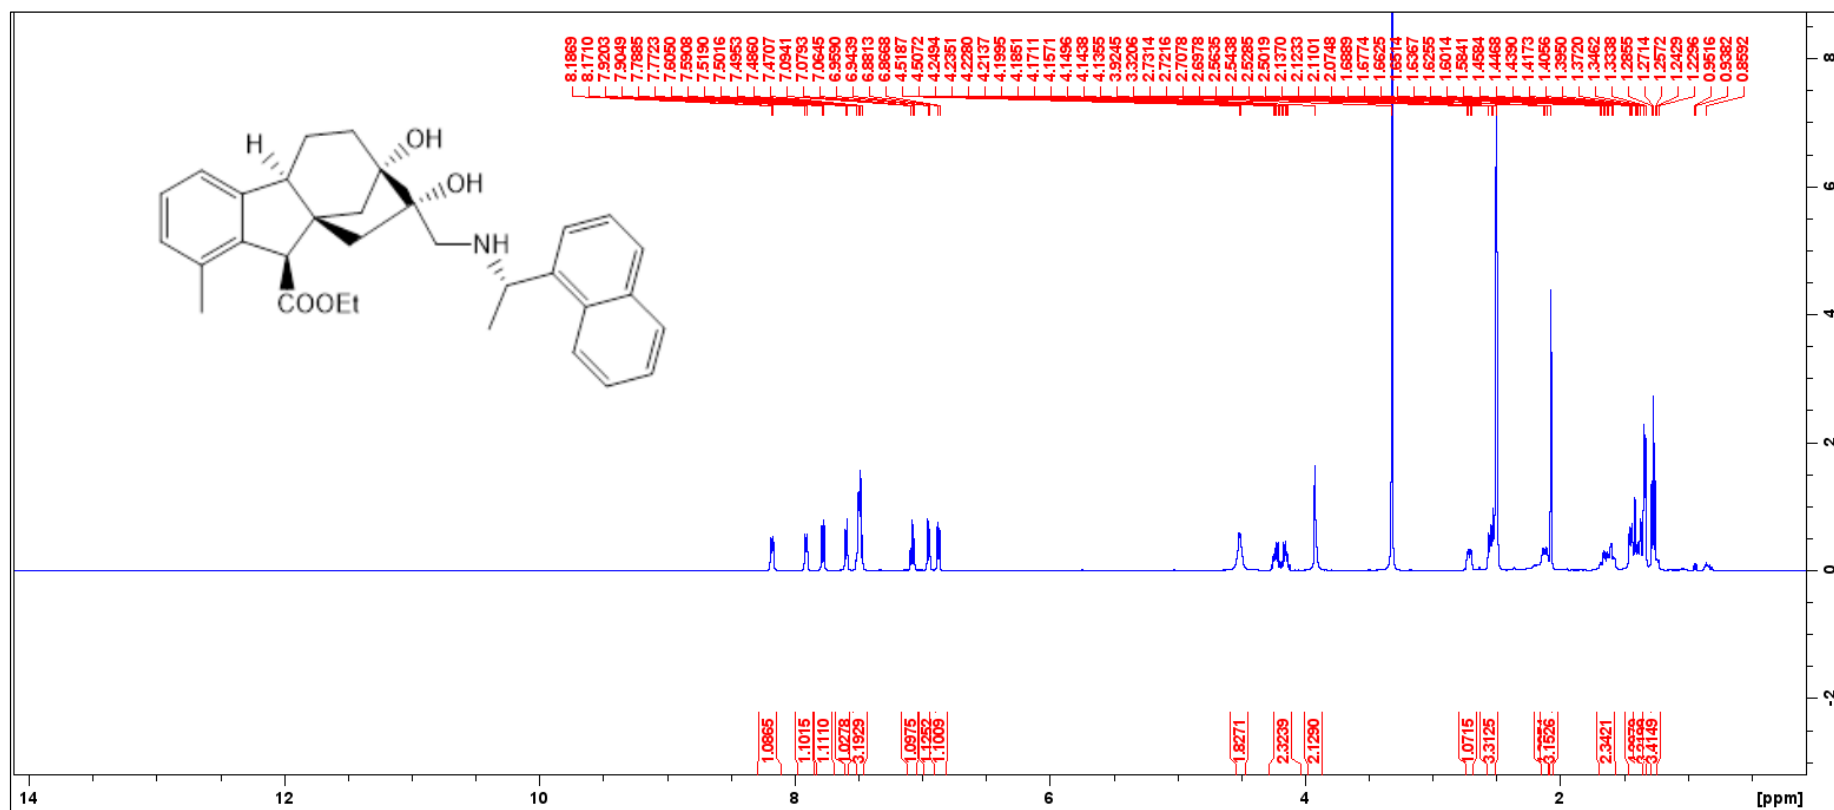

Figure S 33:  $^{13}\text{C}$ -NMR (JMOD) of compound 13

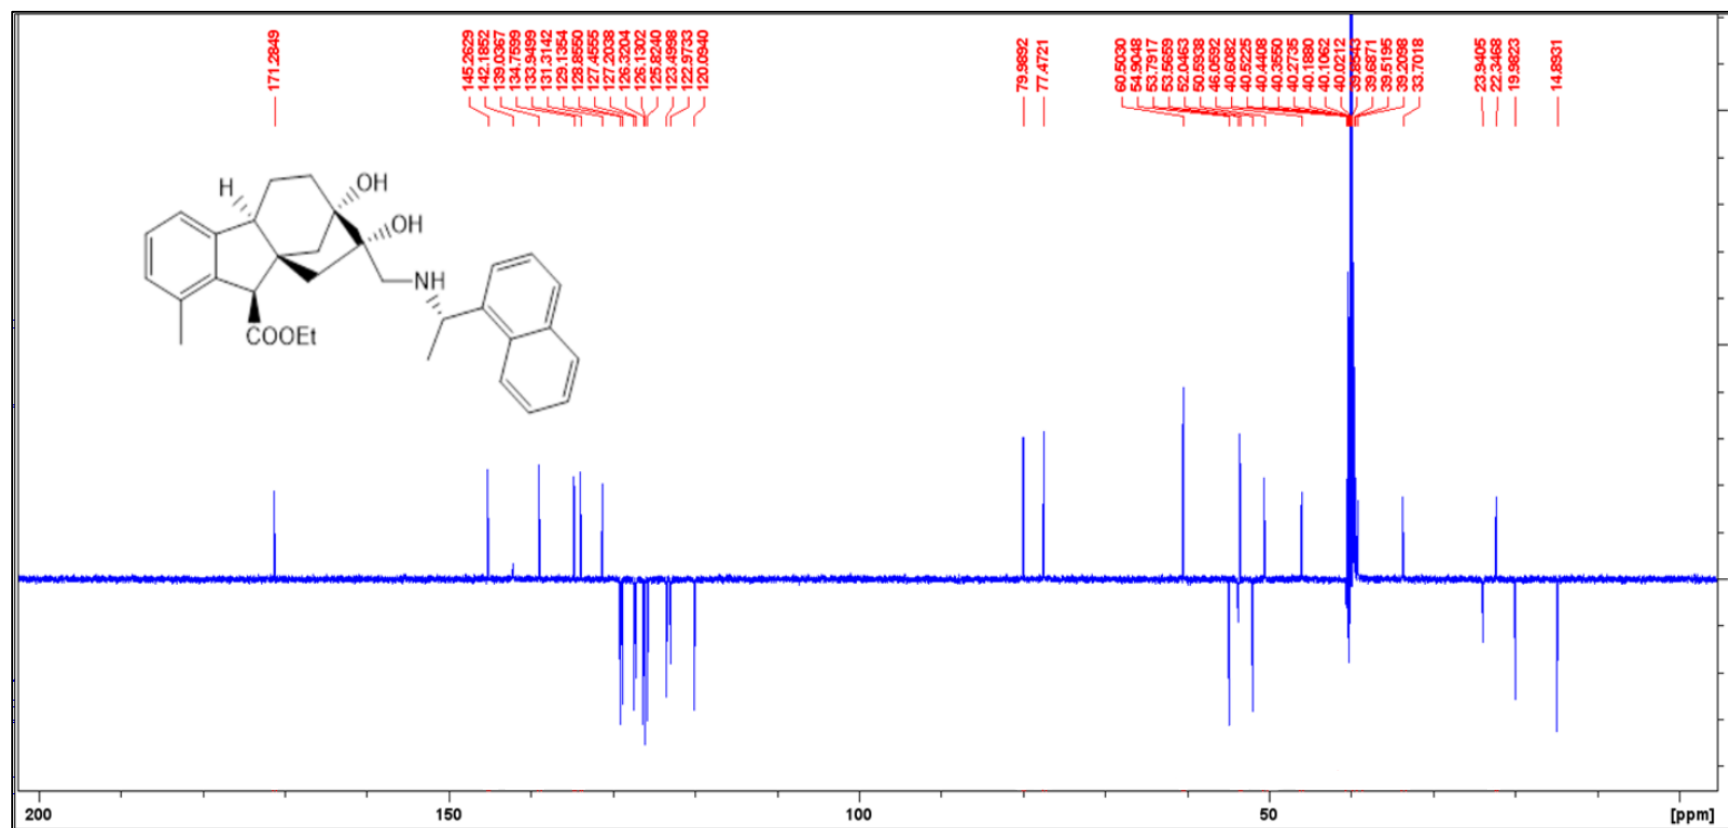

Figure S 34:  $^1\text{H}$ -NMR of compound 14

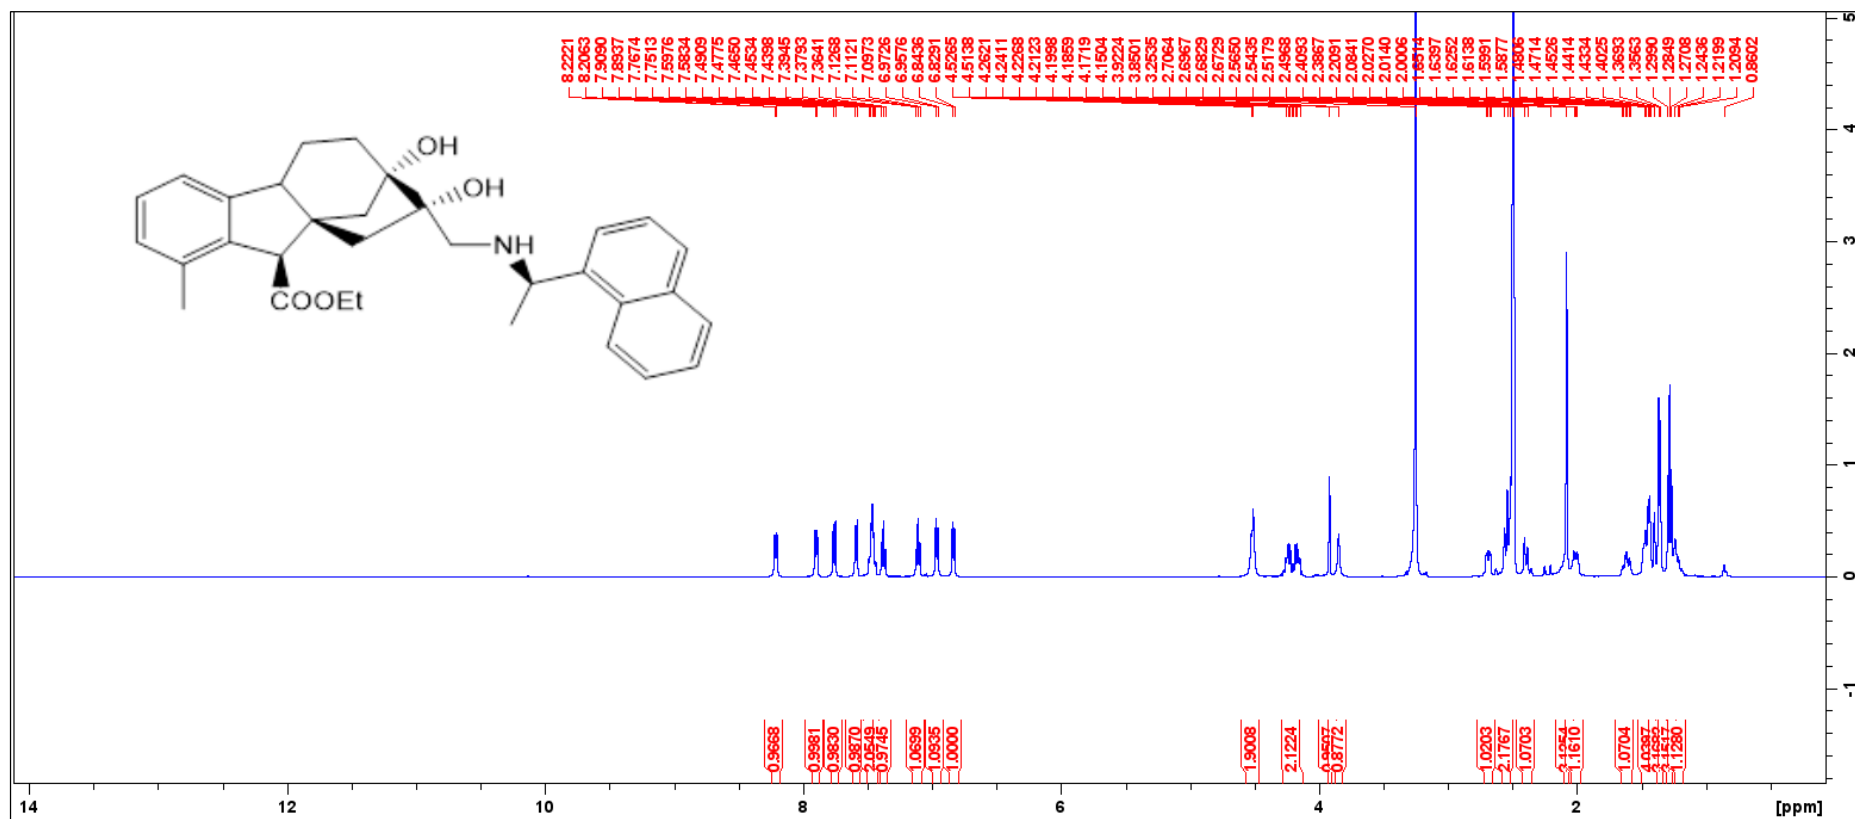

Figure S 35:  $^{13}\text{C}$ -NMR (JMOD) of compound 14

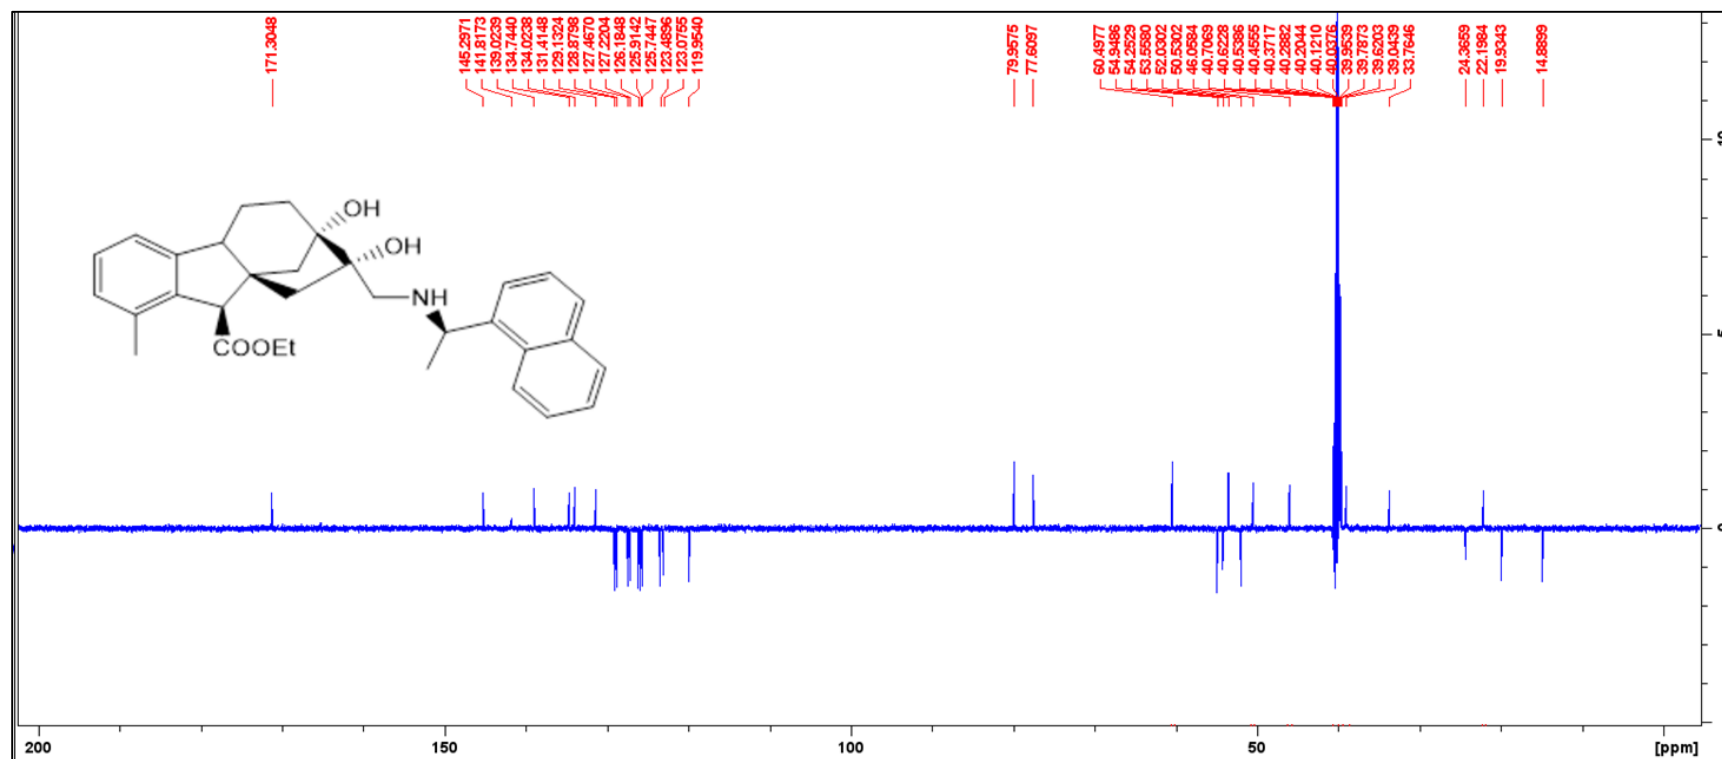



Figure S 36: <sup>1</sup>H-NMR of compound 15

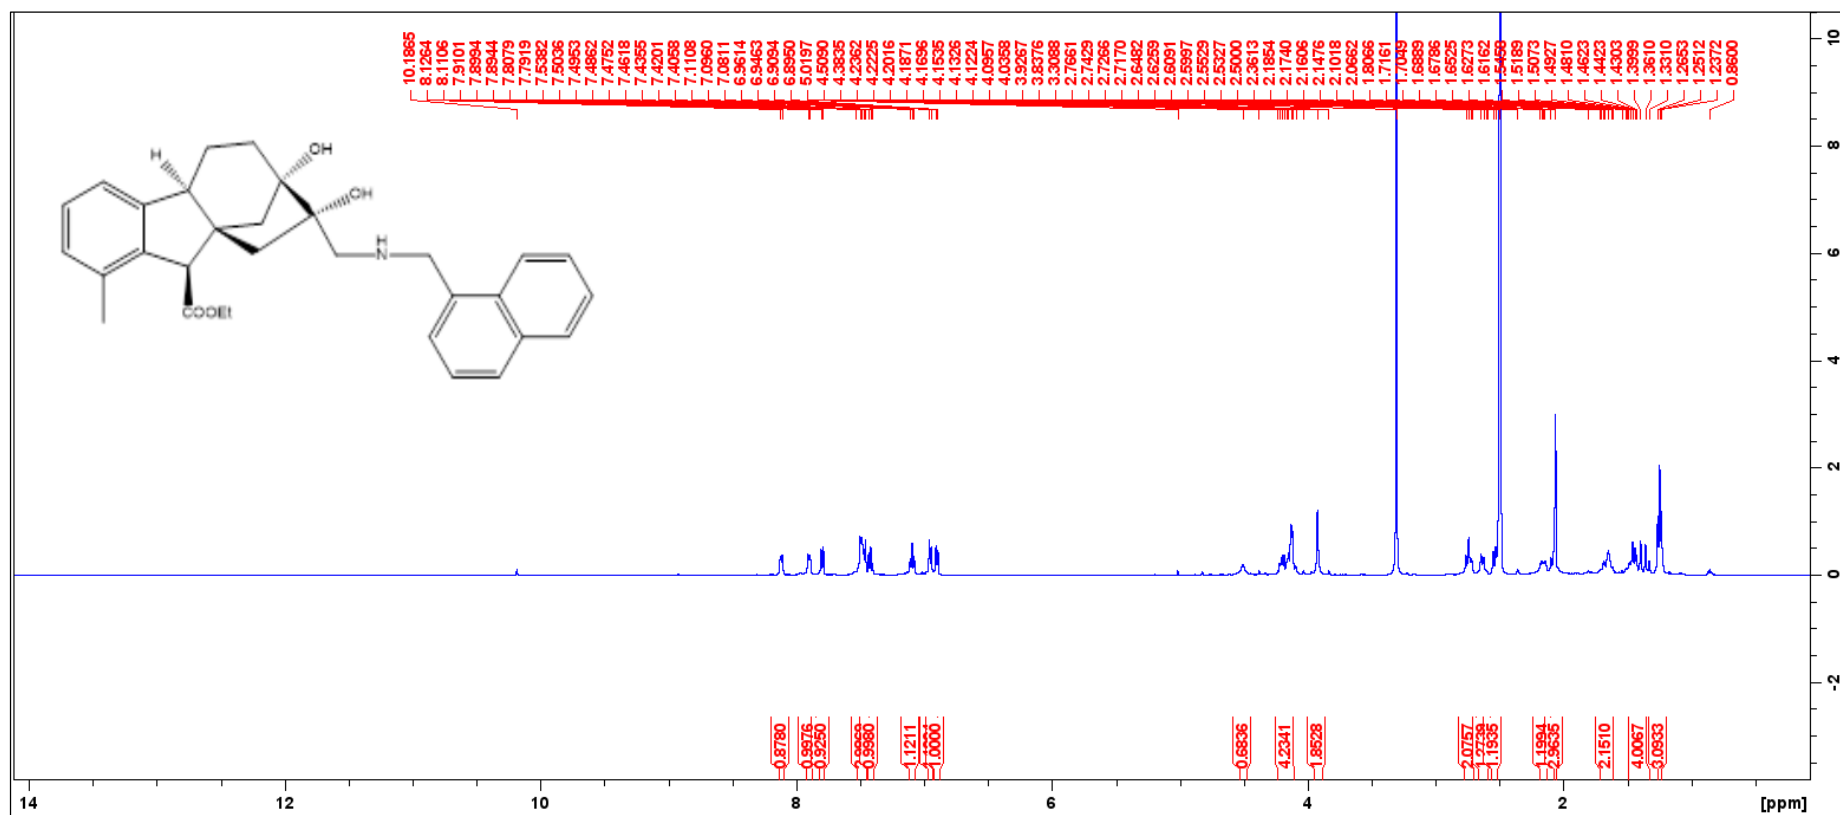

Figure S 37:  $^{13}\text{C}$ -NMR (JMOD) of compound 15

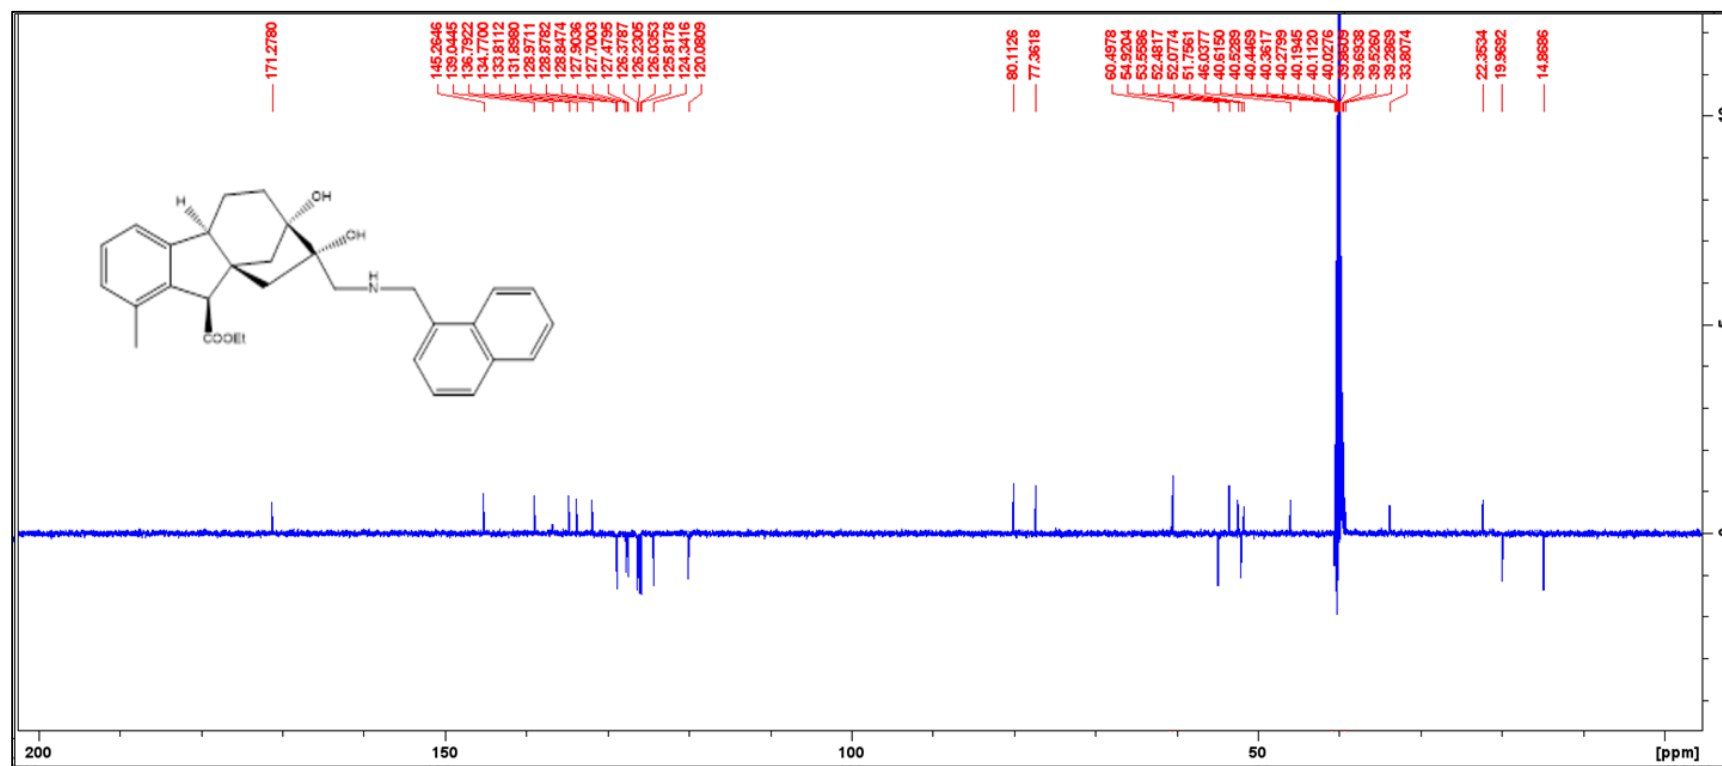

Figure S 38: <sup>1</sup>H-NMR of compound 16

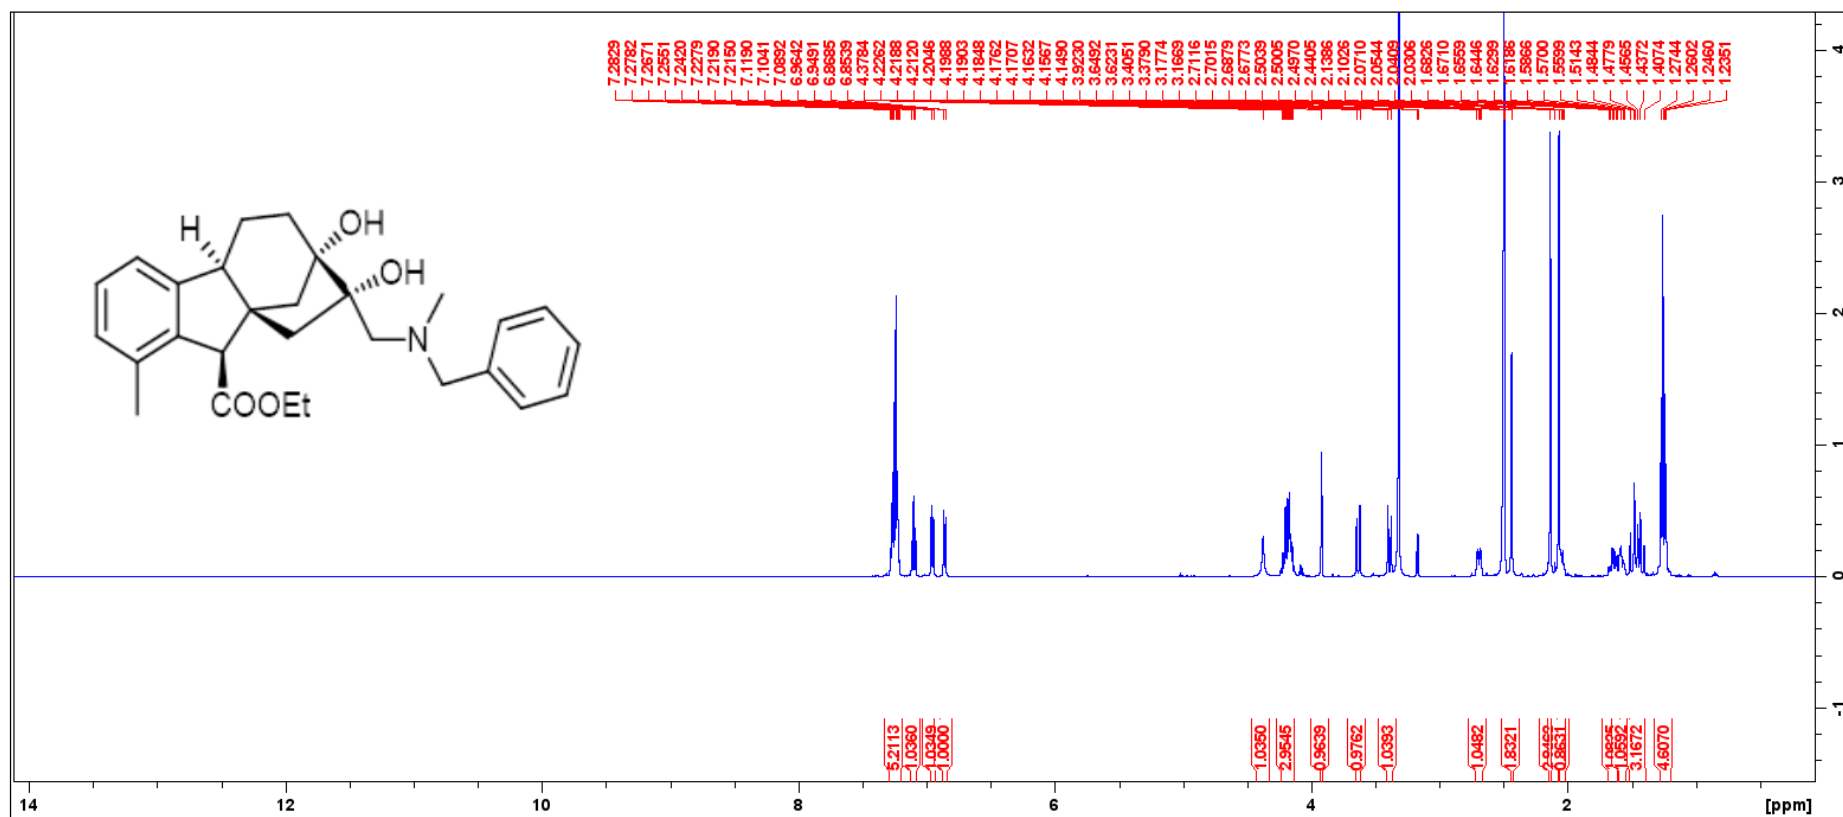

Figure S 39:  $^{13}\text{C}$ -NMR (JMOD) of compound 16

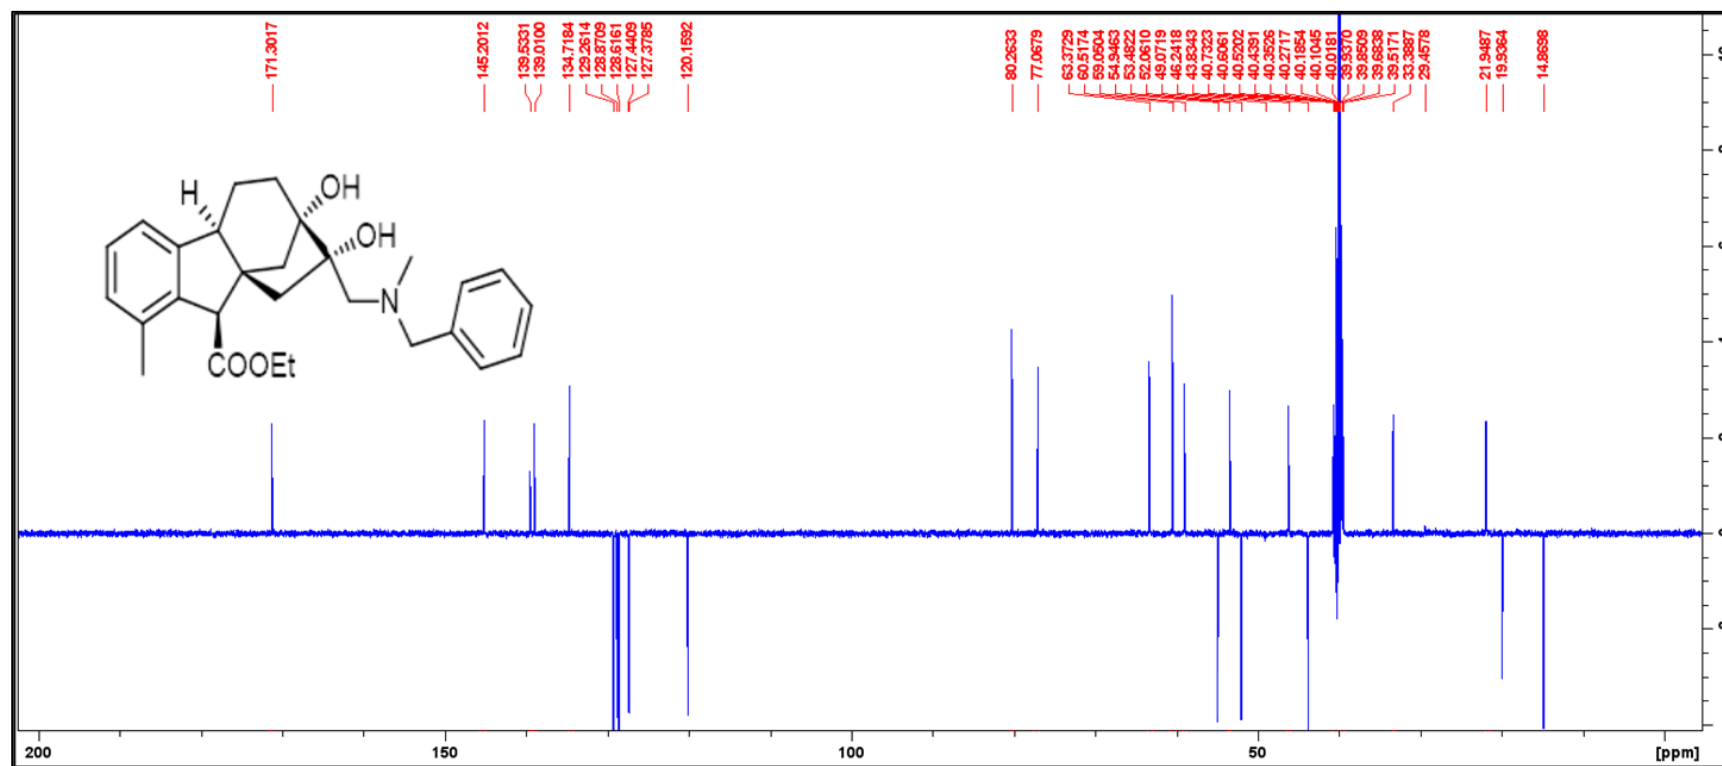

Figure S 40:  $^1\text{H}$ -NMR of compound 17

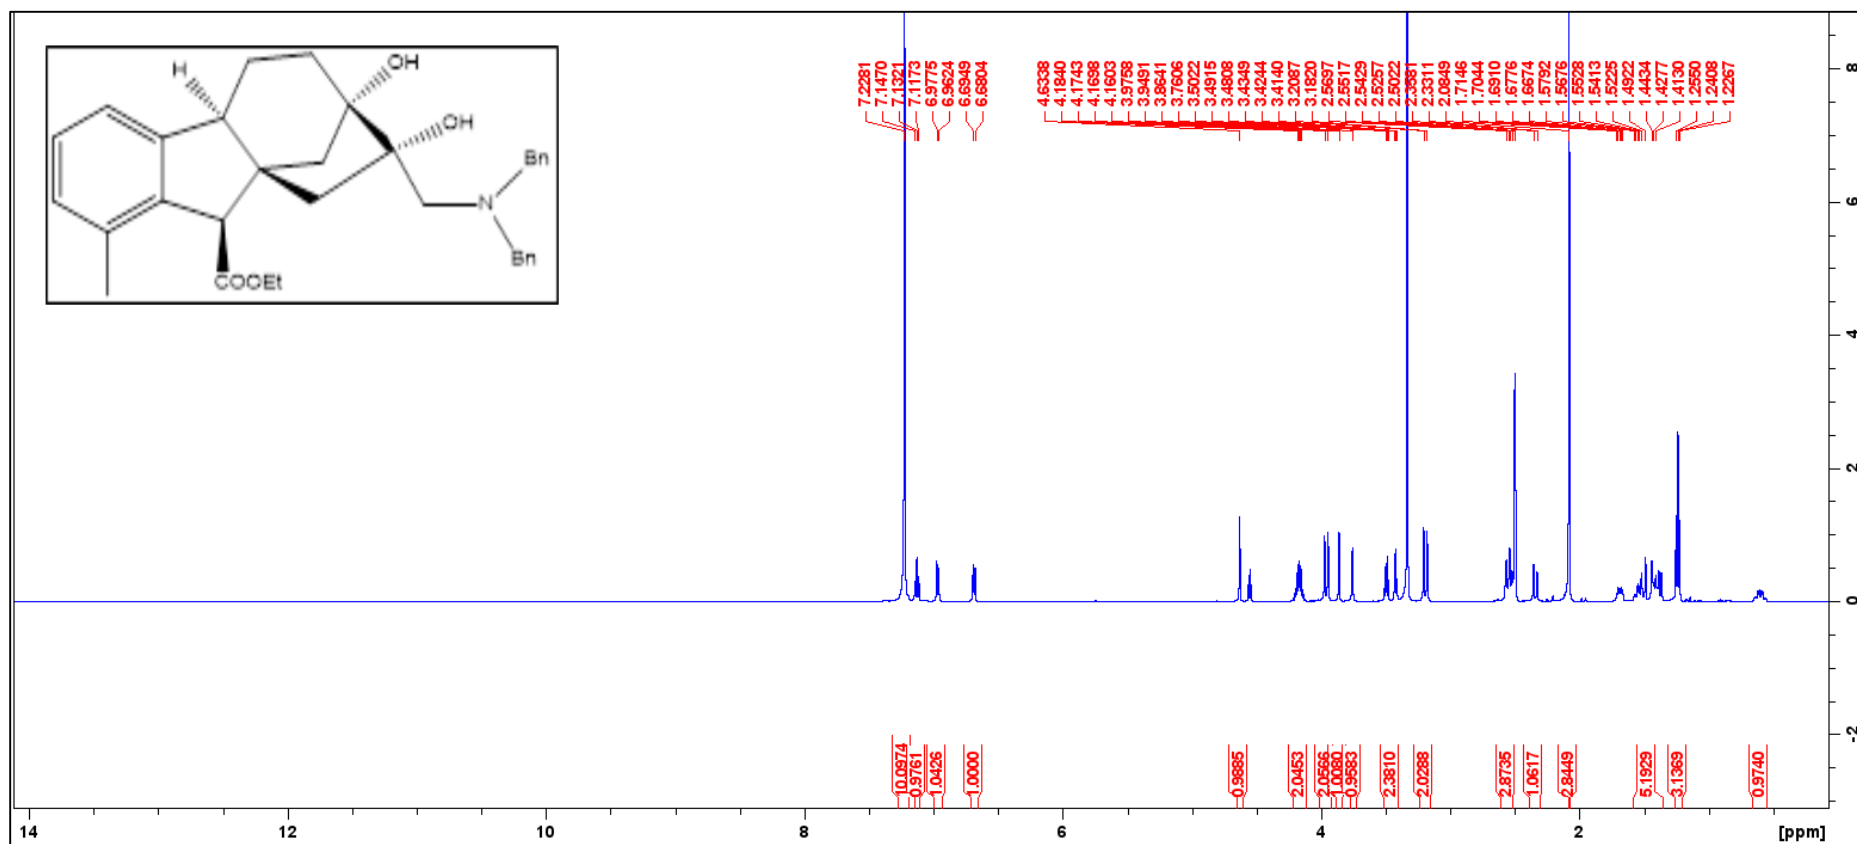

Figure S 41:  $^{13}\text{C}$ -NMR (JMOD) of compound 17

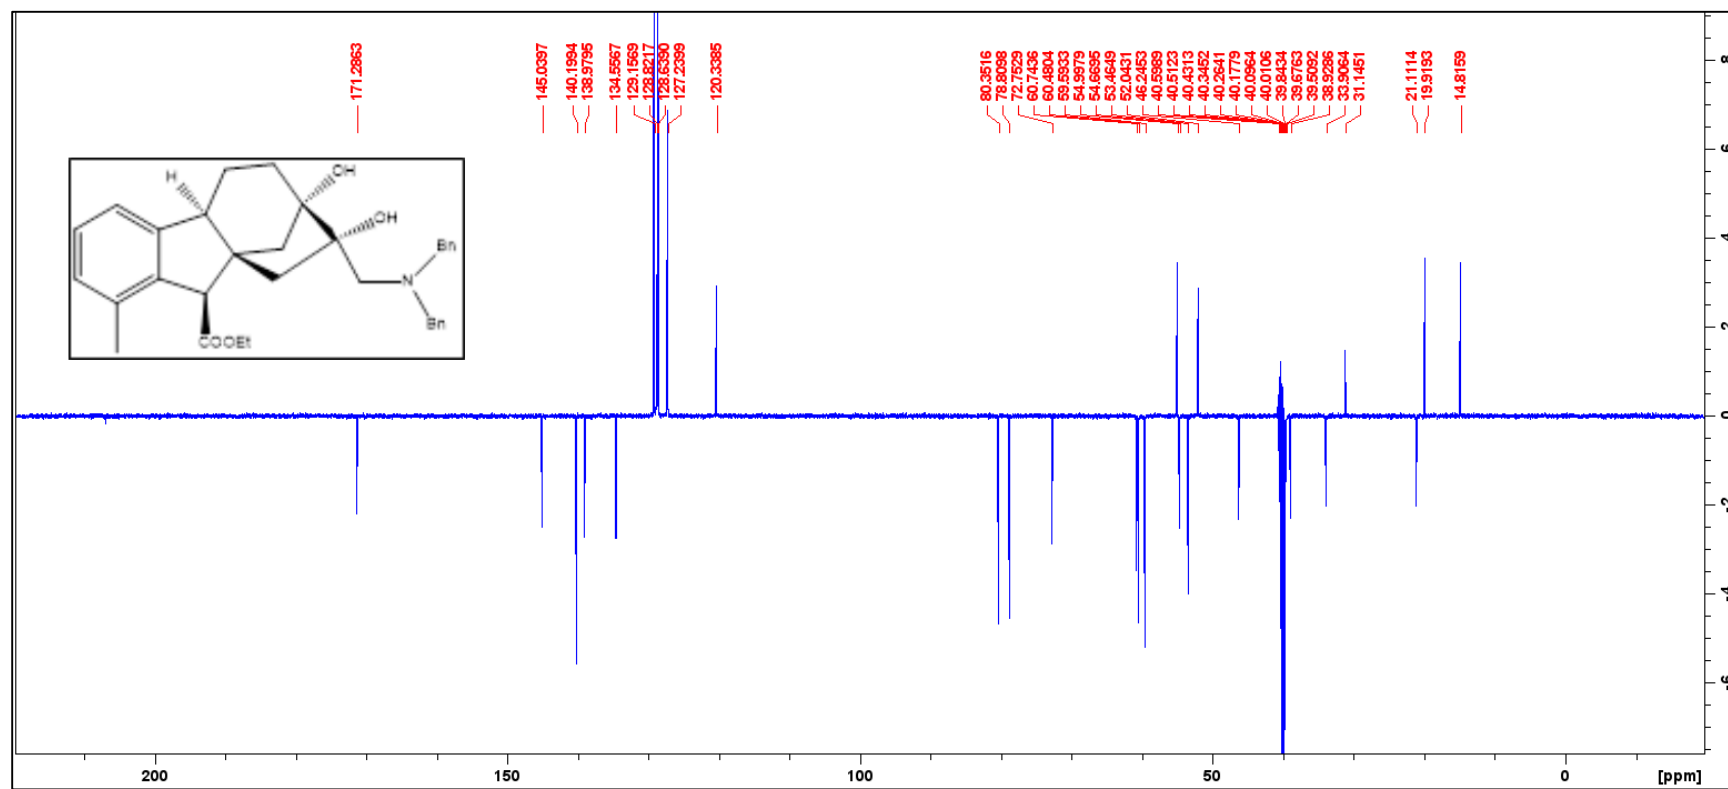

Figure S 42:  $^1\text{H}$ -NMR of compound 18

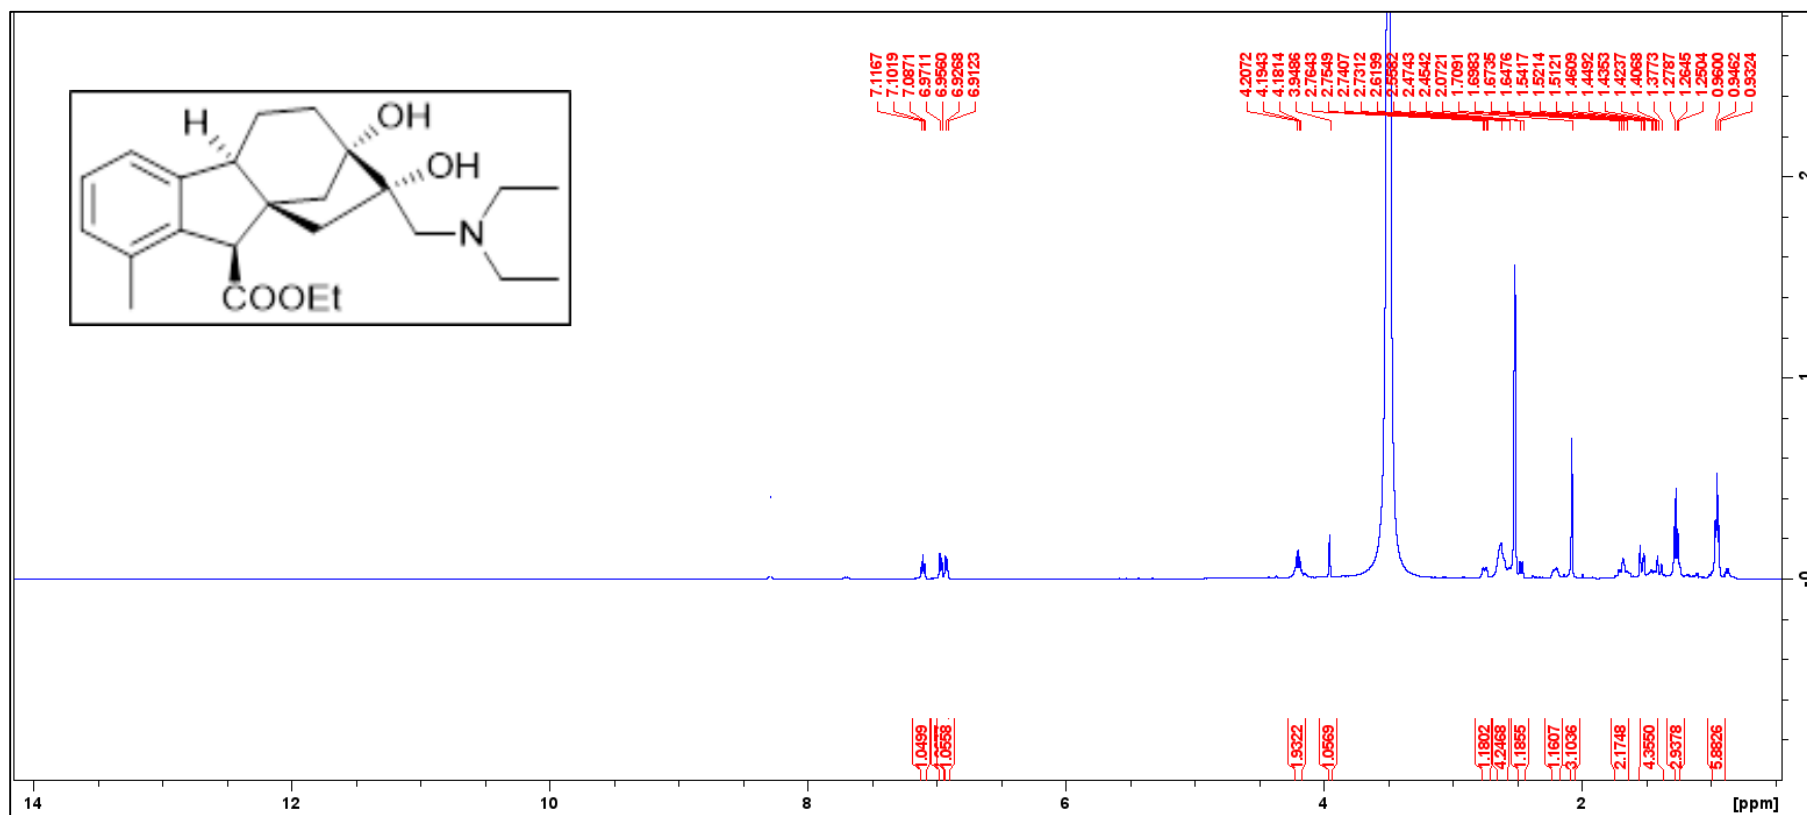

Figure S 43:  $^{13}\text{C}$ -NMR (JMOD) of compound 18

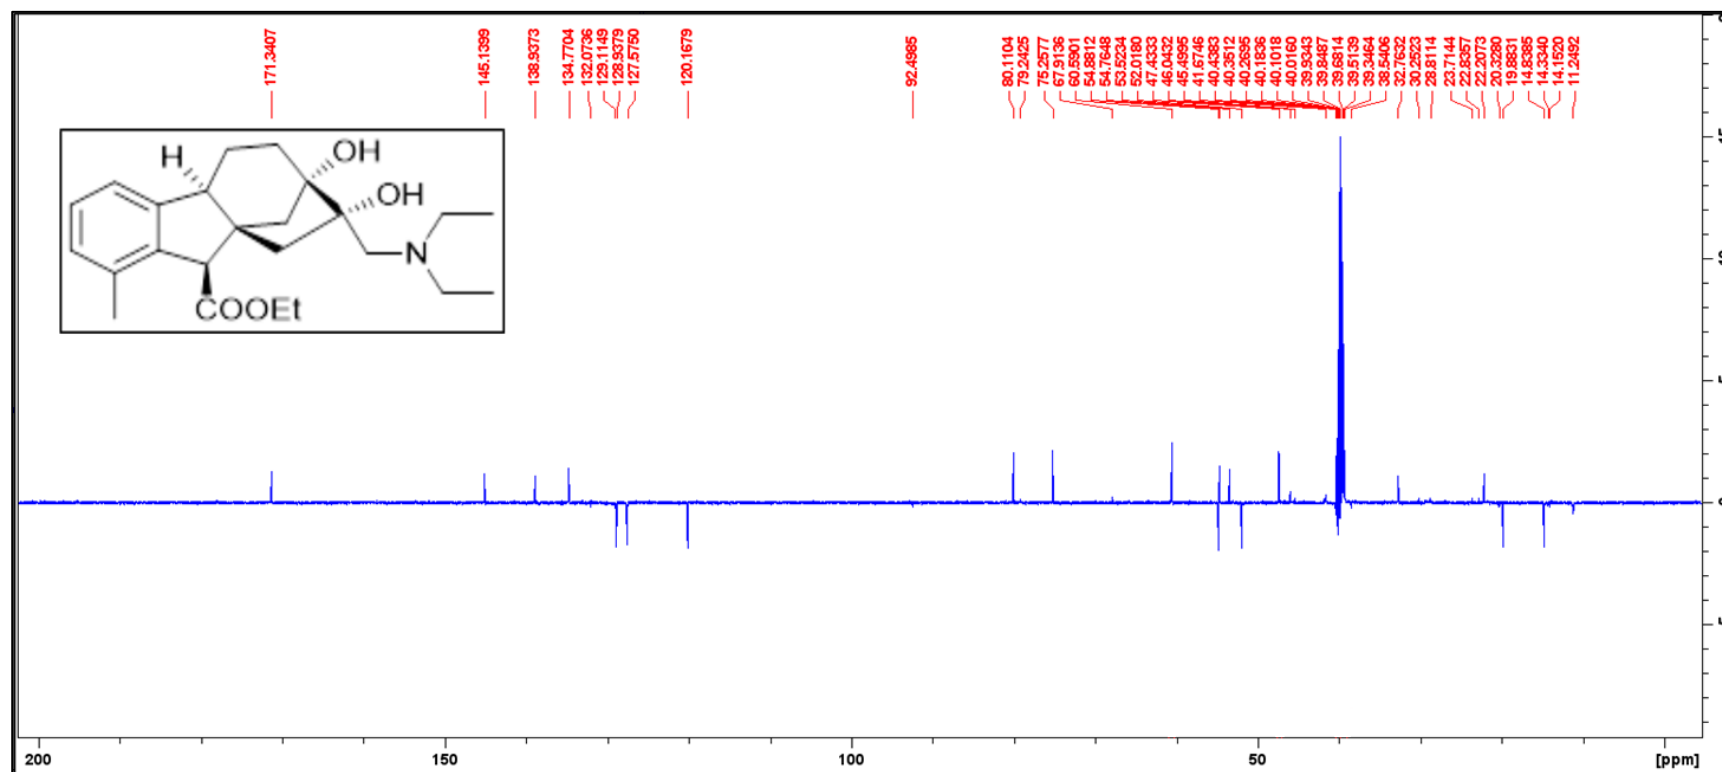



Figure S 44:  $^1\text{H}$ -NMR of compound 19

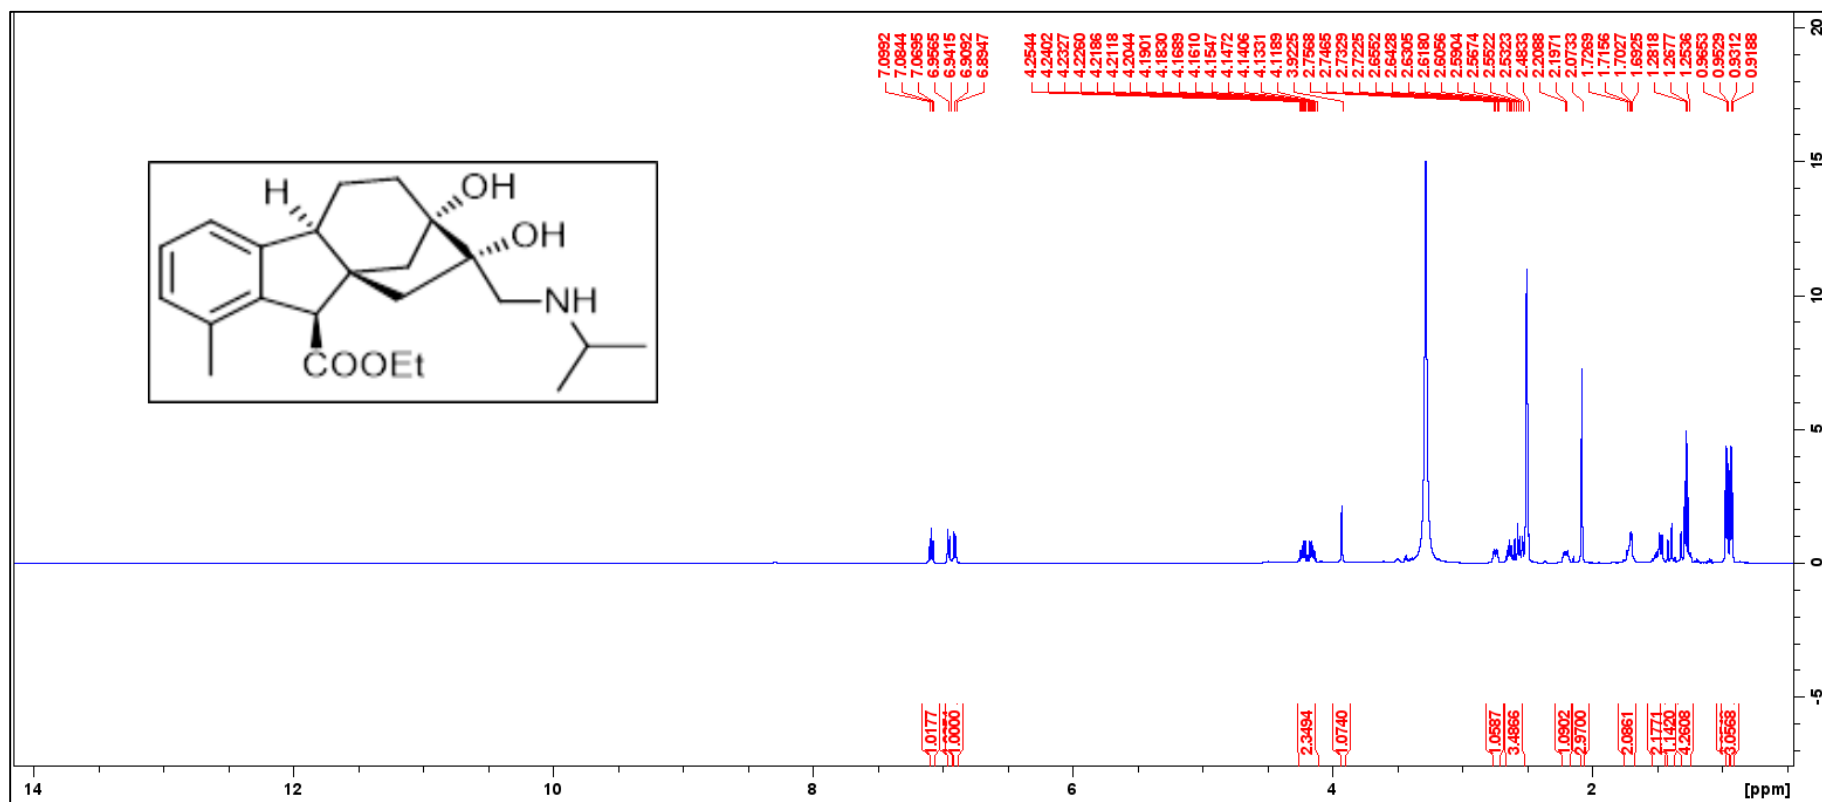

Figure S 45:  $^{13}\text{C}$ -NMR (JMOD) of compound 19

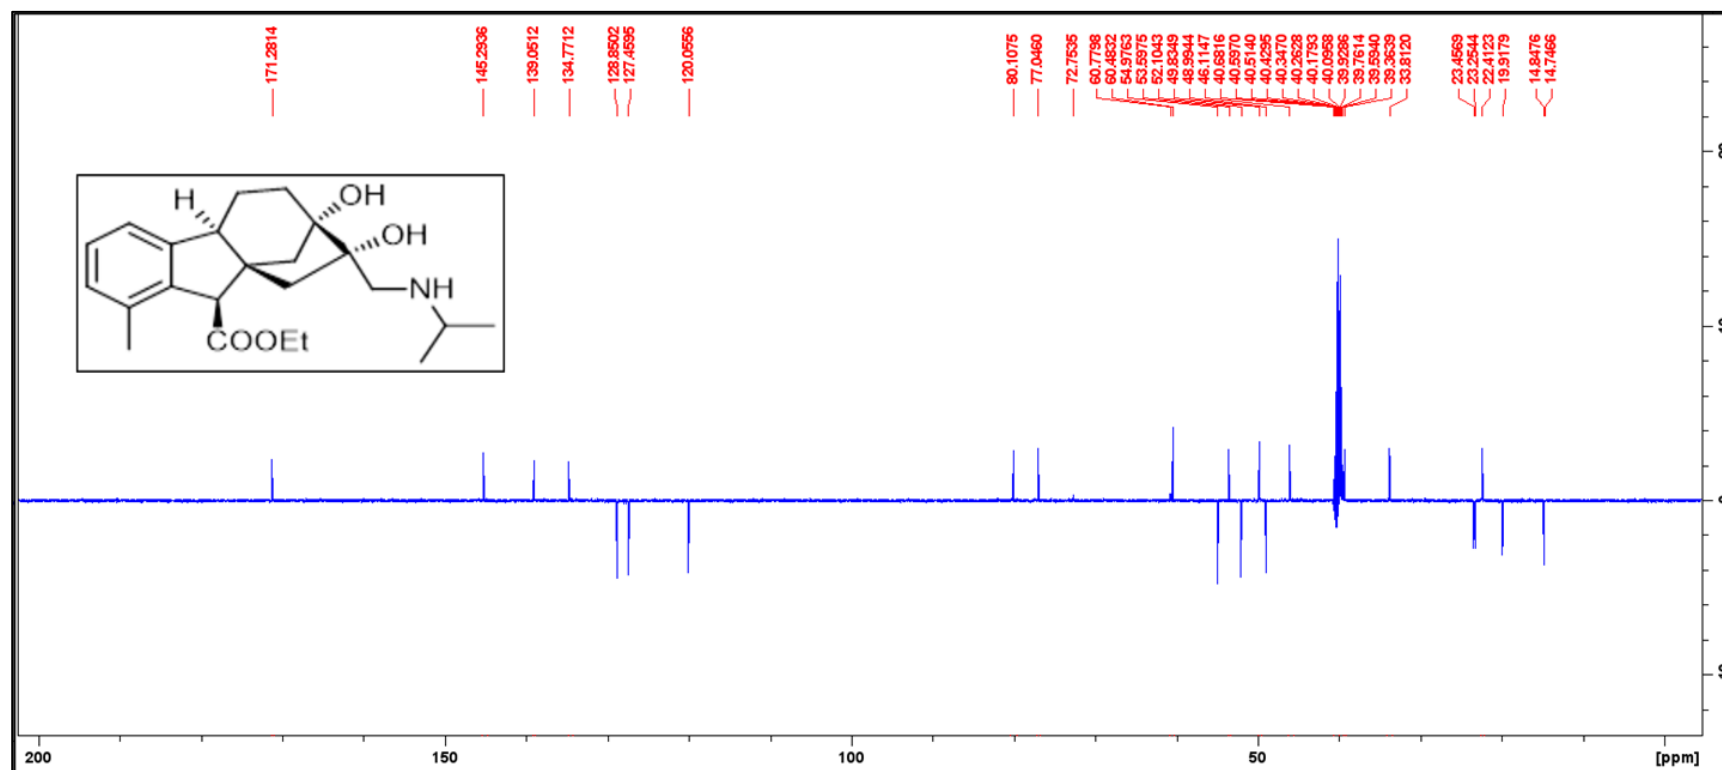

Figure S 46:  $^1\text{H}$ -NMR of compound 20

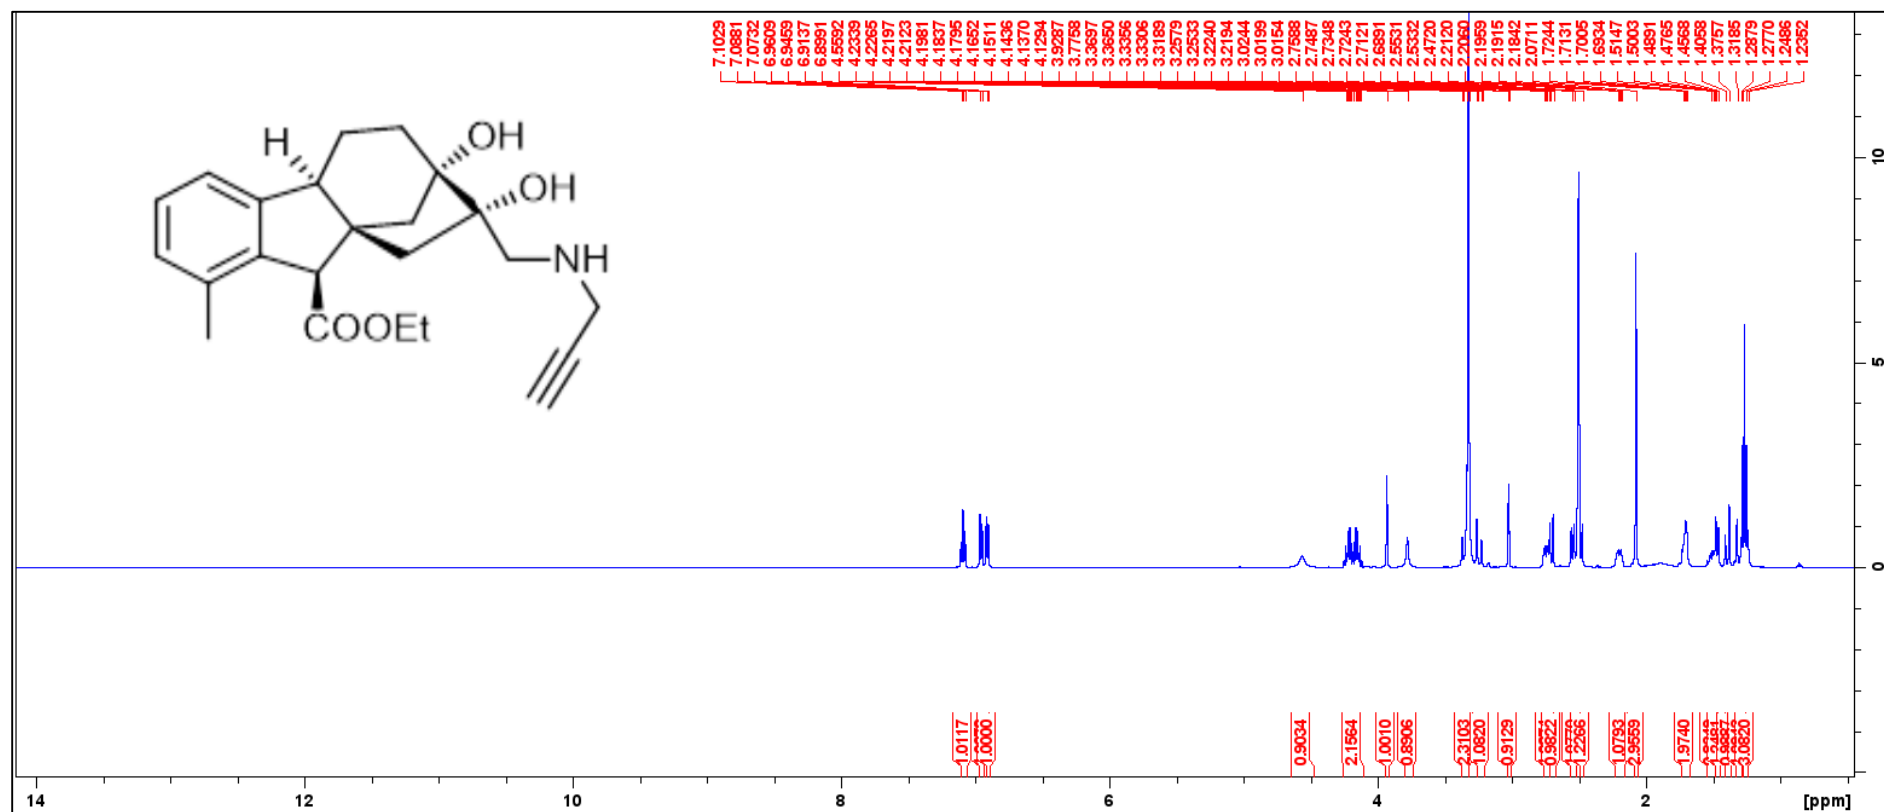

Figure S 47:  $^{13}\text{C}$ -NMR (JMOD) of compound 20

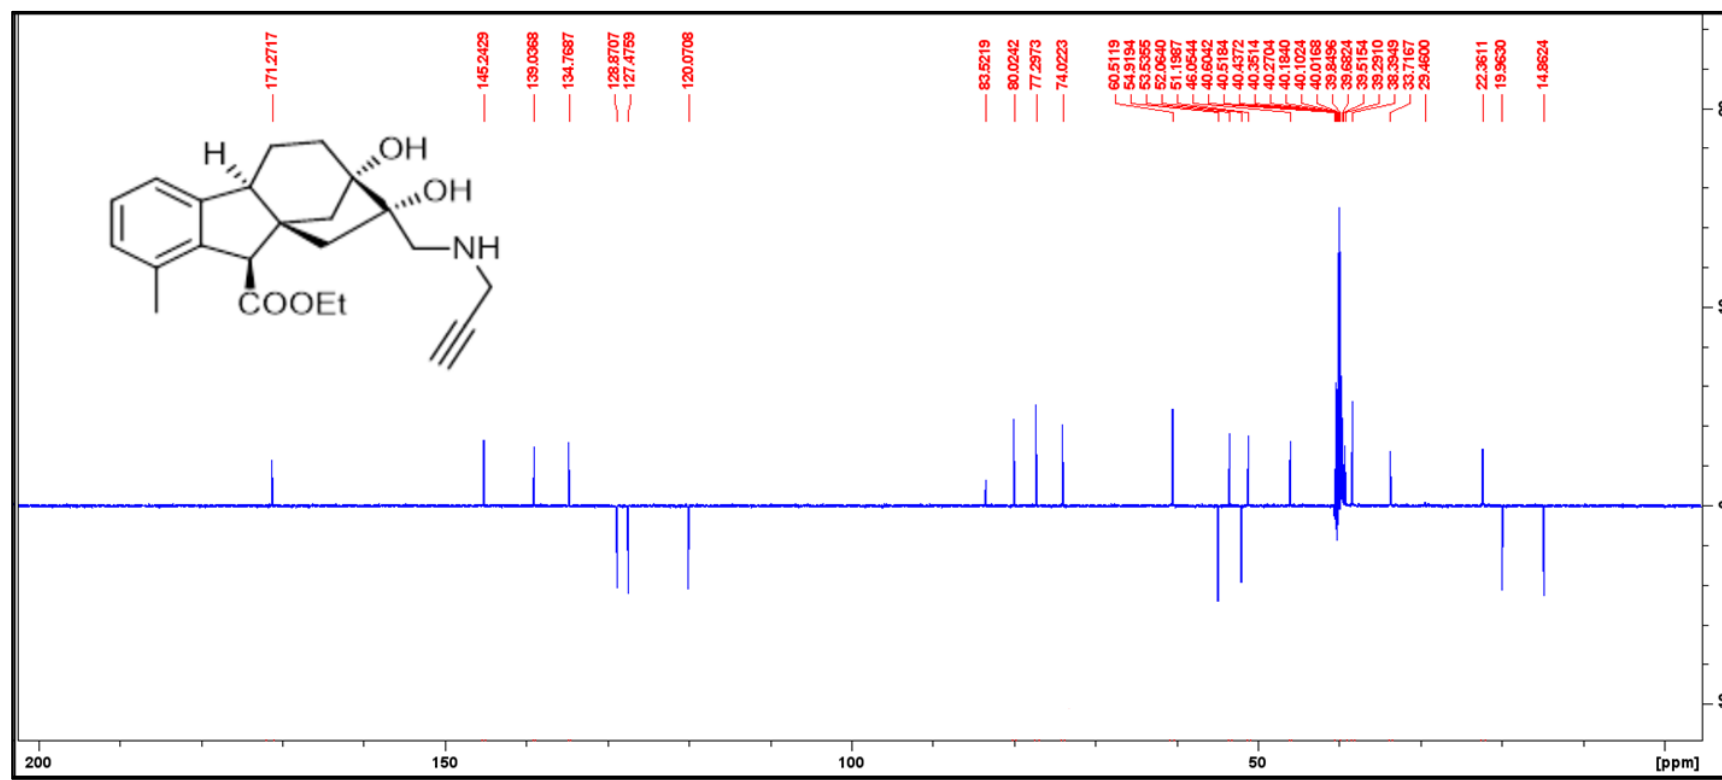

Figure S 48:  $^1\text{H}$ -NMR of compound 21

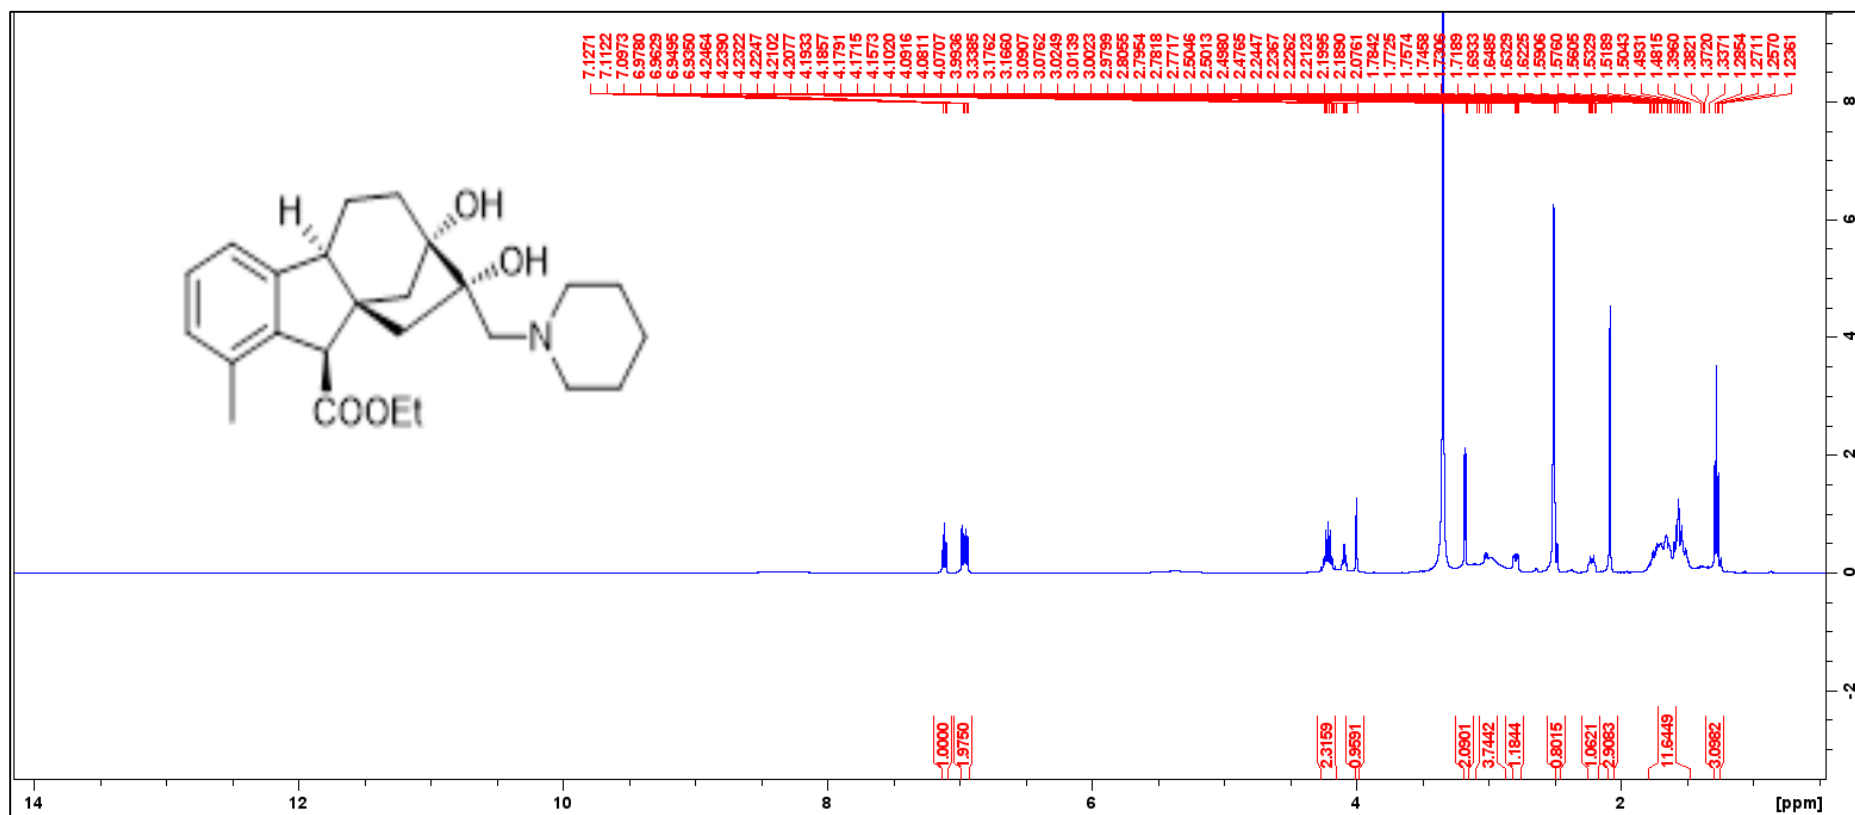

Figure S 49:  $^{13}\text{C}$ -NMR (JMOD) of compound 21

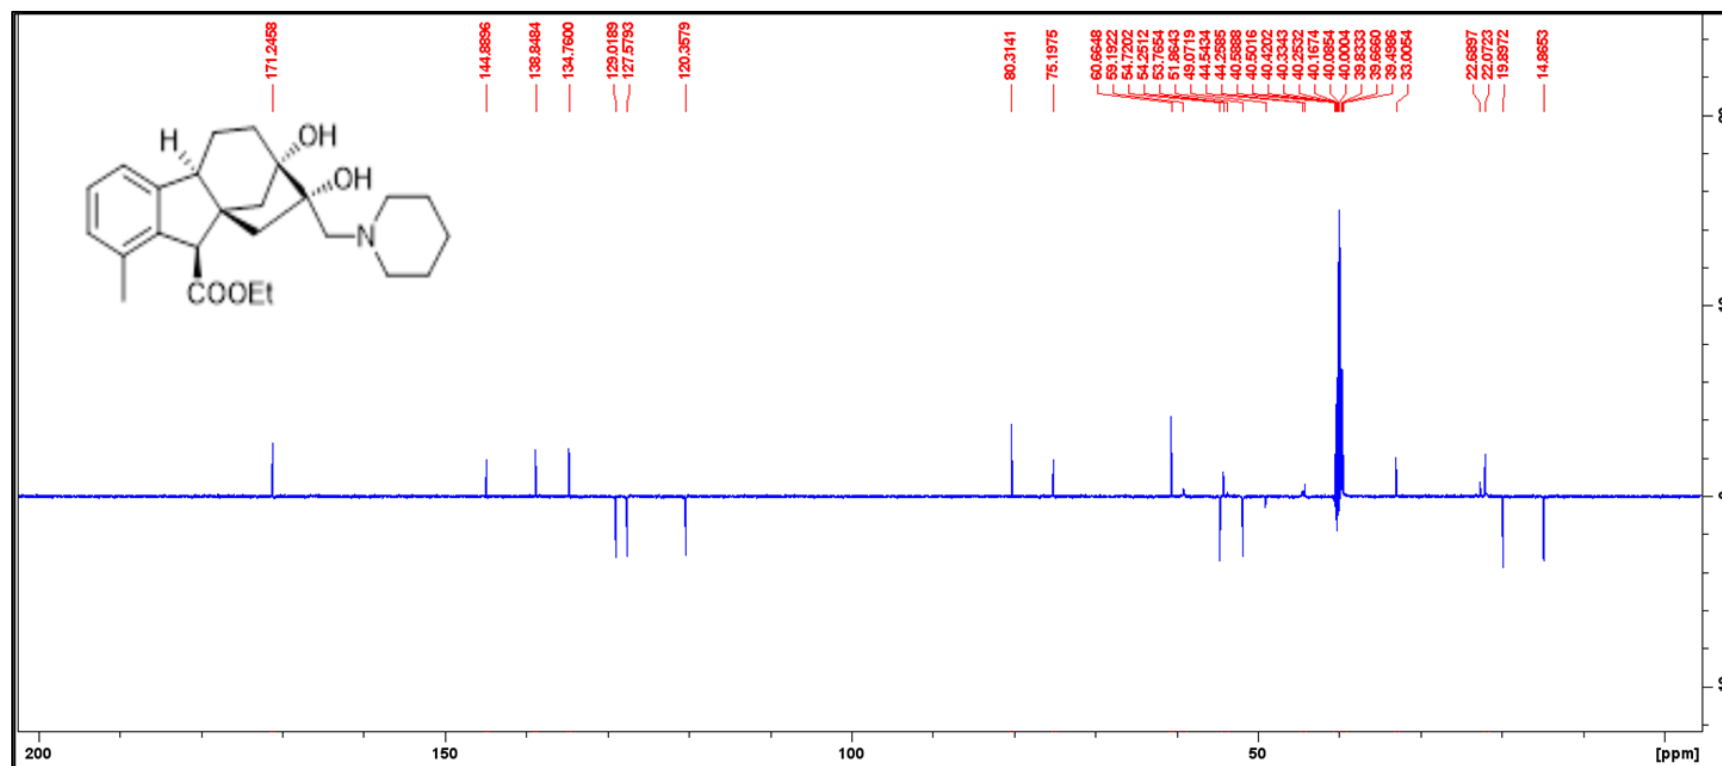

Figure S 50: <sup>1</sup>H-NMR of compound 22

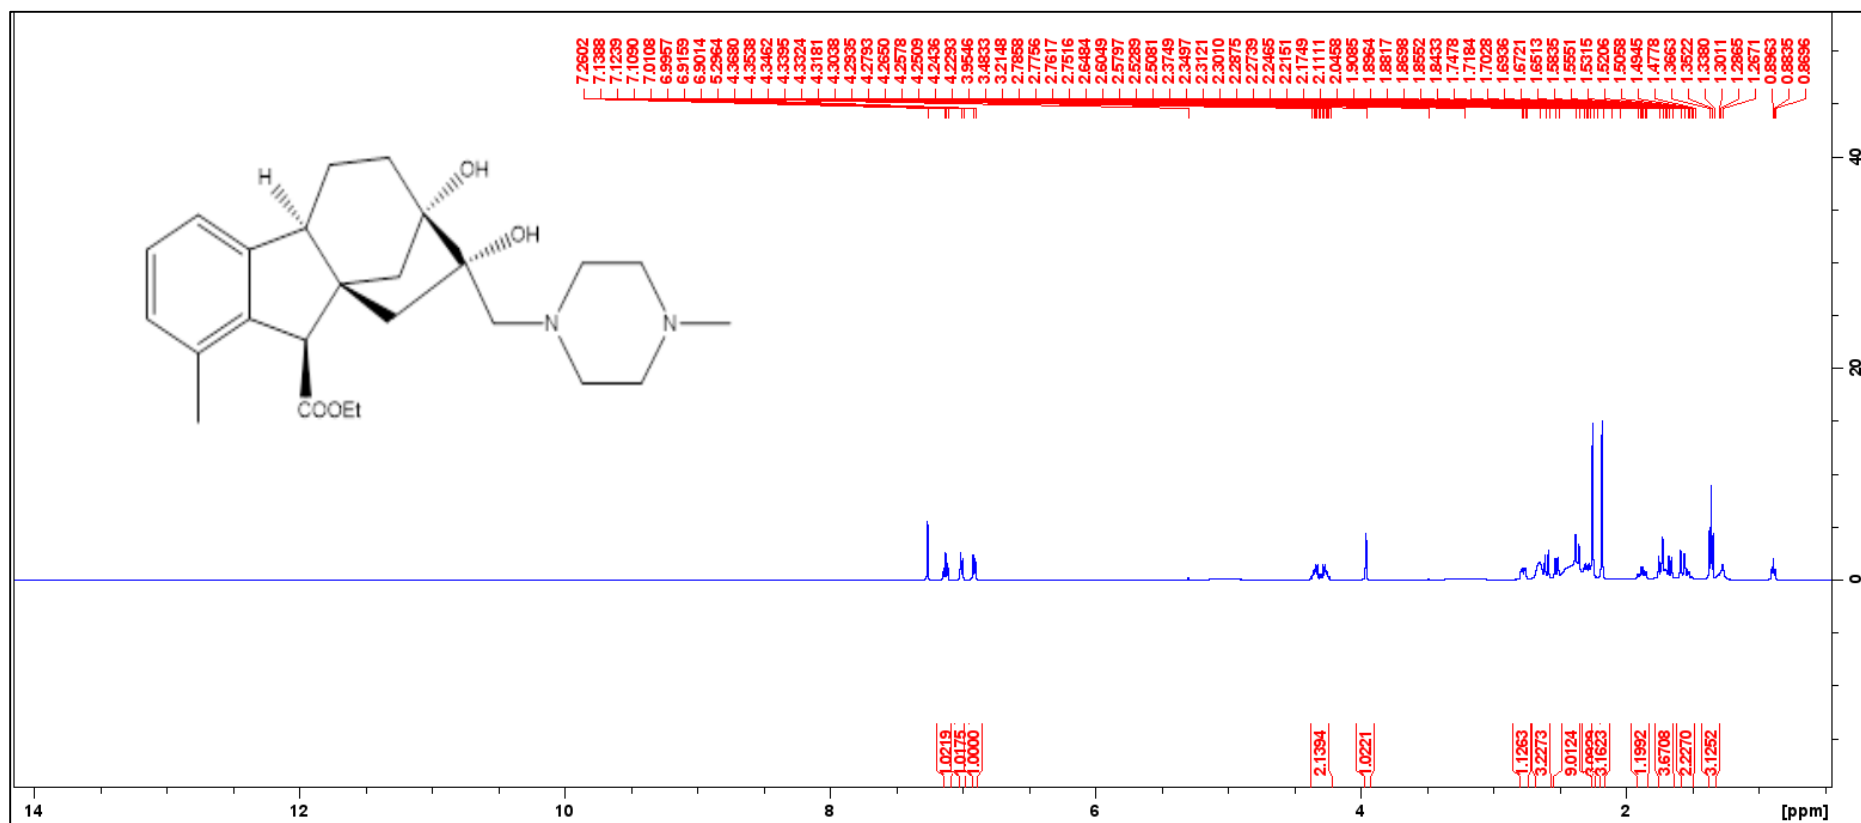

Figure S 51:  $^{13}\text{C}$ -NMR (JMOD) of compound 22

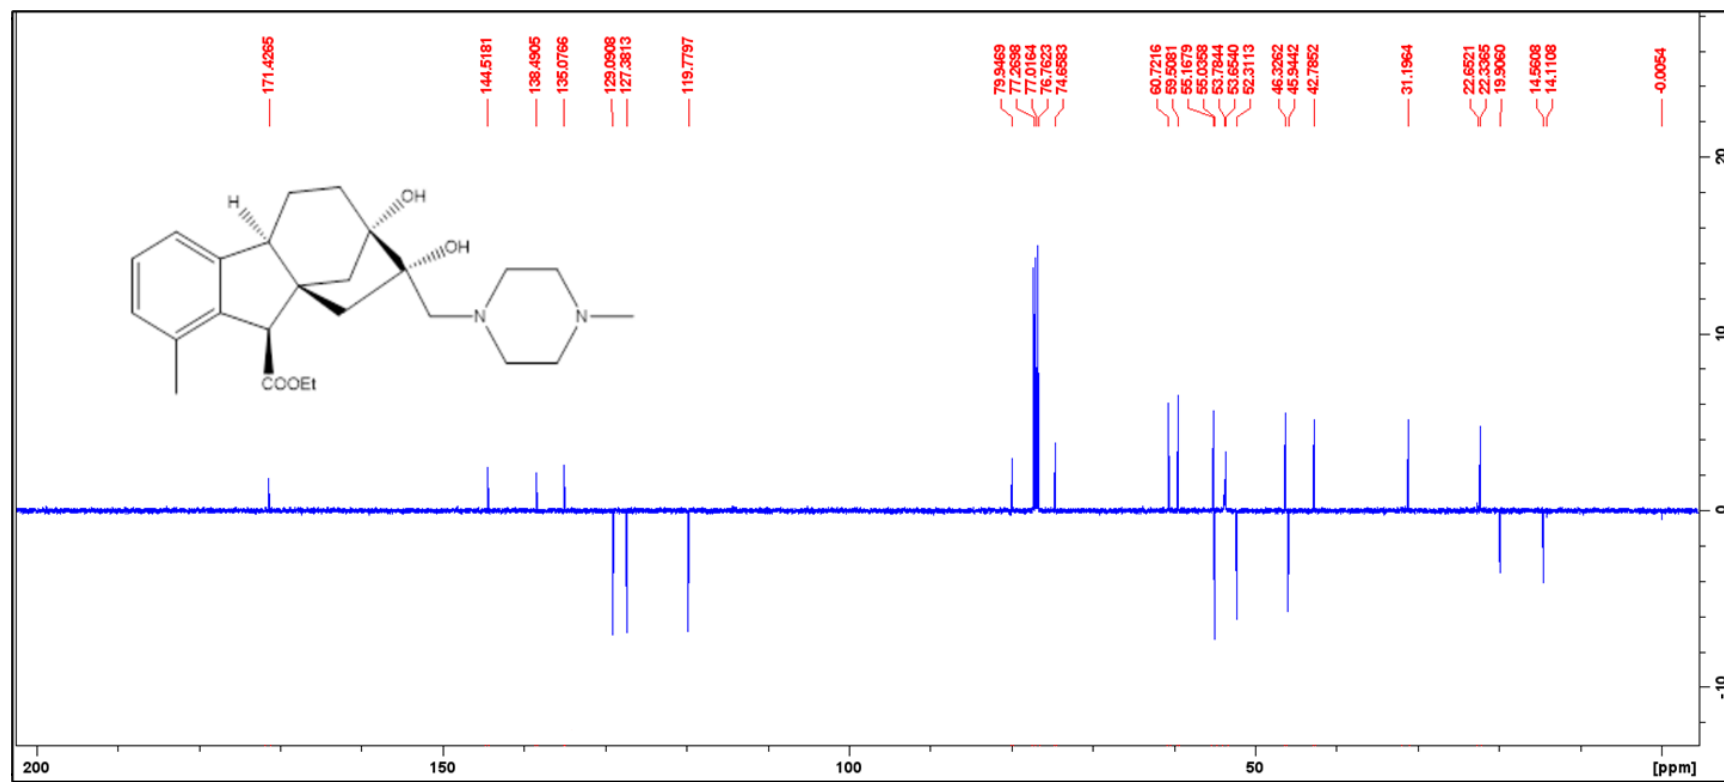



Figure S 52:  $^1\text{H}$ -NMR of compound 23

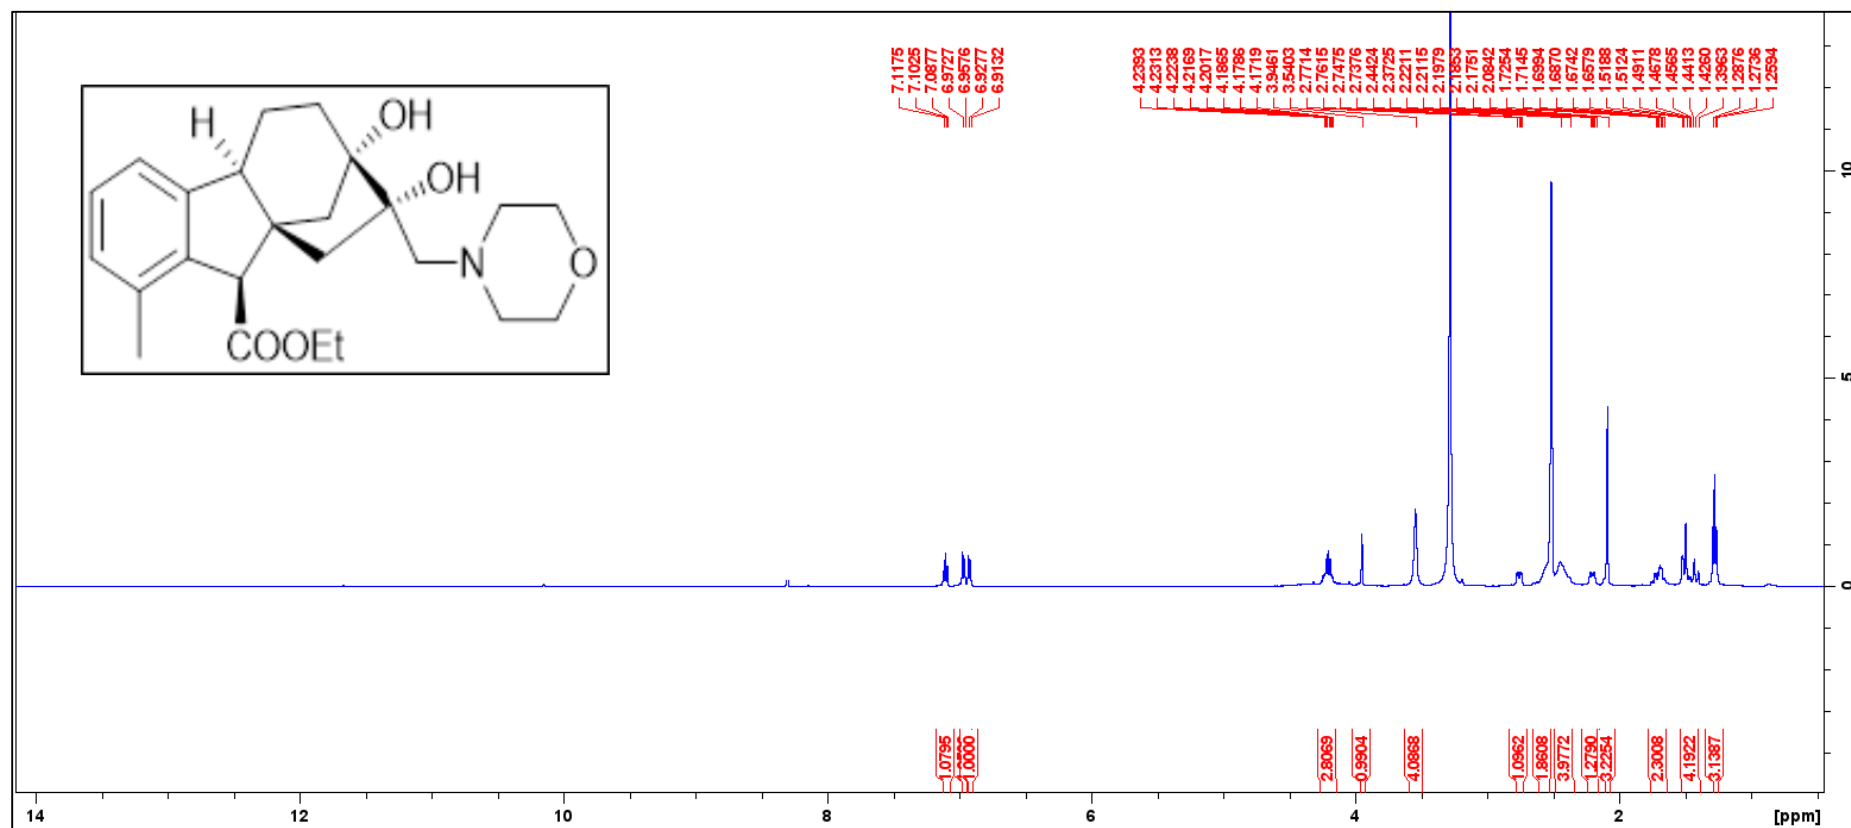

Figure S 53:  $^{13}\text{C}$ -NMR (JMOD) of compound 23

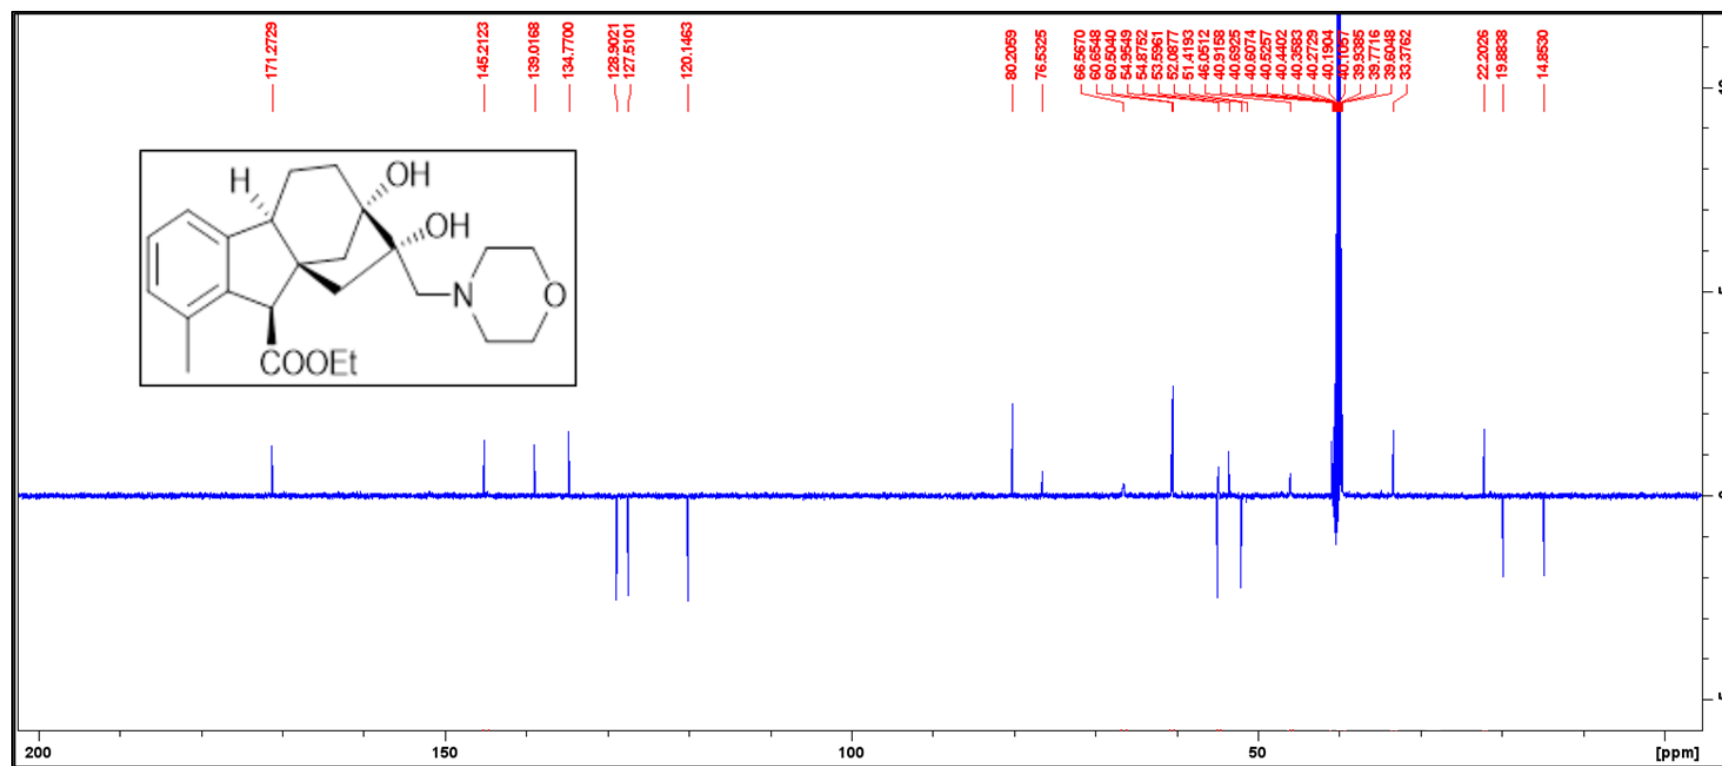

Figure S 54:  $^1\text{H}$ -NMR of compound 24

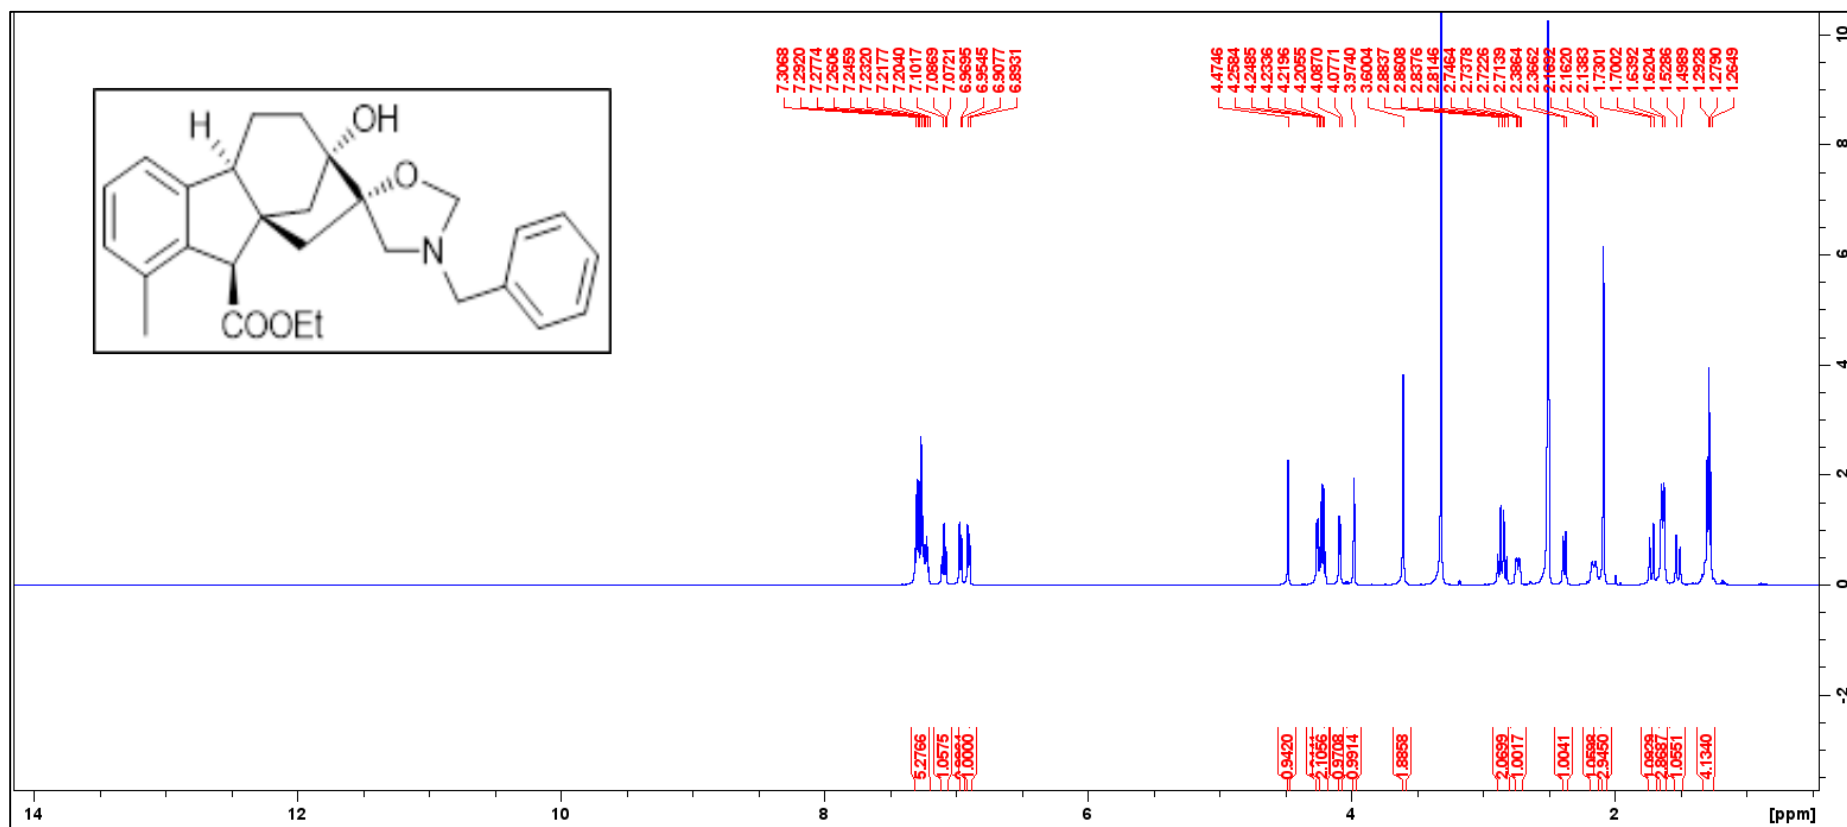

Figure S 55:  $^{13}\text{C}$ -NMR (JMOD) of compound 24

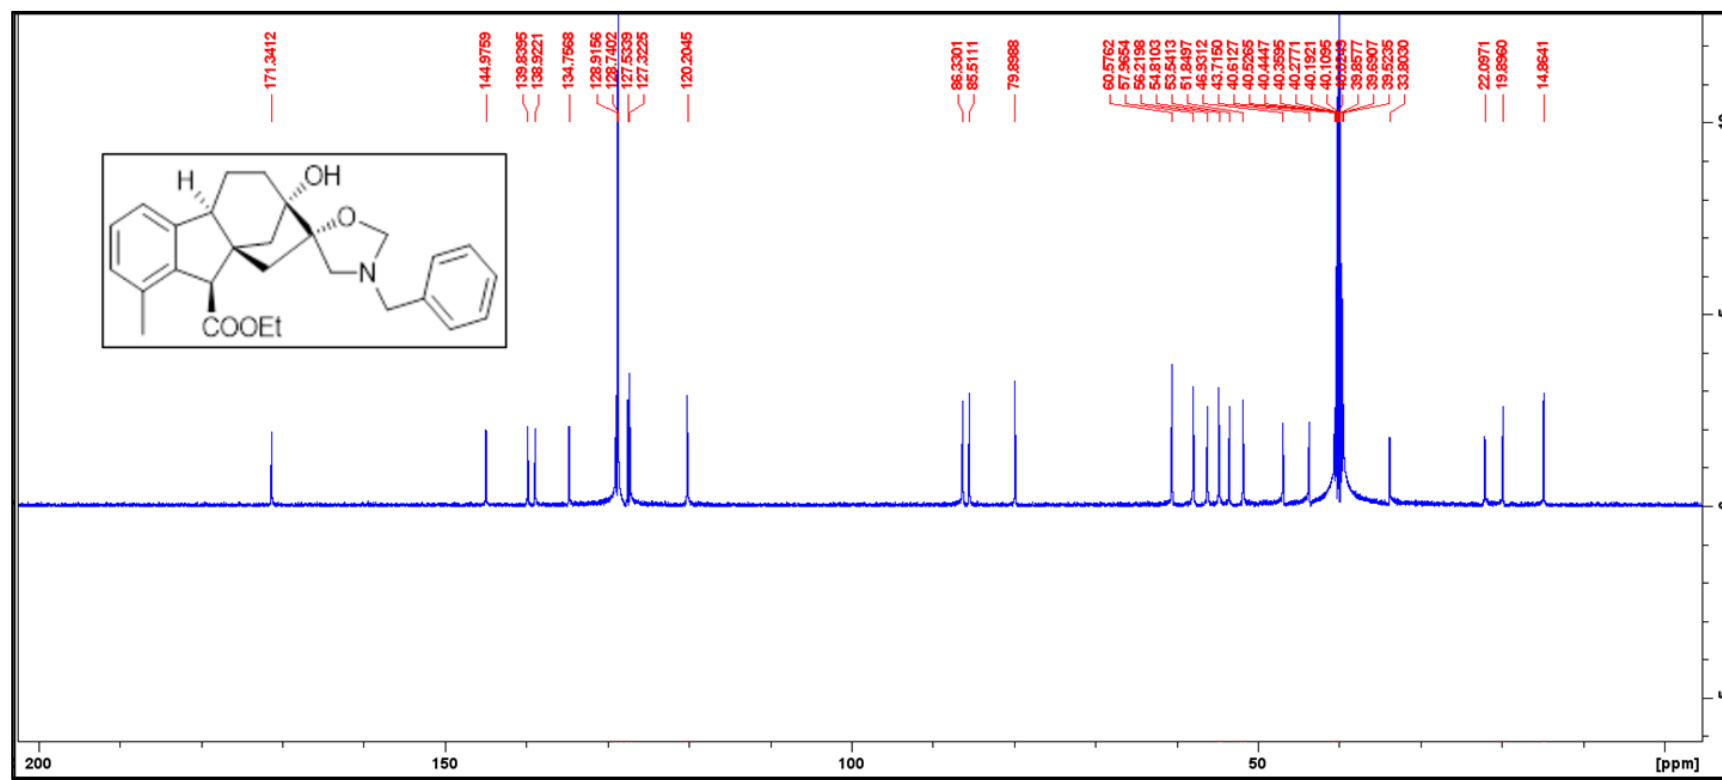

Figure S 56:  $^1\text{H}$ -NMR of compound 25

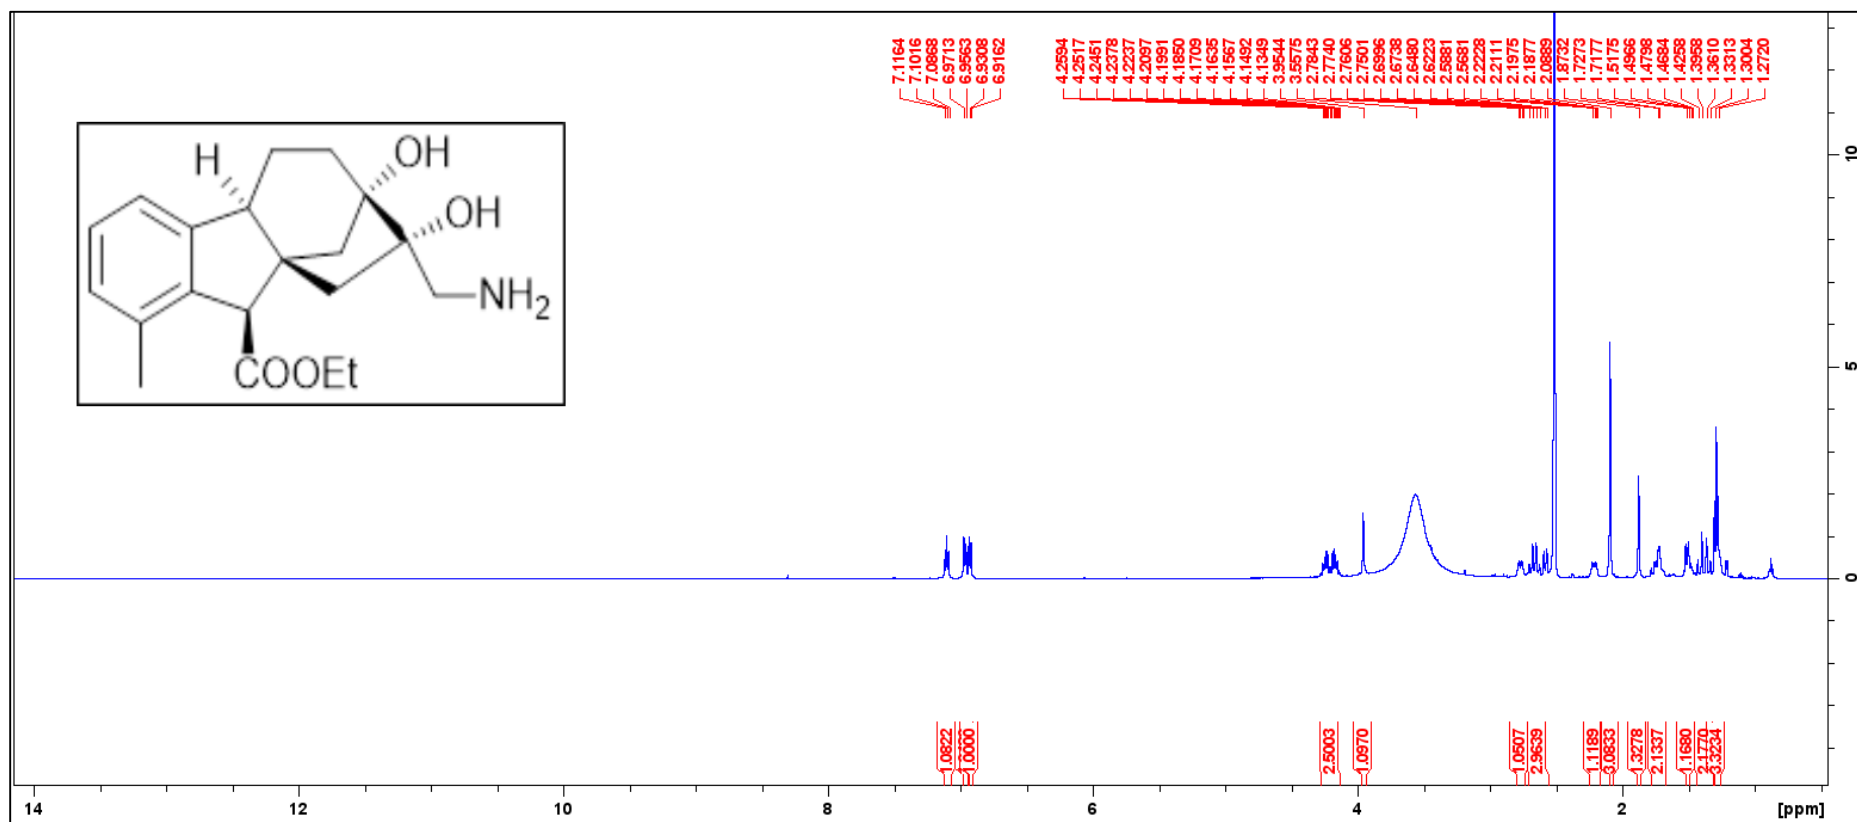

Figure S 57:  $^{13}\text{C}$ -NMR (JMOD) of compound 25

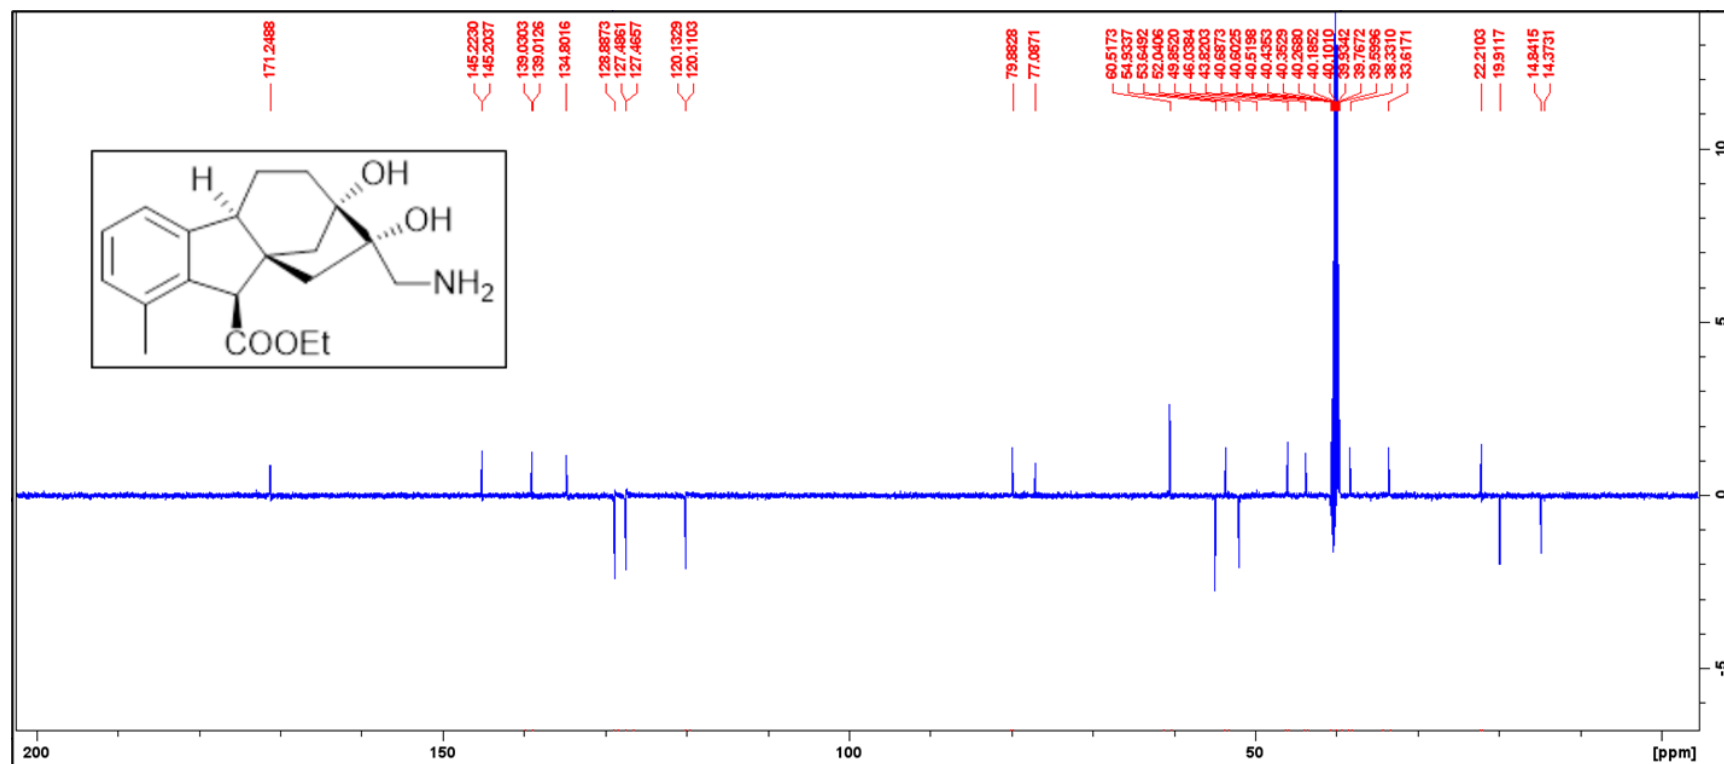

Figure S 58:  $^1\text{H}$ -NMR of compound 26

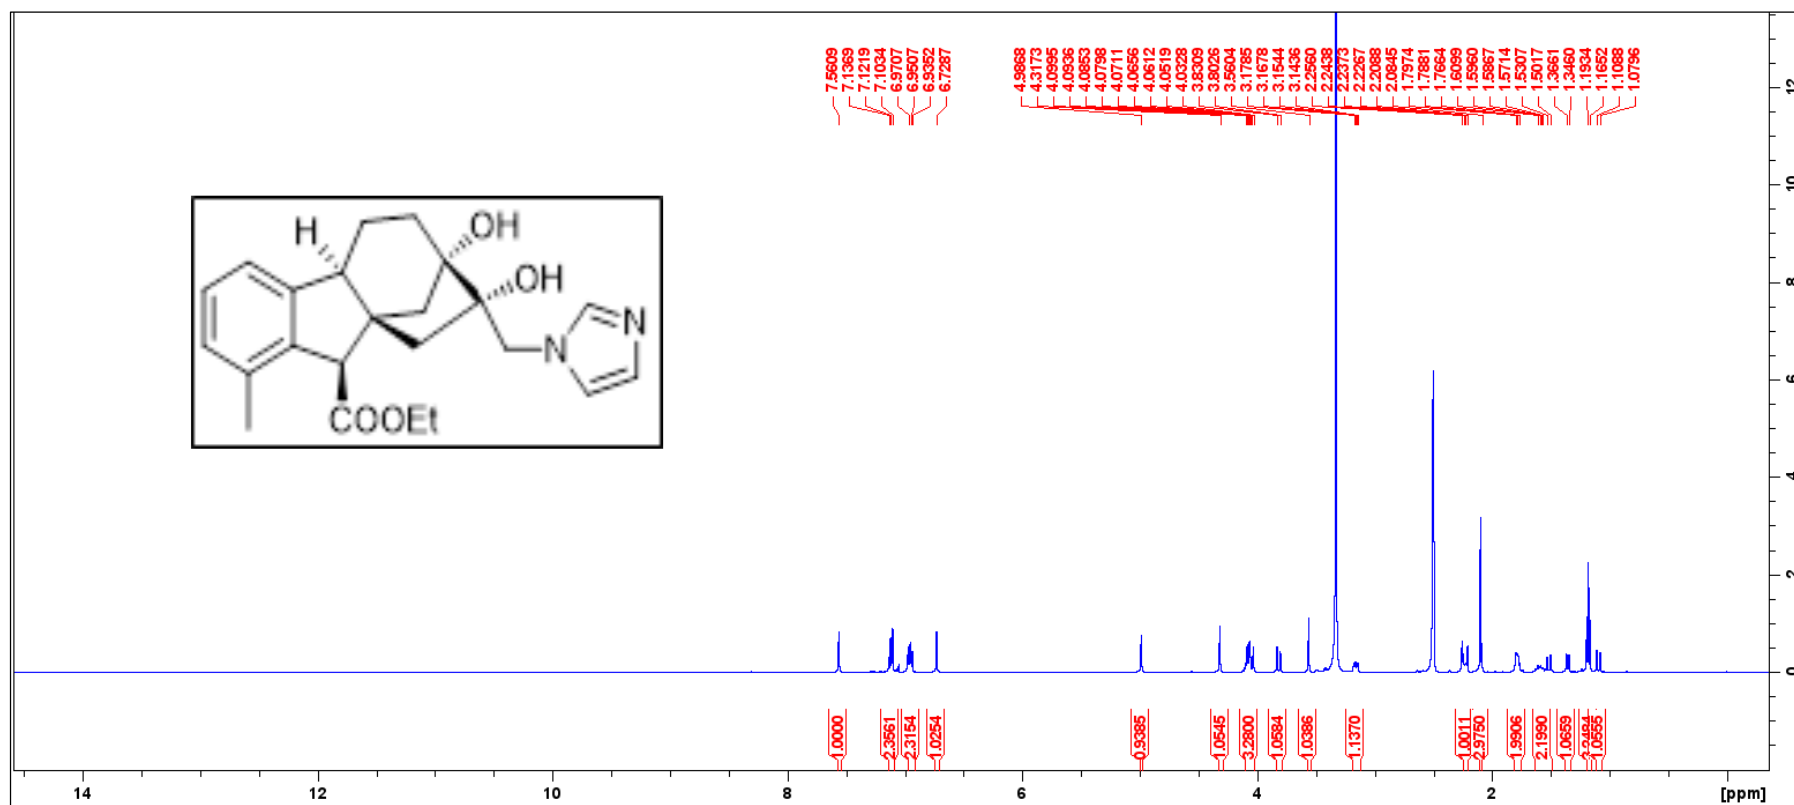

Figure S 59:  $^{13}\text{C}$ -NMR (JMOD) of compound 26

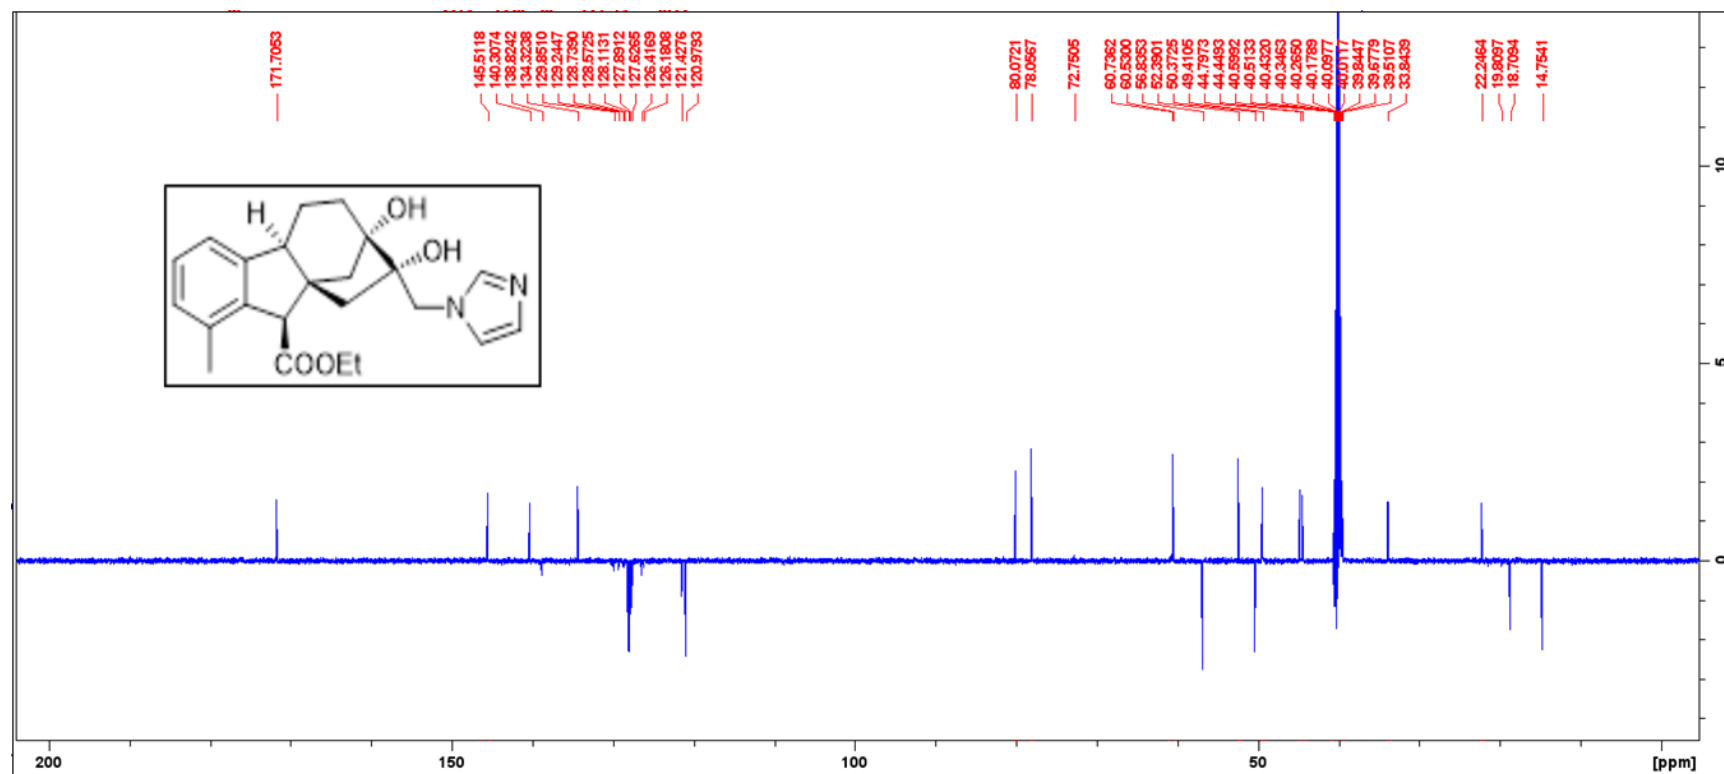



Figure S 60: <sup>1</sup>H-NMR of compound 27

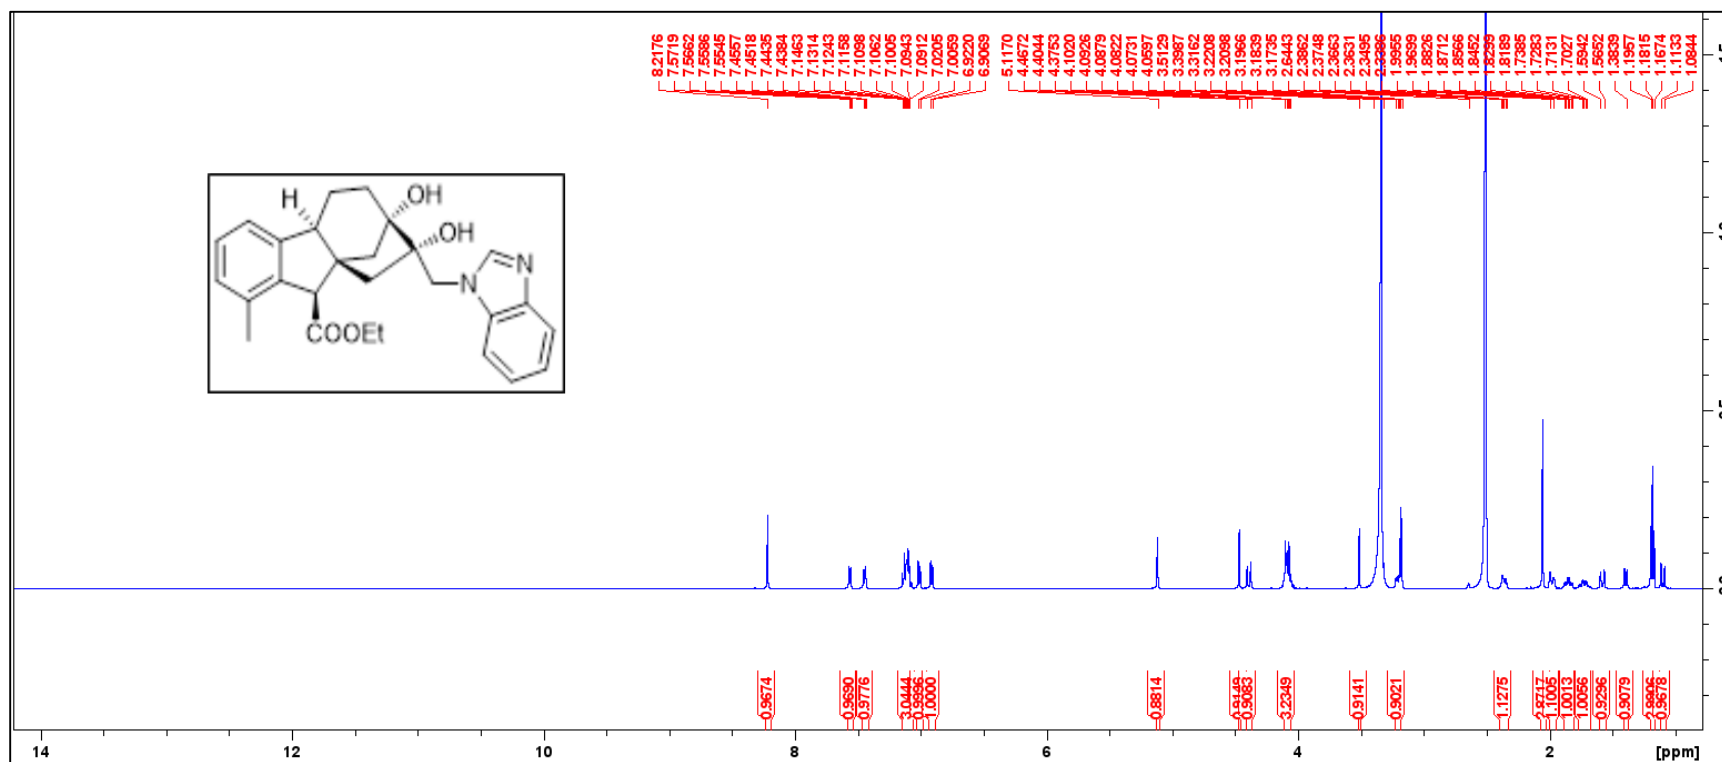

Figure S 61:  $^{13}\text{C}$ -NMR (JMOD) of compound 27

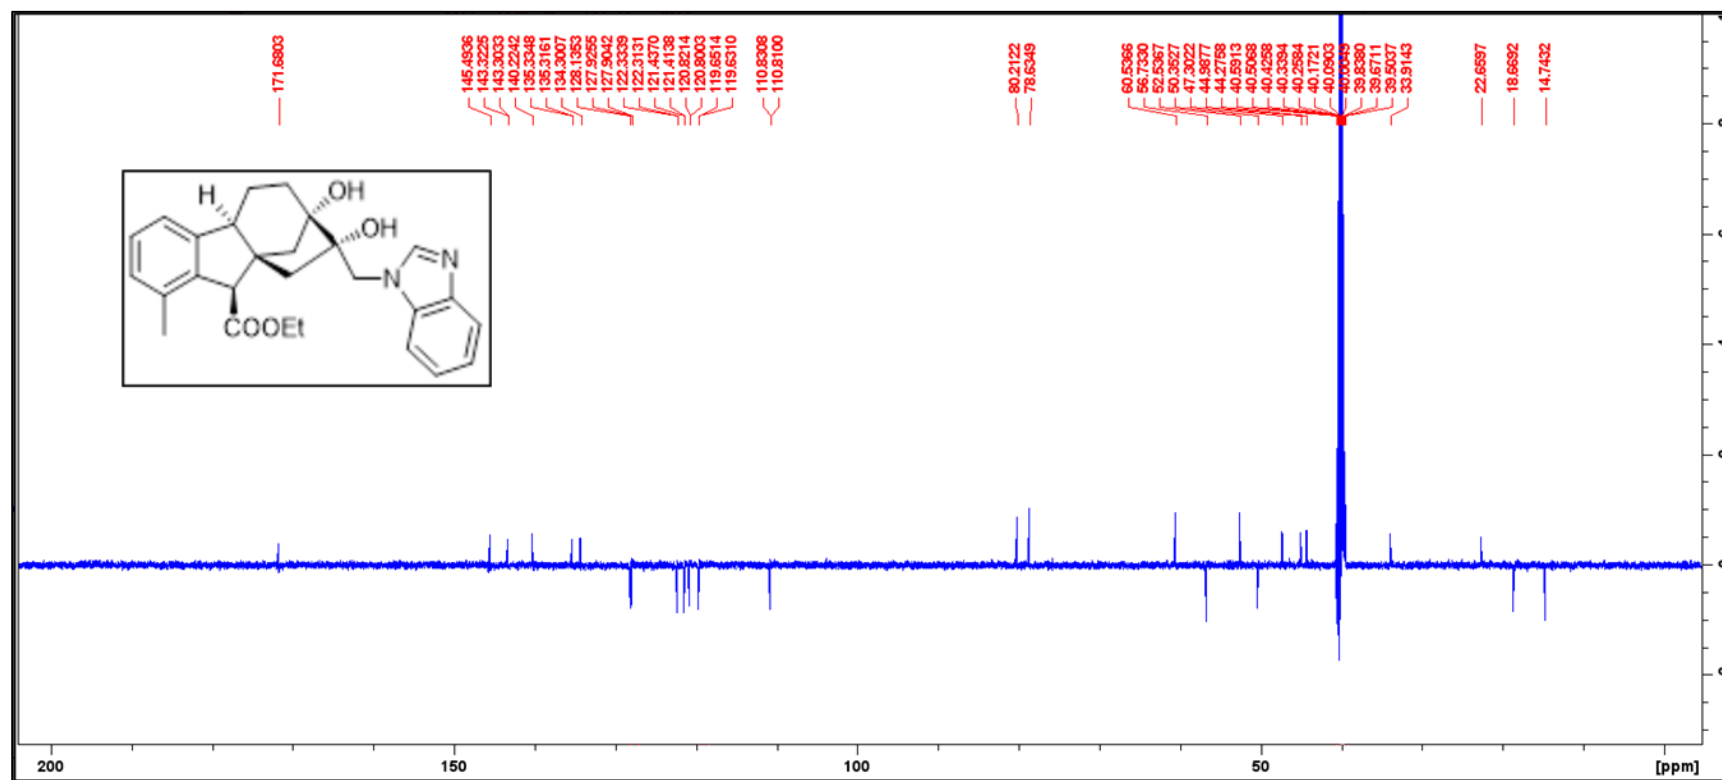

Figure S 62:  $^1\text{H}$ -NMR of compound 28

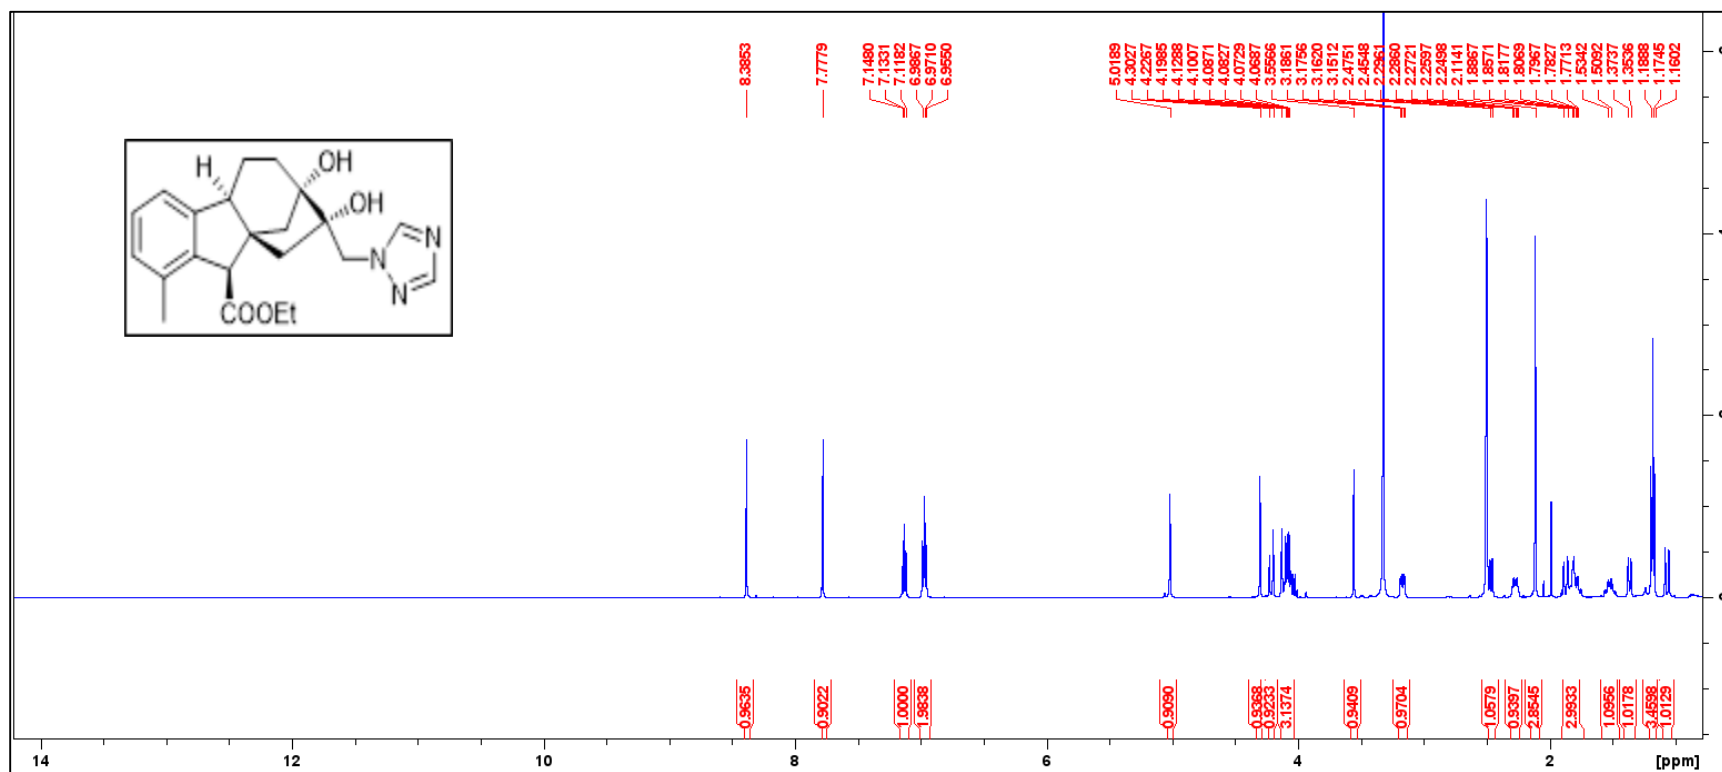

Figure S 63:  $^{13}\text{C}$ -NMR (JMOD) of compound 28

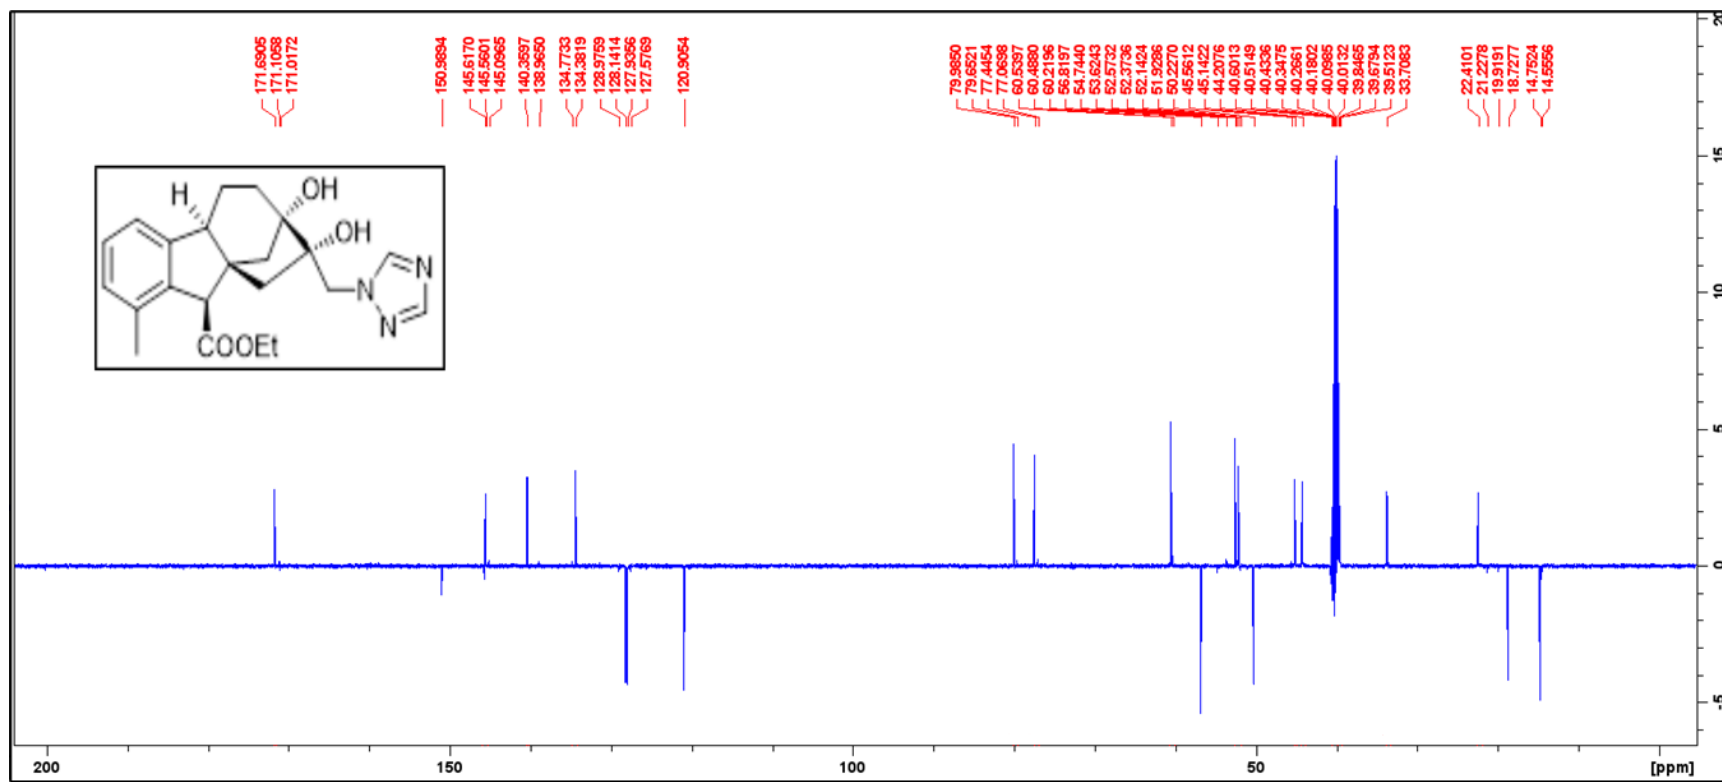

Figure S 64:  $^1\text{H}$ -NMR of compound 29

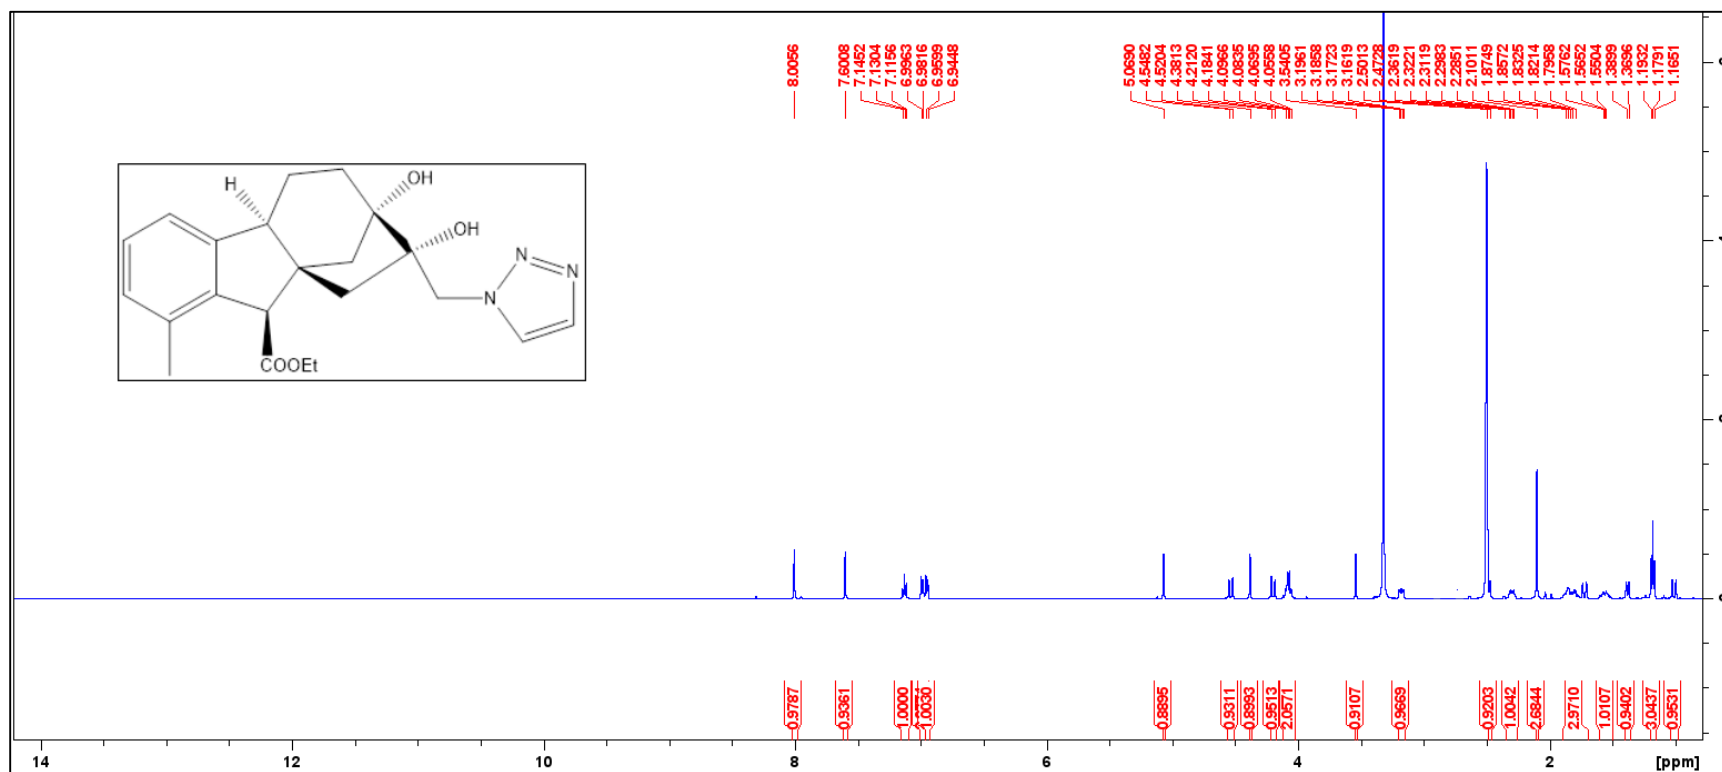

Figure S 65:  $^{13}\text{C}$ -NMR (JMOD) of compound 29

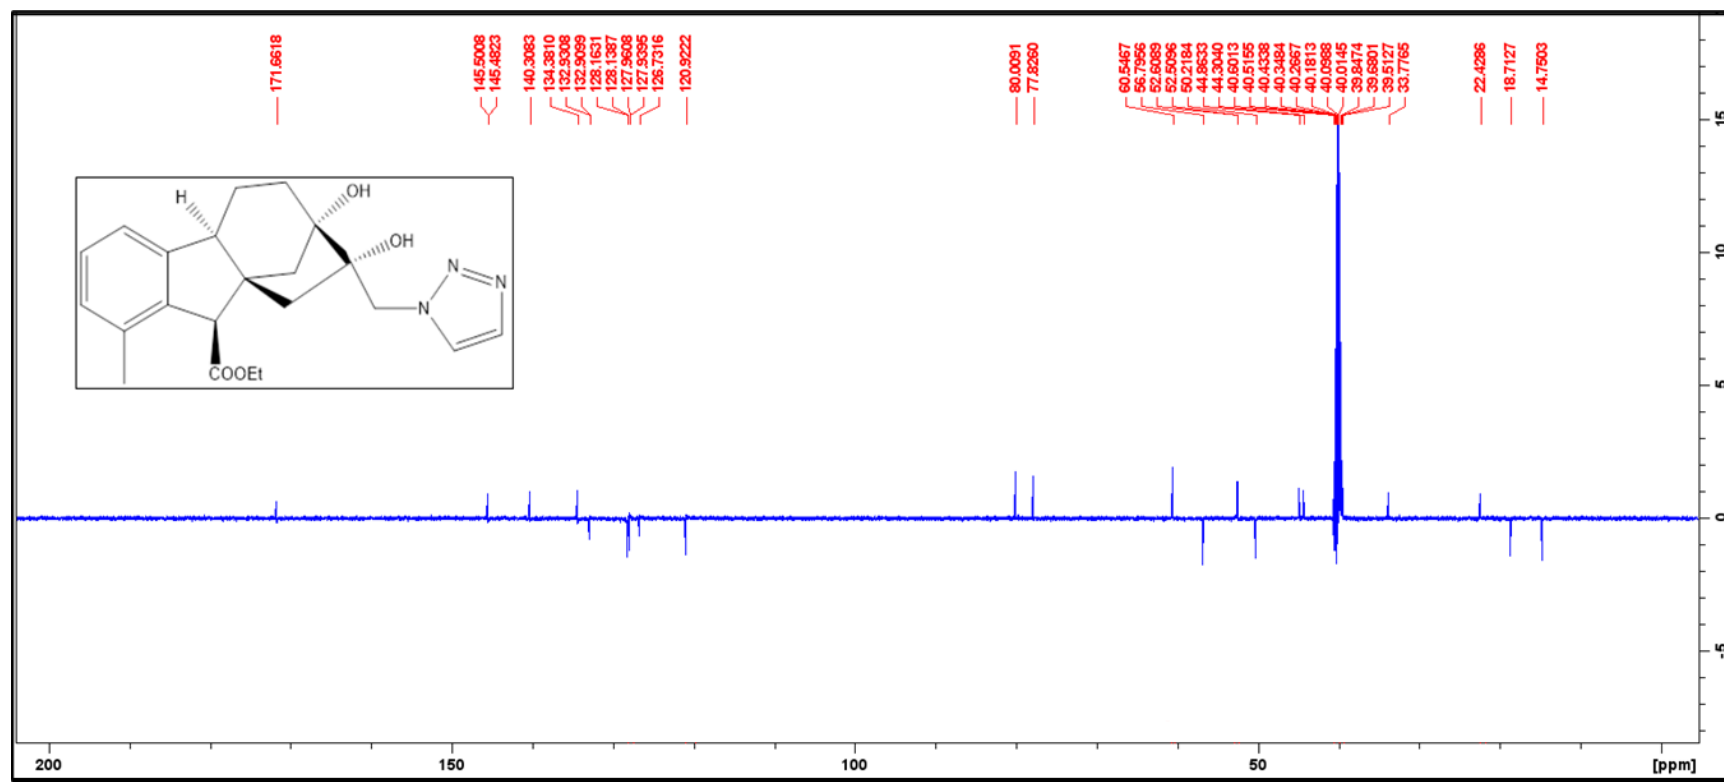

Figure S 66: <sup>1</sup>H-NMR of compound 30

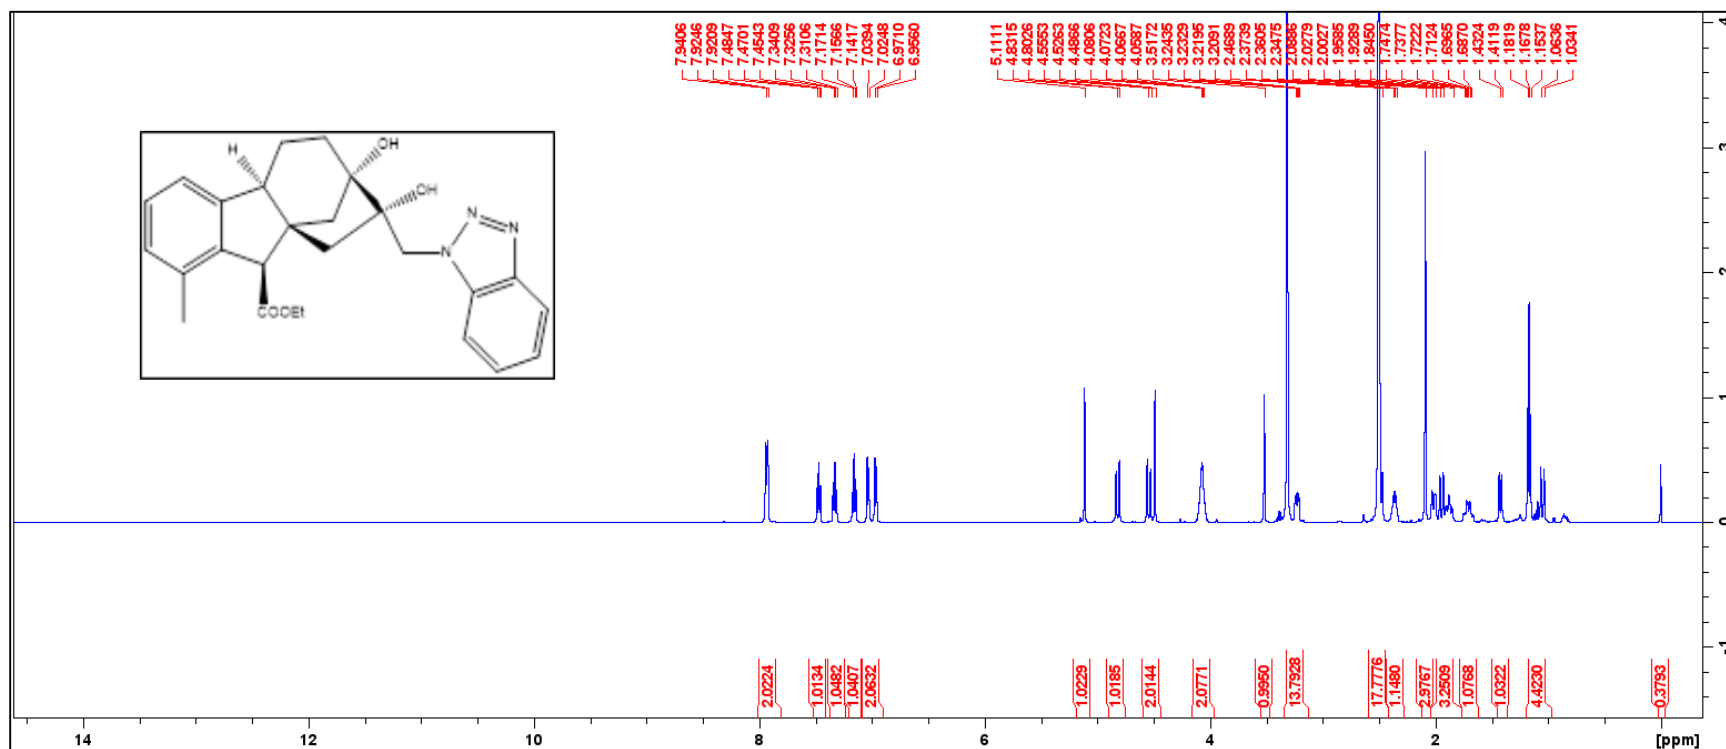

Figure S 67:  $^{13}\text{C}$ -NMR (JMOD) of compound 30

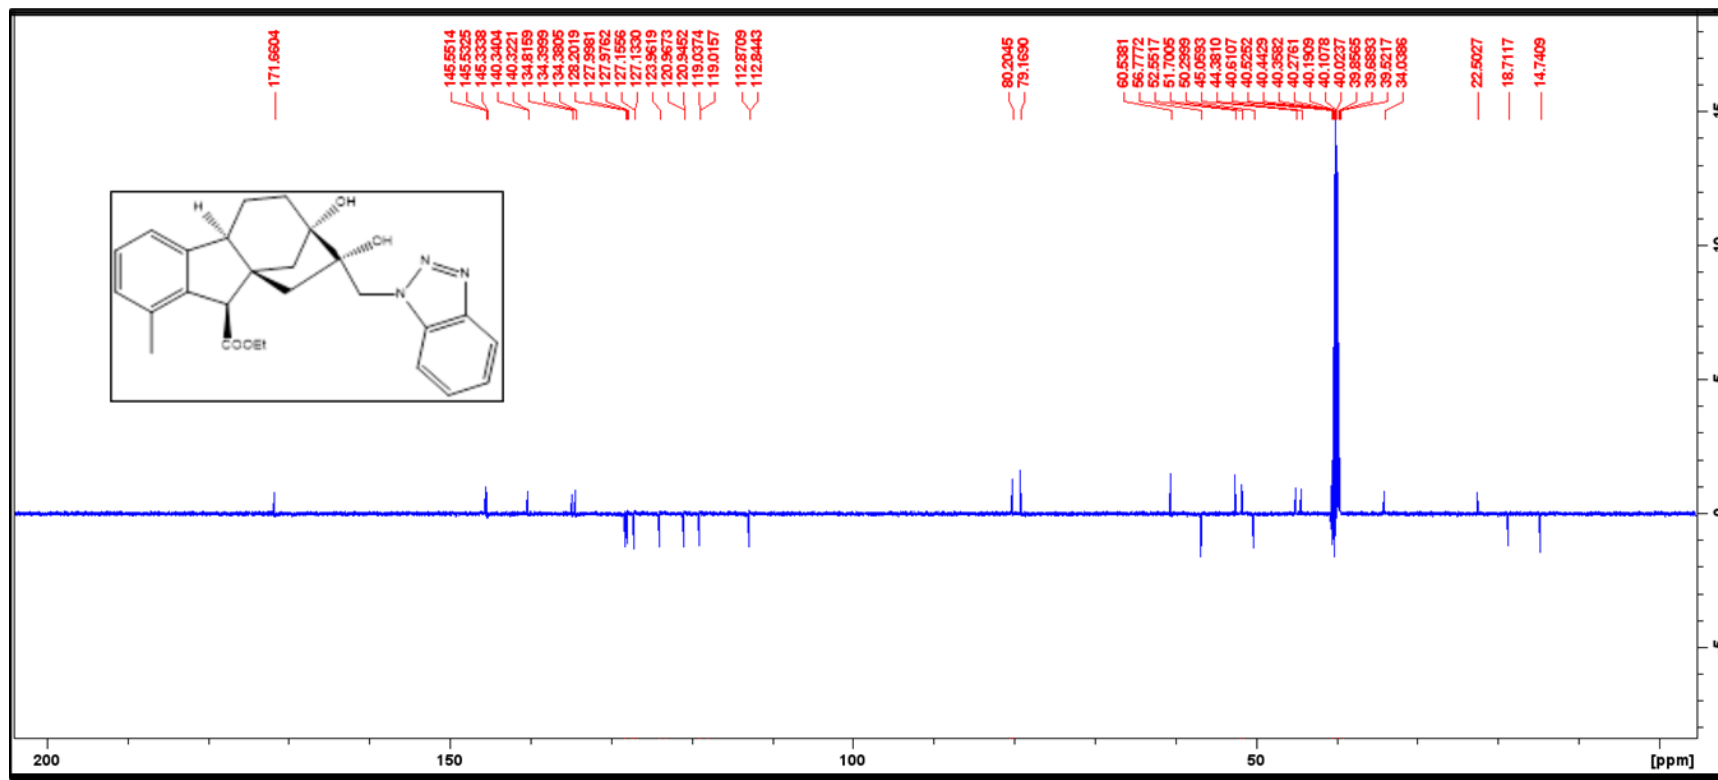



Figure S 68: <sup>1</sup>H-NMR of compound 31

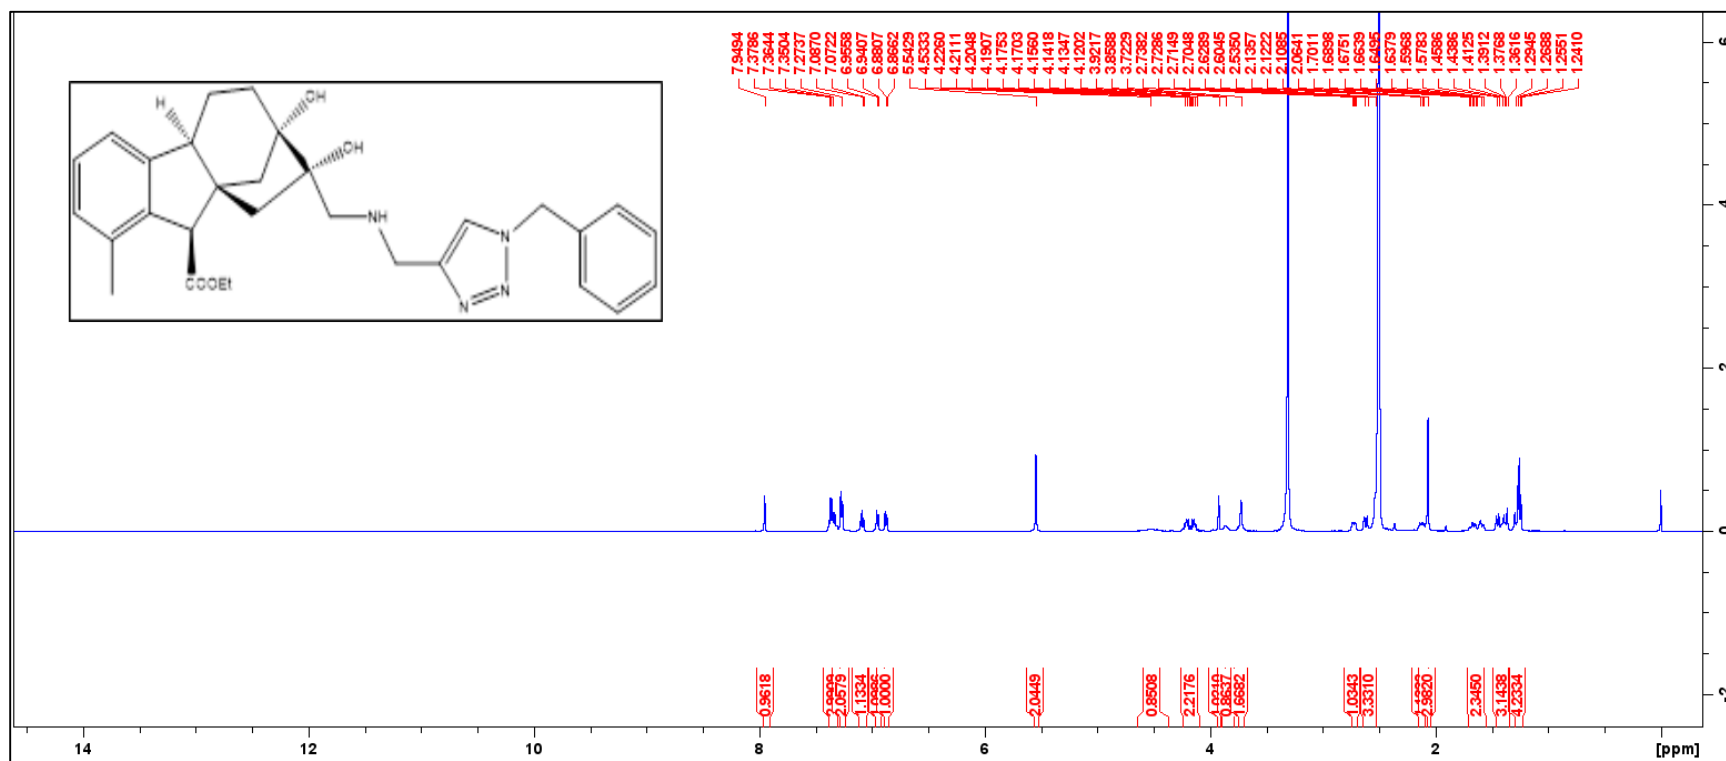

Figure S 69:  $^{13}\text{C}$ -NMR (JMOD) of compound 31

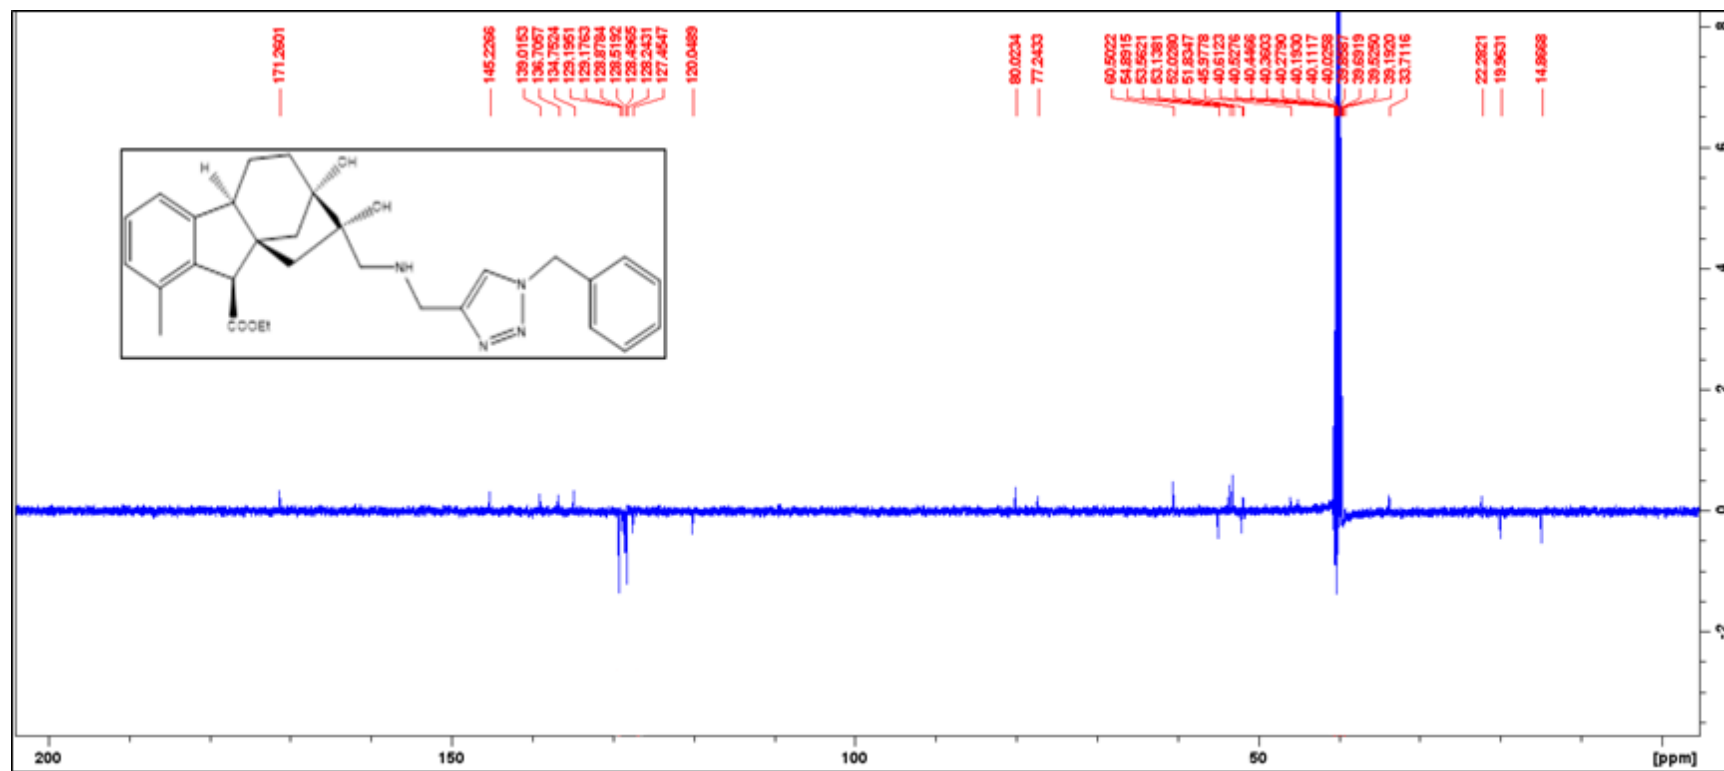

Figure S 70: HSQC of compound 31

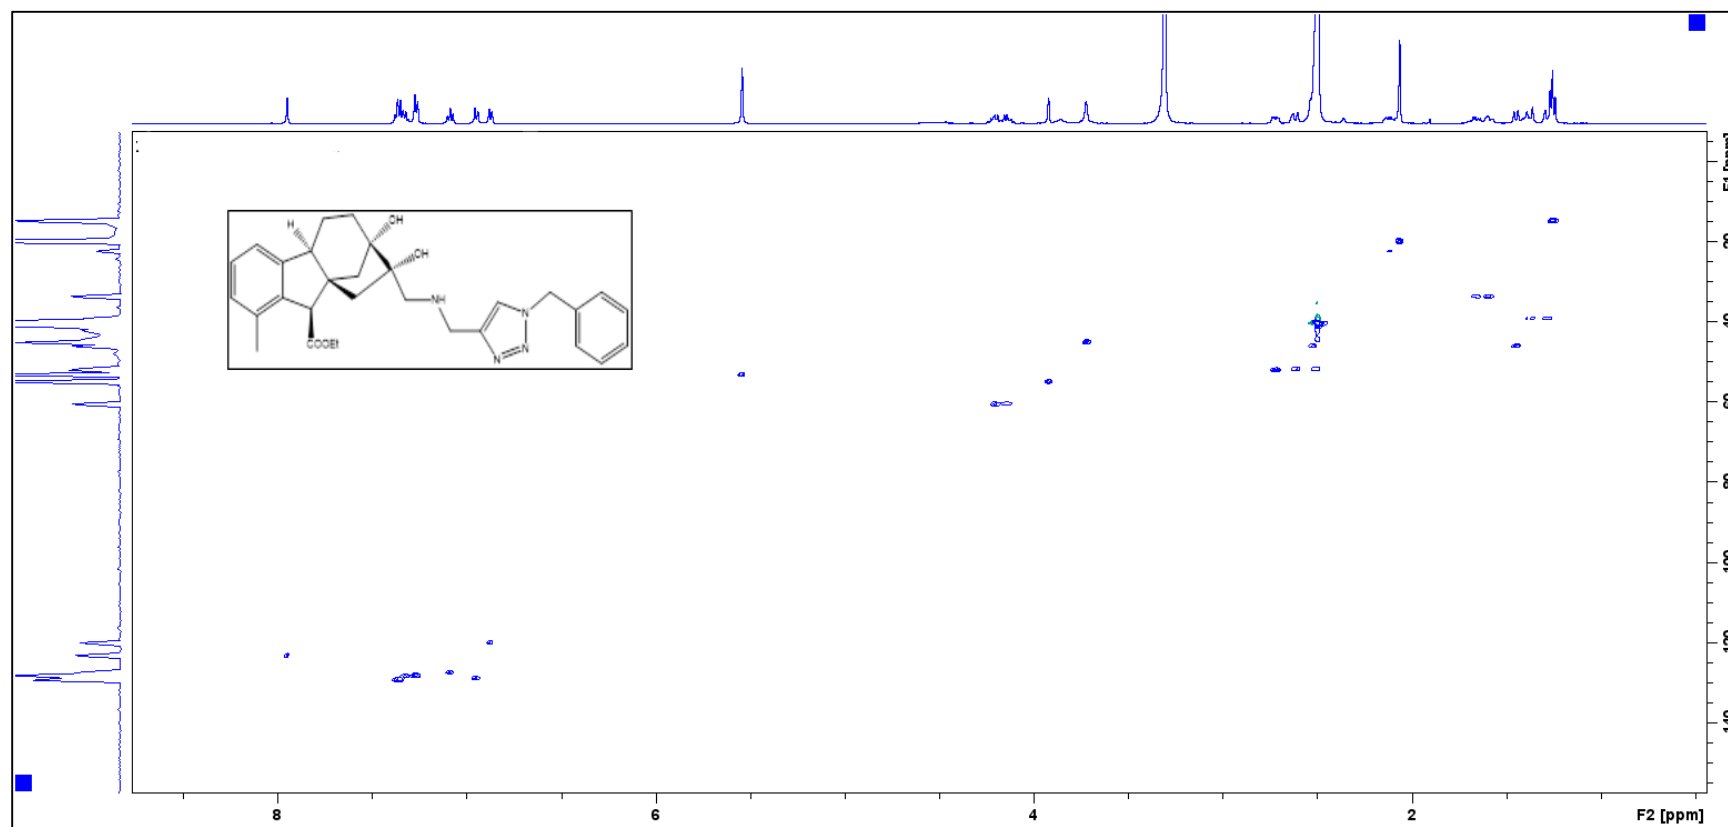

Figure S 71: HMBC of compound 31

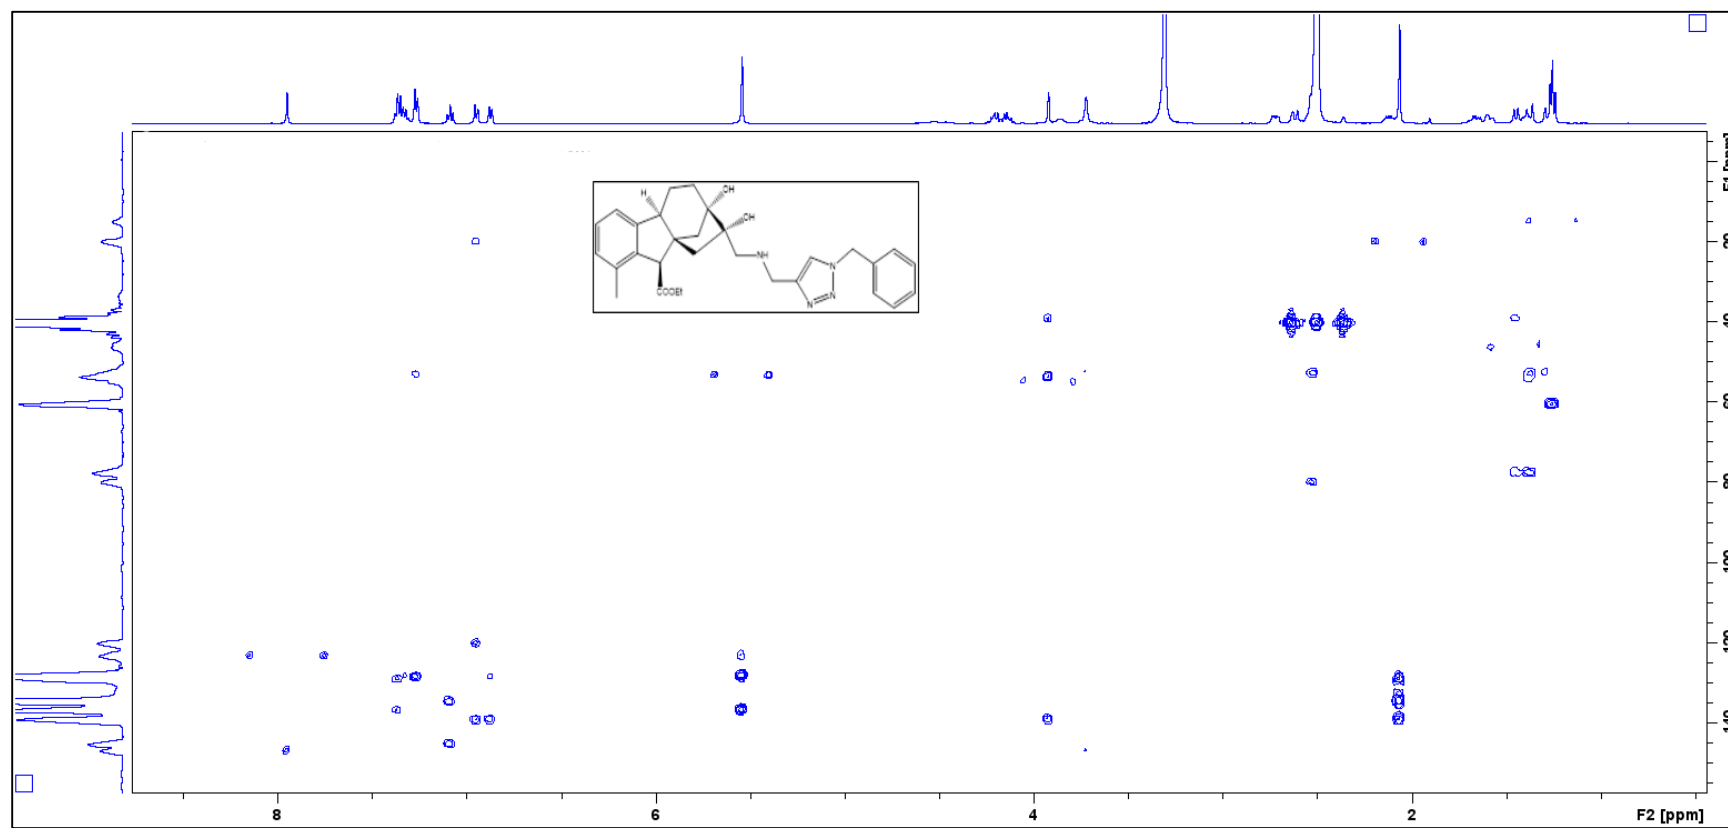

Figure S 72:  $^1\text{H}$ -NMR of Azido diol derivative

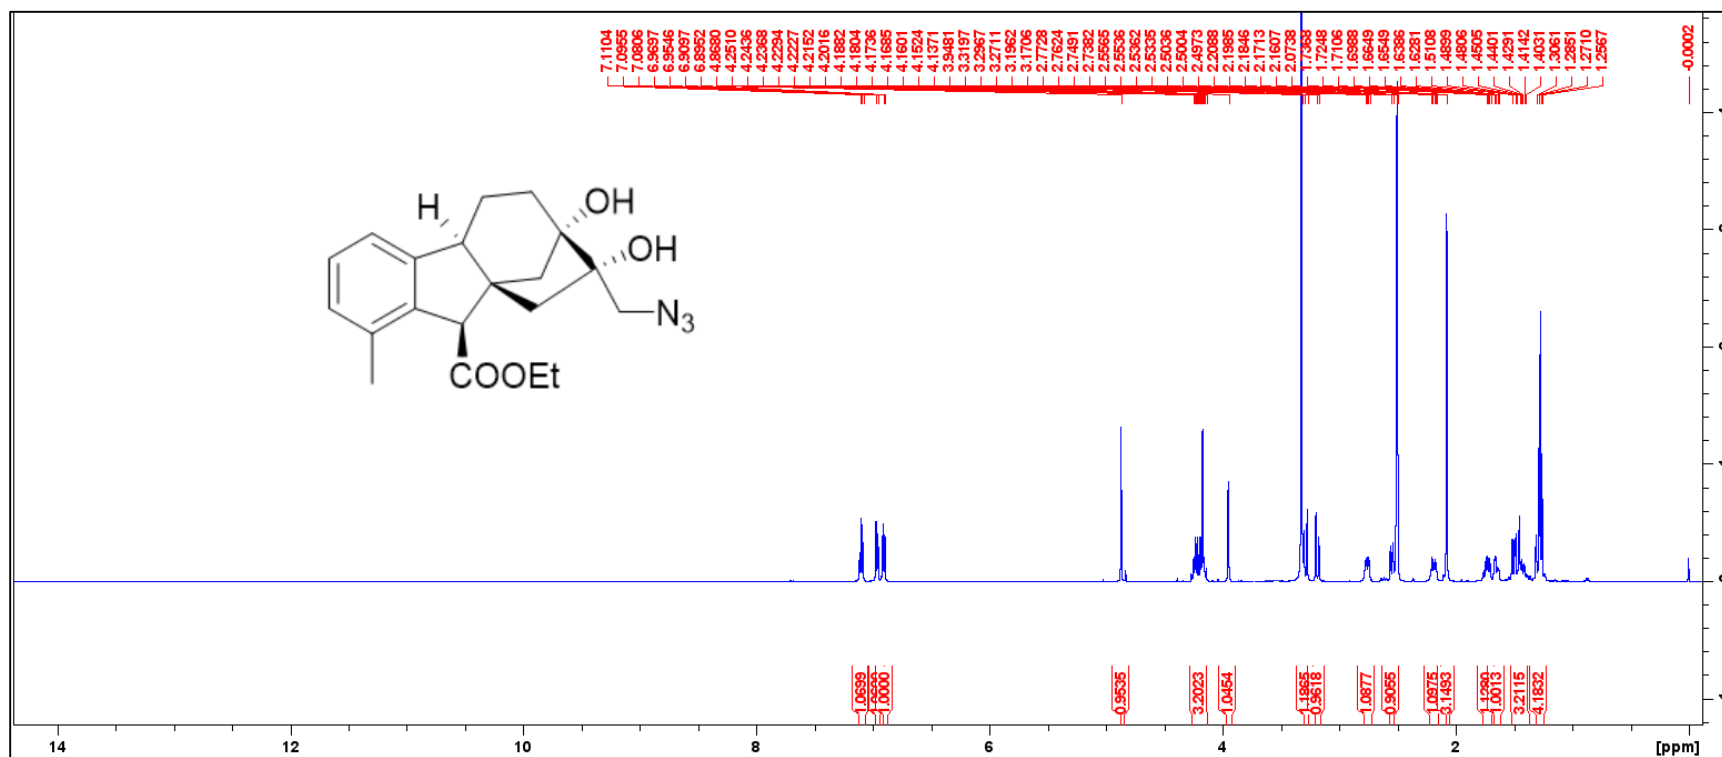

Figure S 73:  $^{13}\text{C}$ -NMR (JMOD) of Azido diol derivative

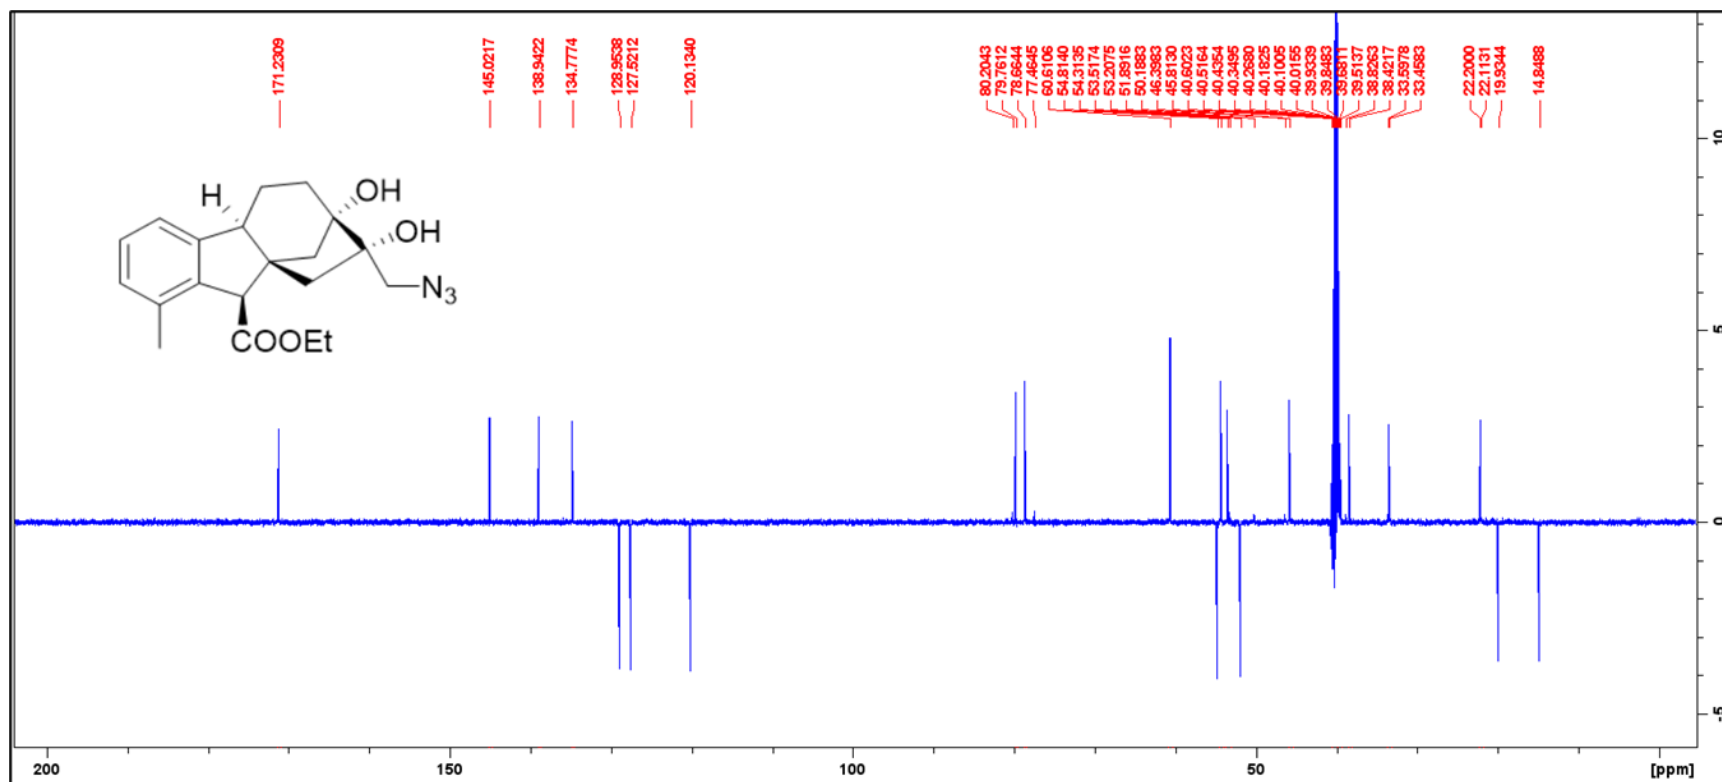

Figure S 74: <sup>1</sup>H-NMR of compound 32

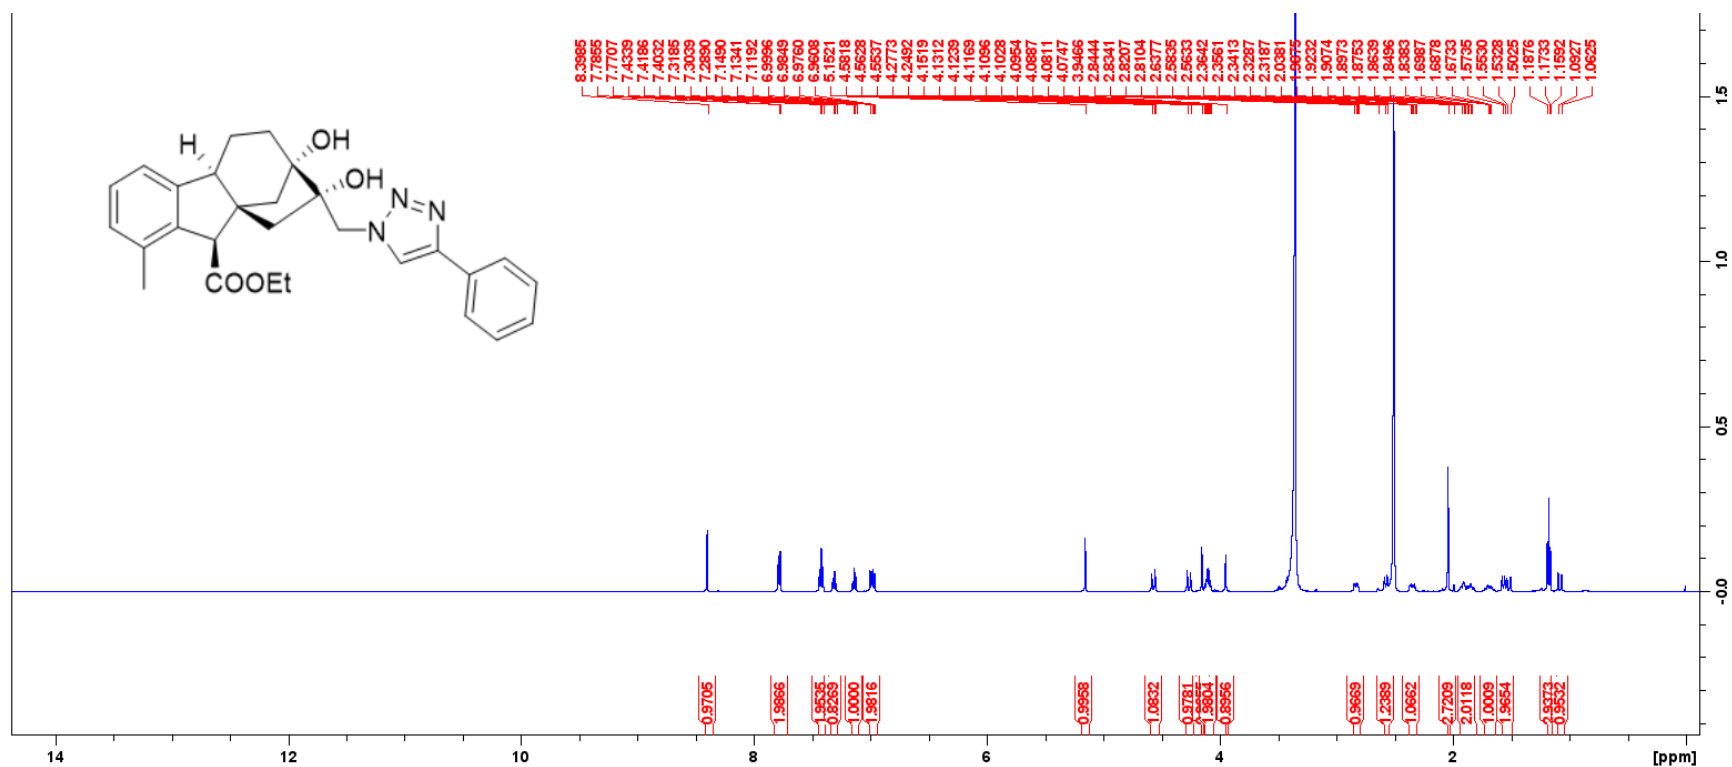

Figure S 75:  $^{13}\text{C}$ -NMR (JMOD) of compound 32

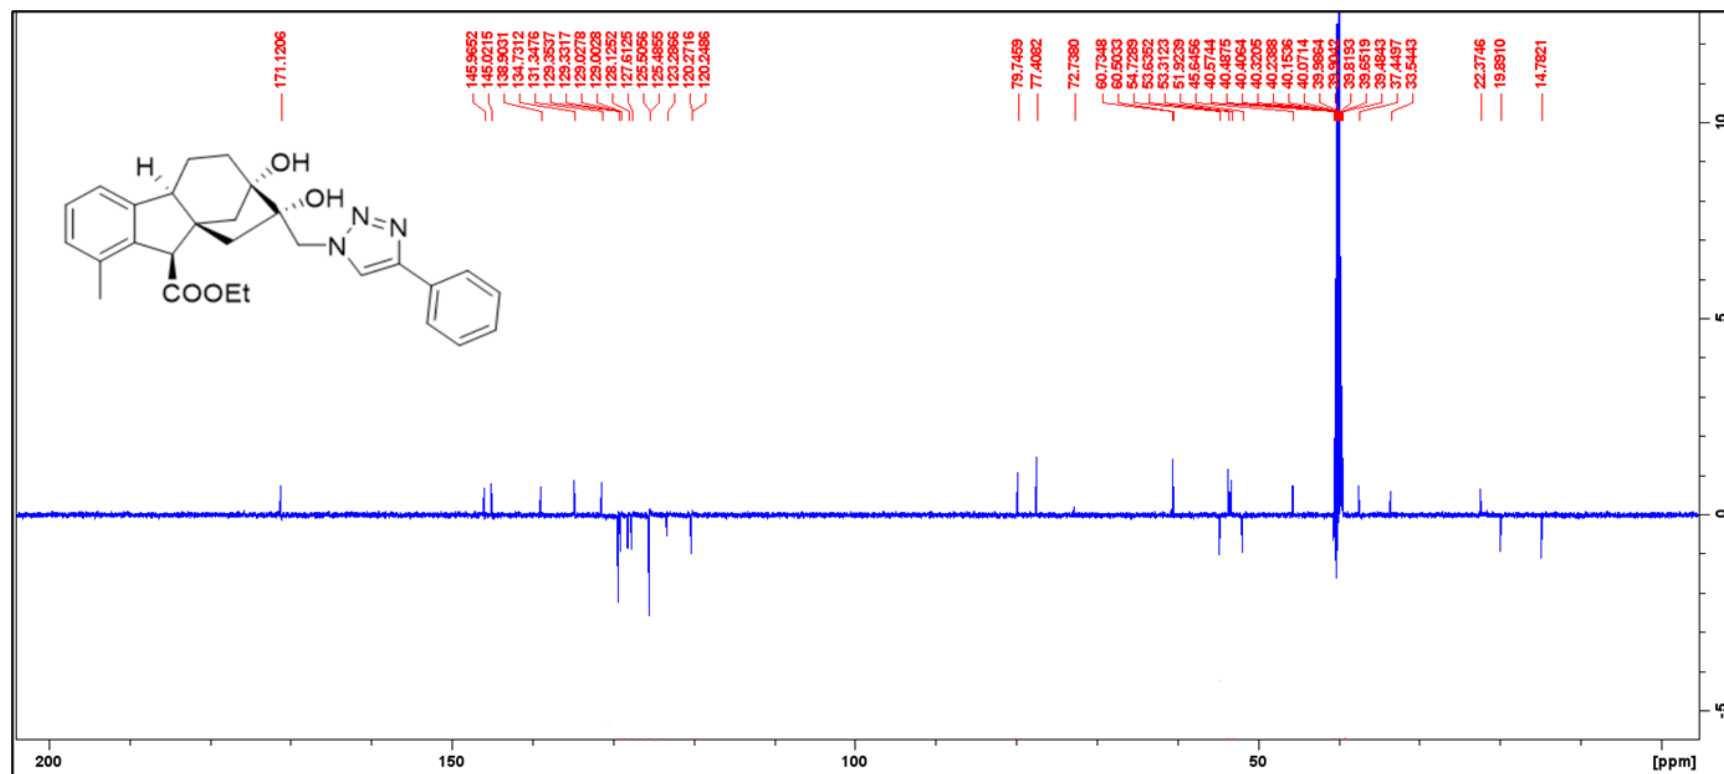



Figure S 76: <sup>1</sup>H-NMR of compound 33

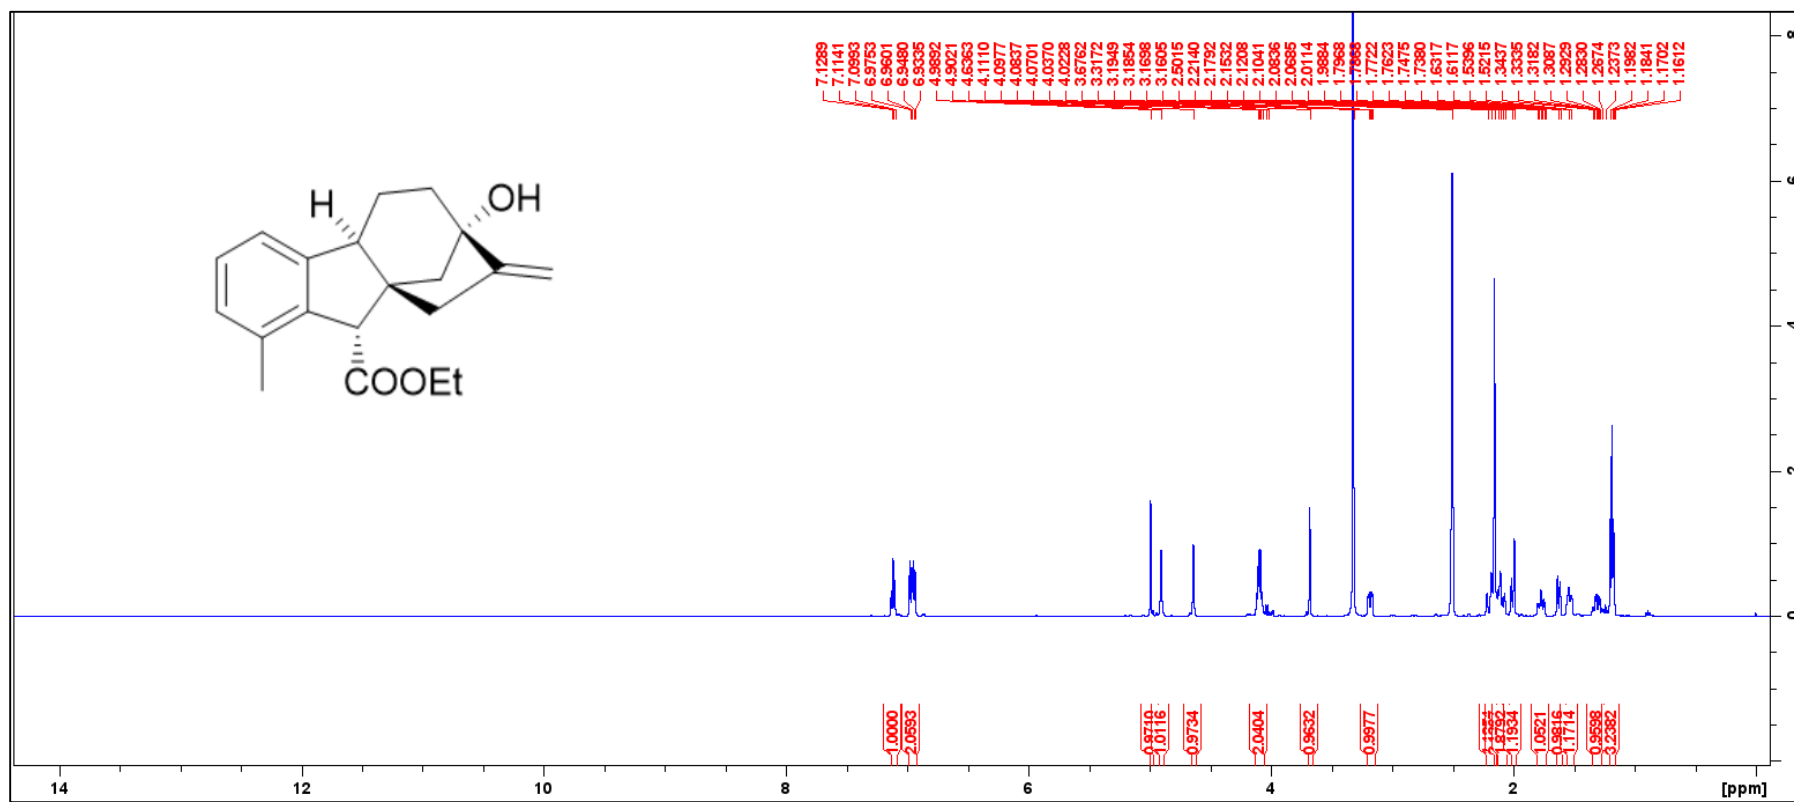

Figure S 77:  $^{13}\text{C}$ -NMR (JMOD) of compound 33

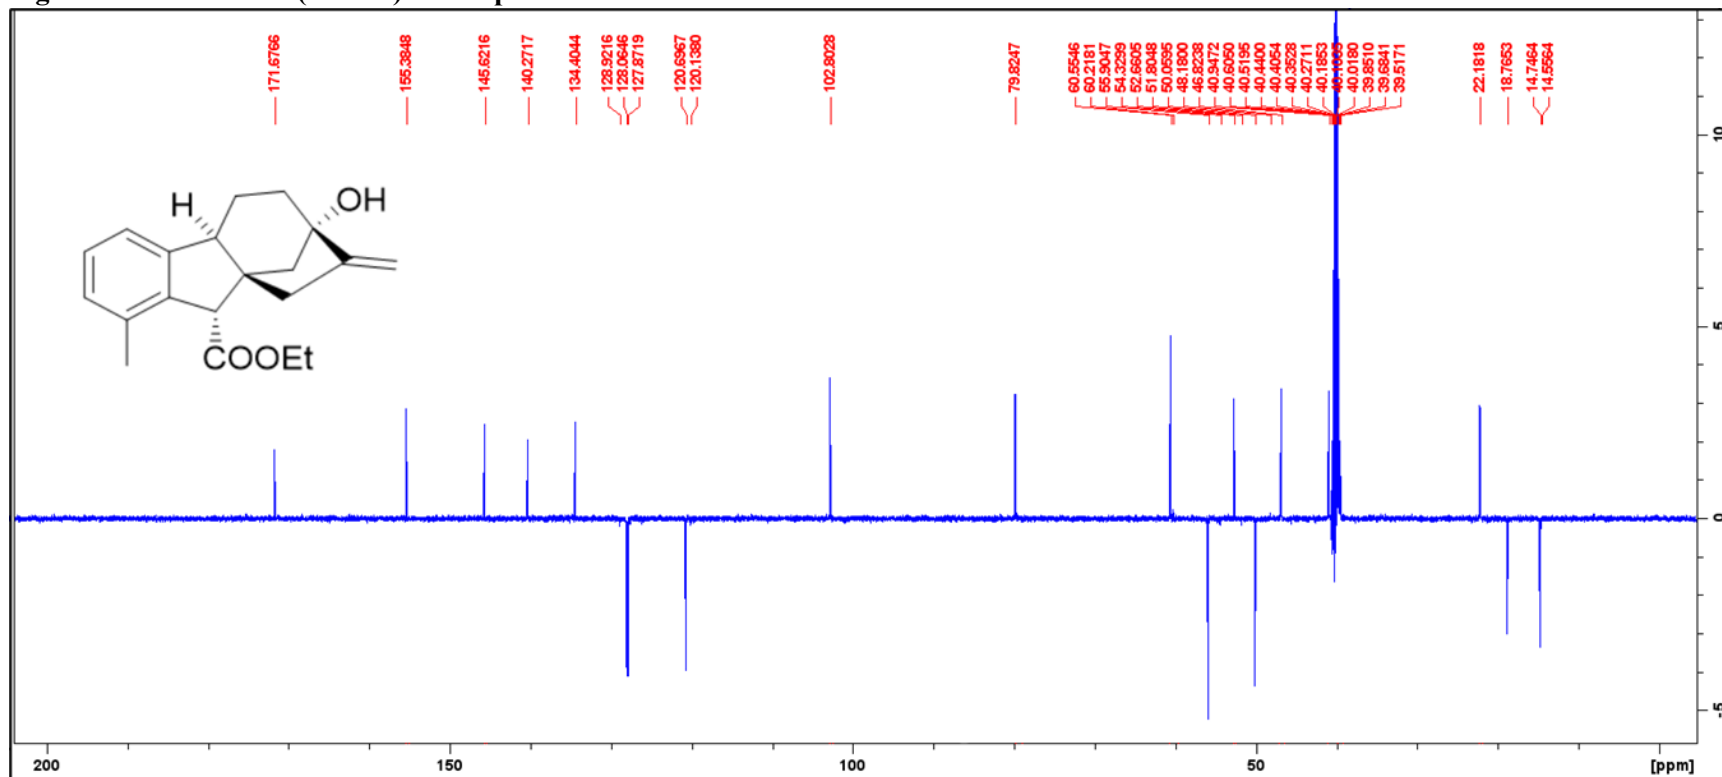

Figure S 78: COSY of compound 33

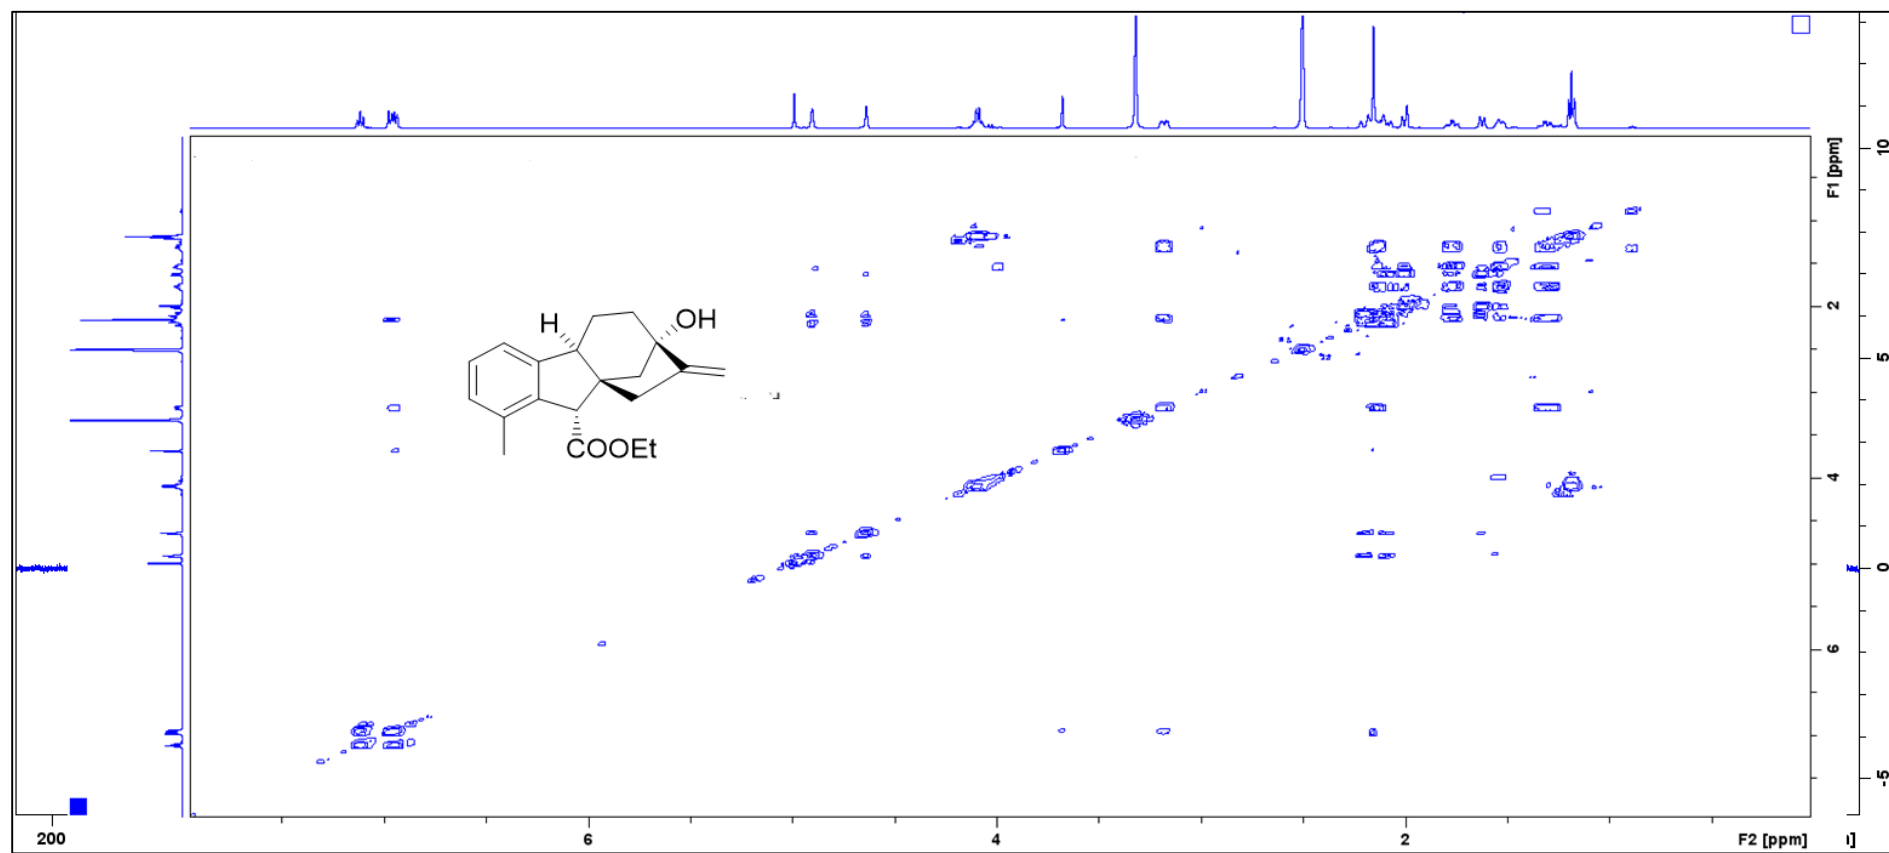

Figure S 79: NOESY of compound 33

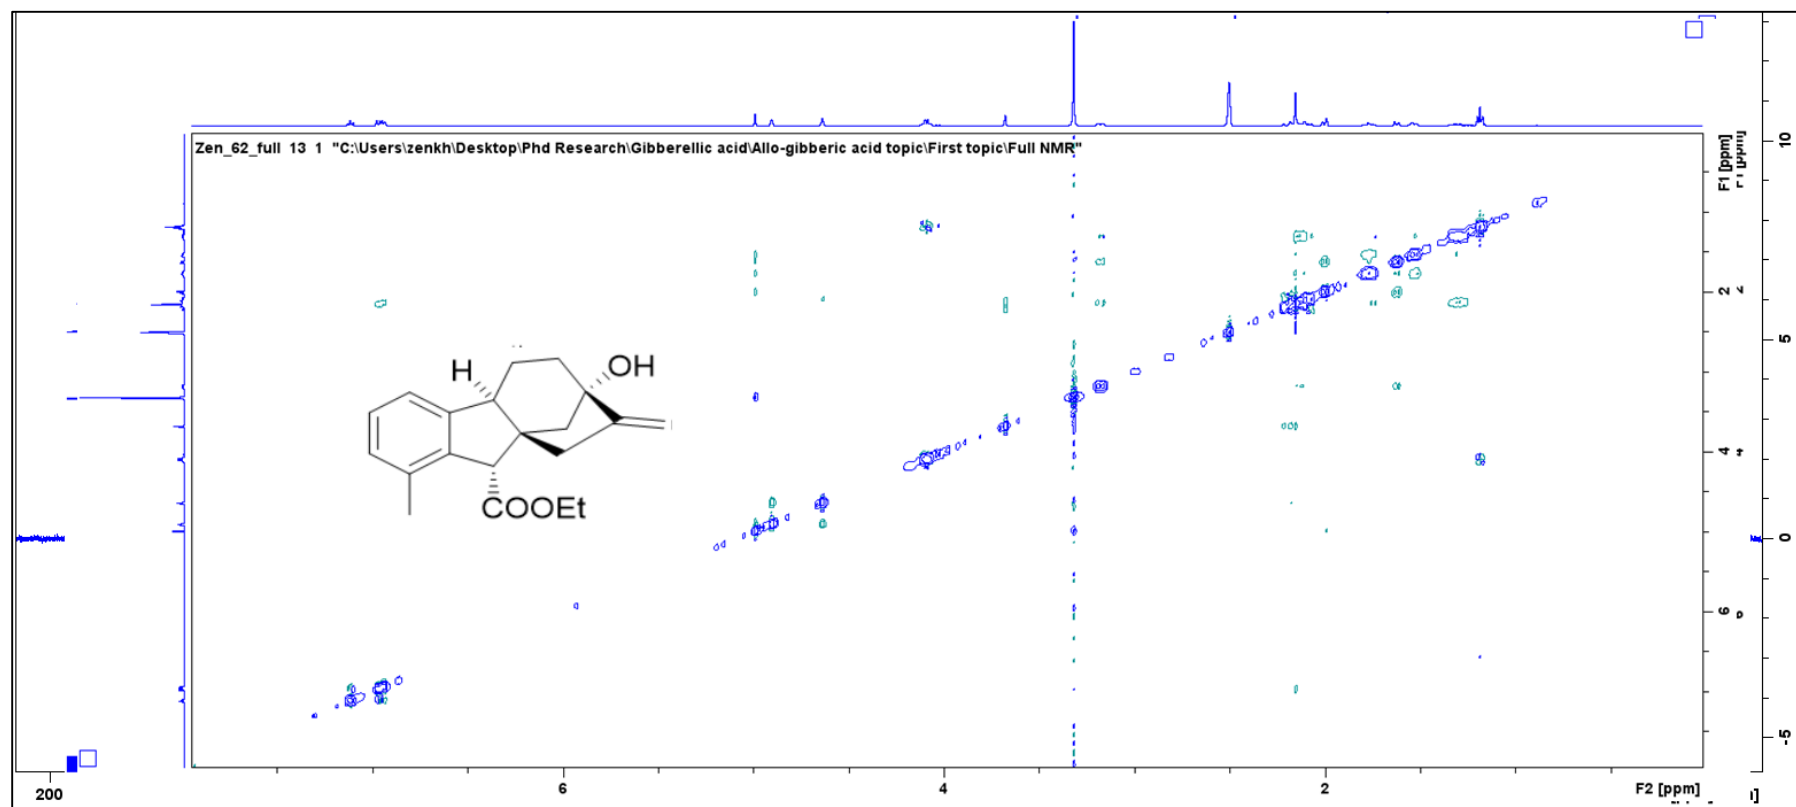

Figure S 80: HSQC of compound 33

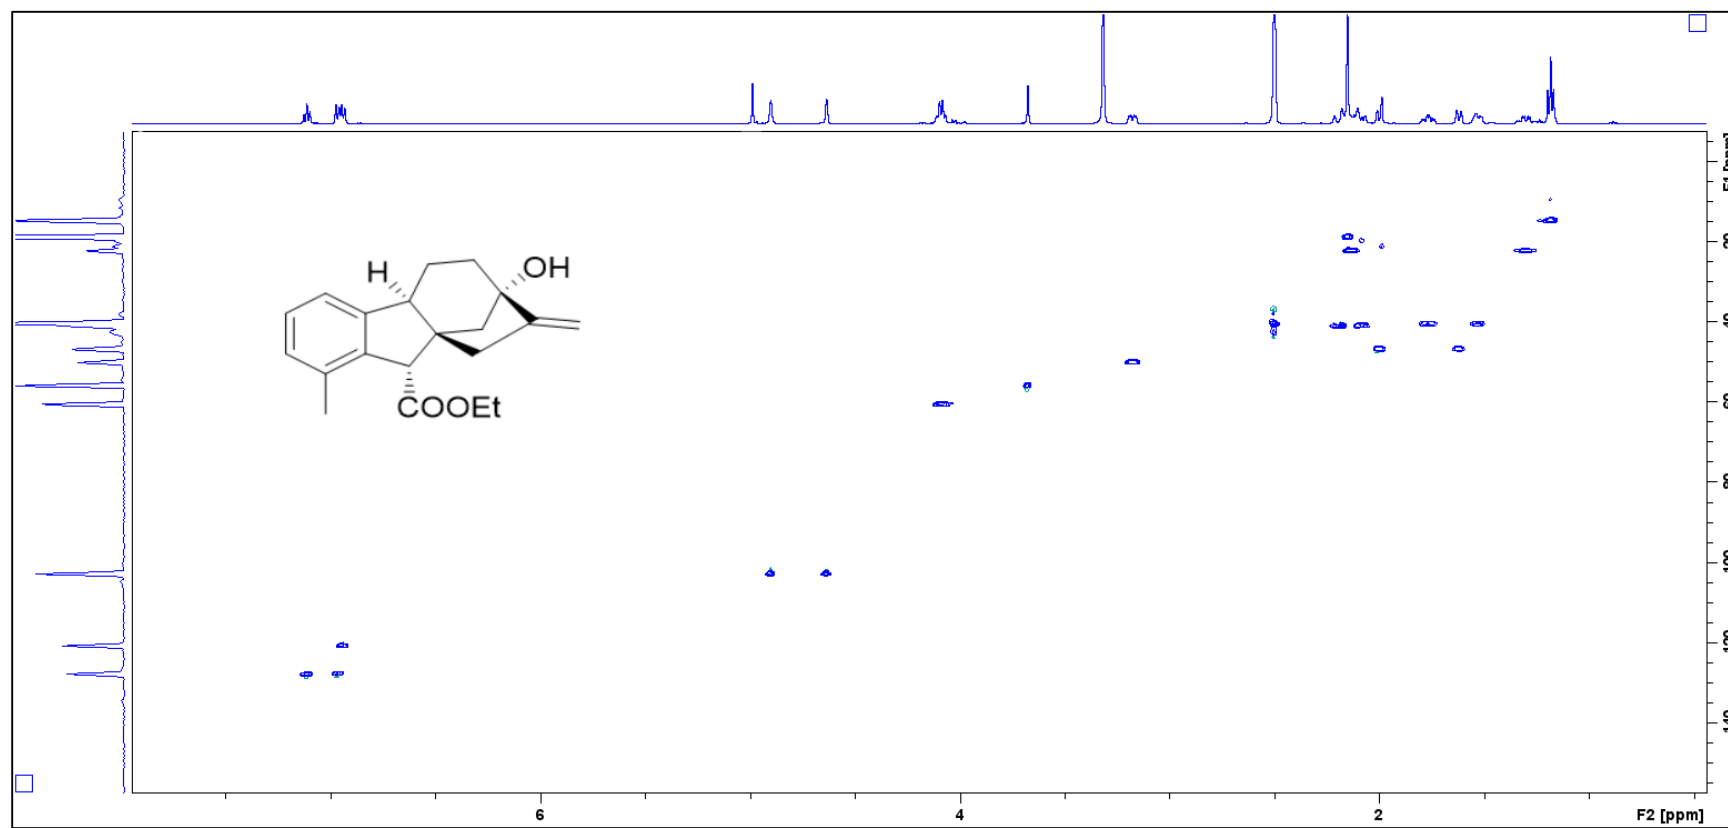

Figure S 81: HMBC of compound 33

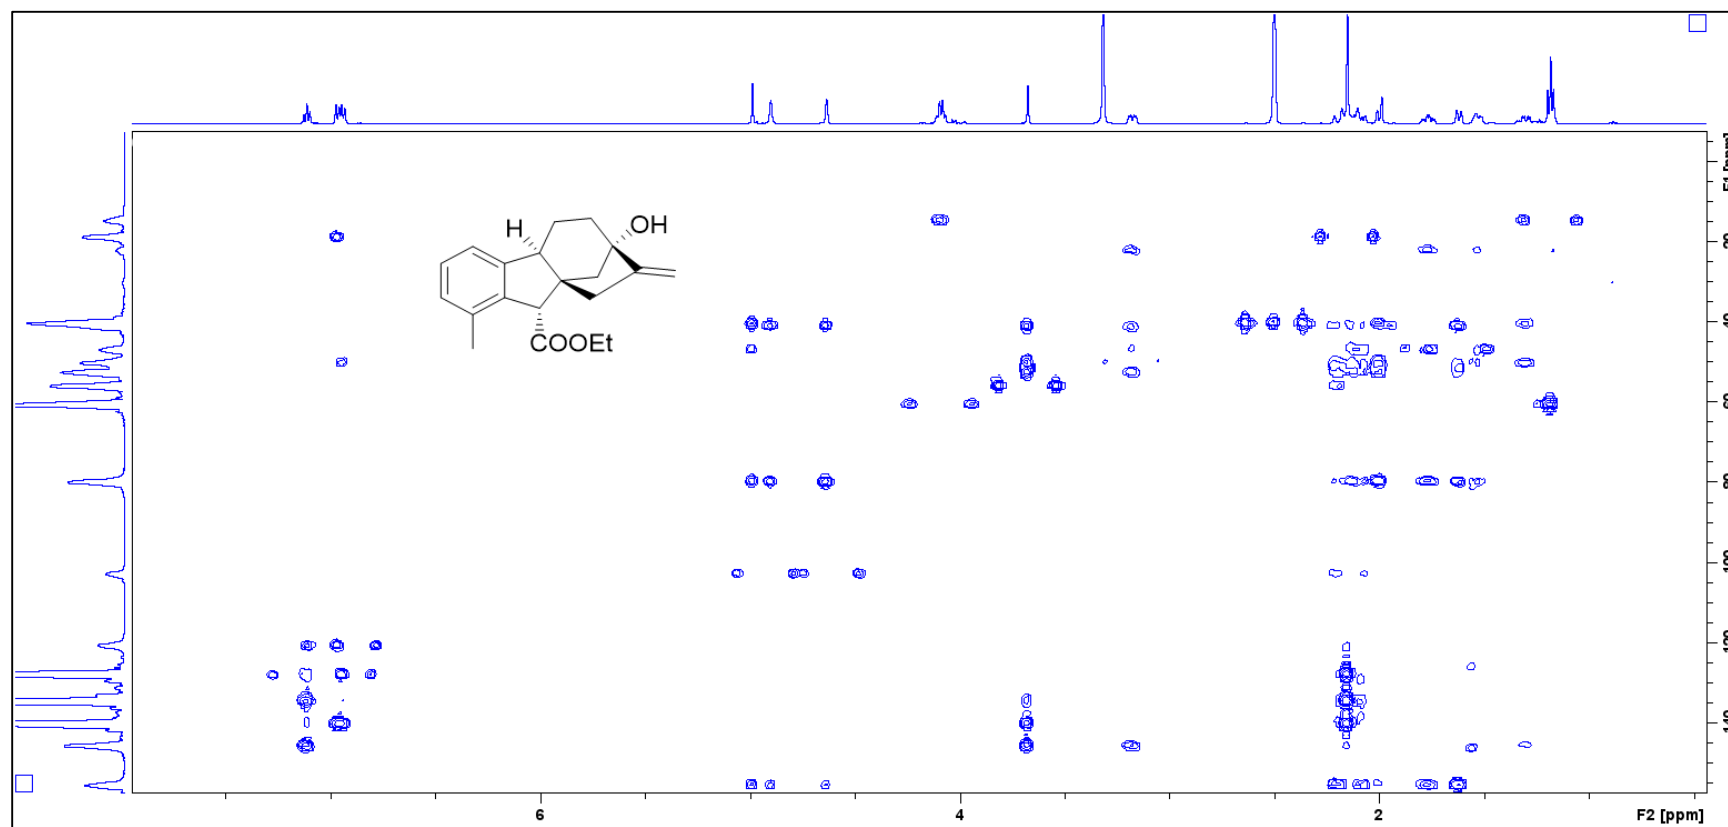

Figure S 82:  $^1\text{H}$ -NMR of compound 34

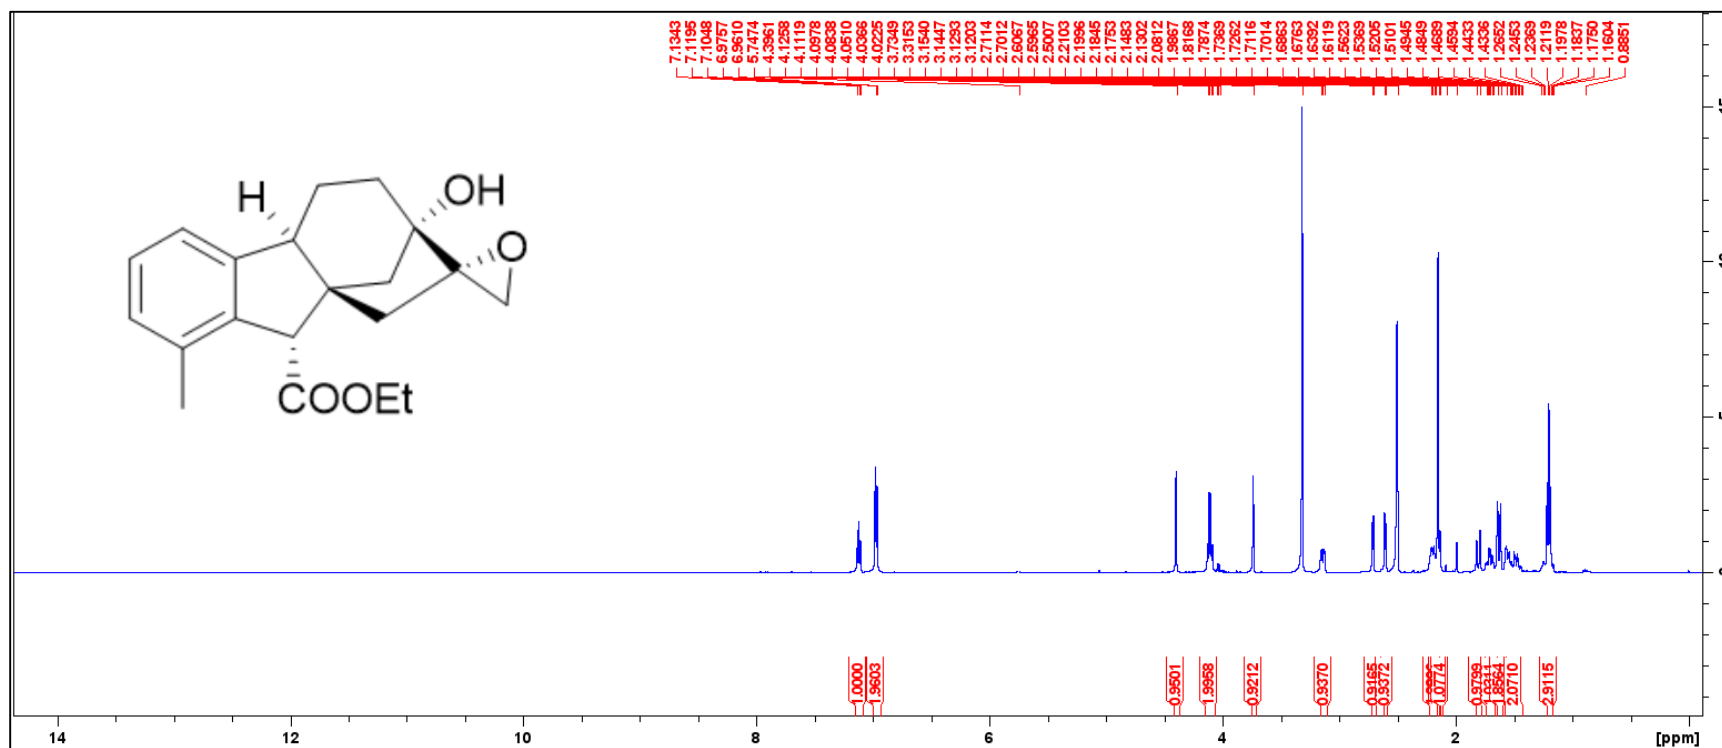

Figure S 83:  $^{13}\text{C}$ -NMR (JMOD) of compound 34

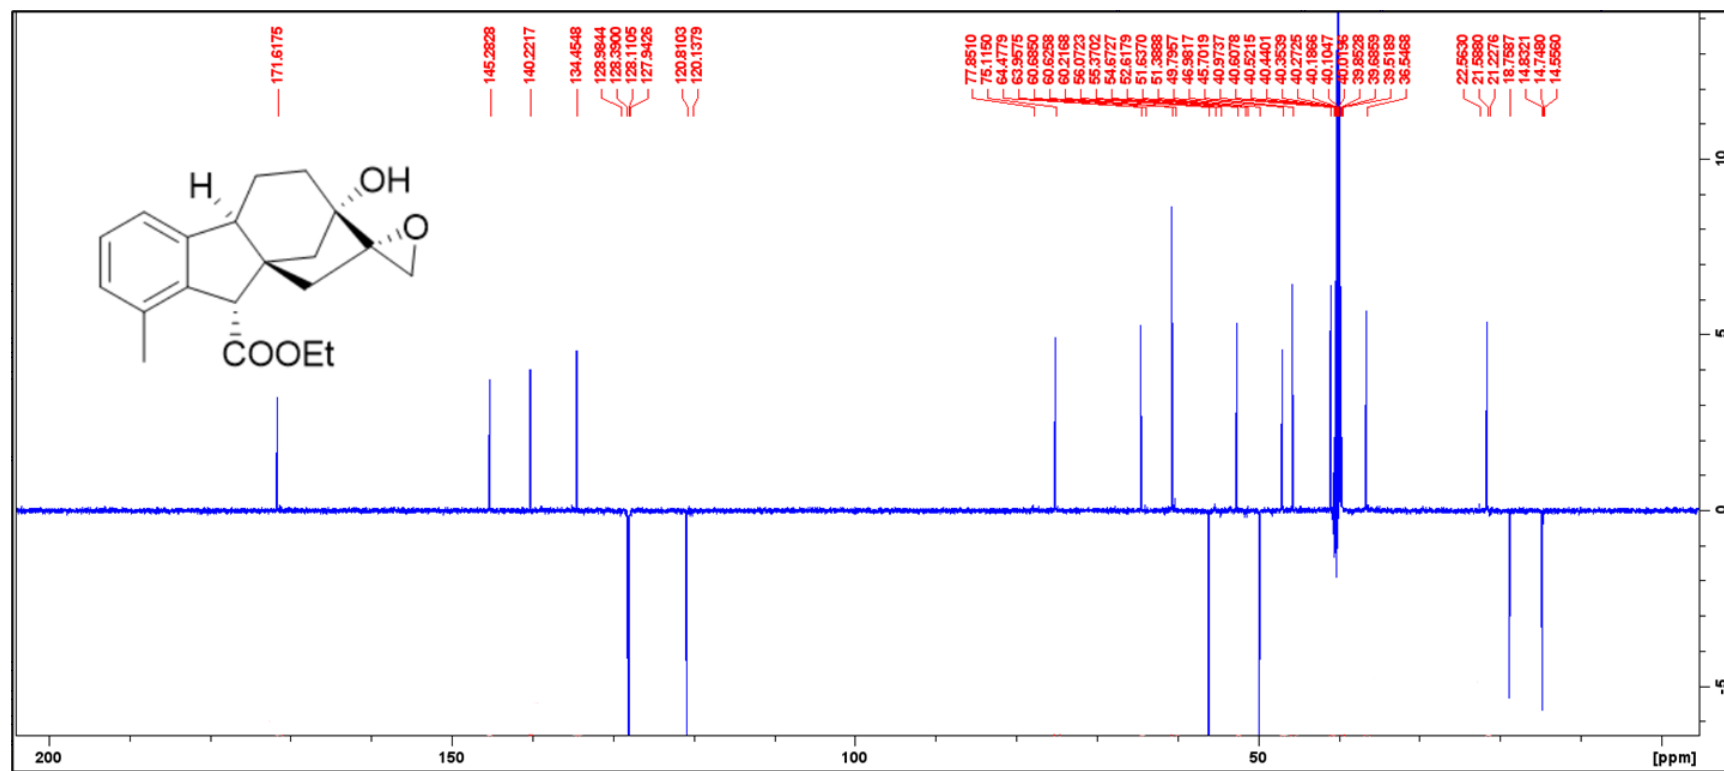



Figure S 84:  $^1\text{H}$ -NMR of compound 35

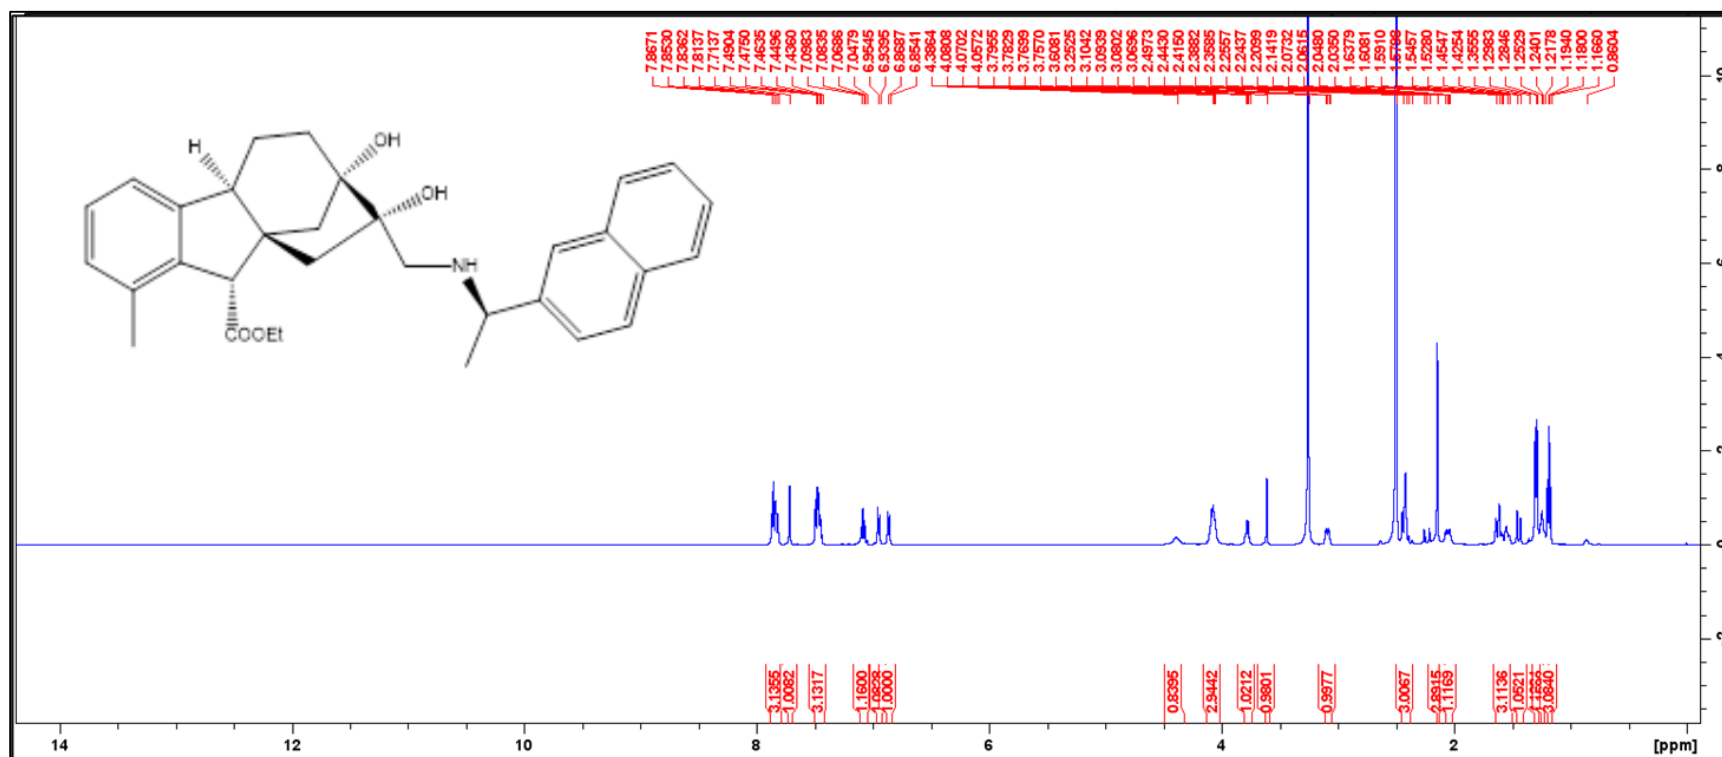

Figure S 85:  $^{13}\text{C}$ -NMR (JMOD) of compound 35

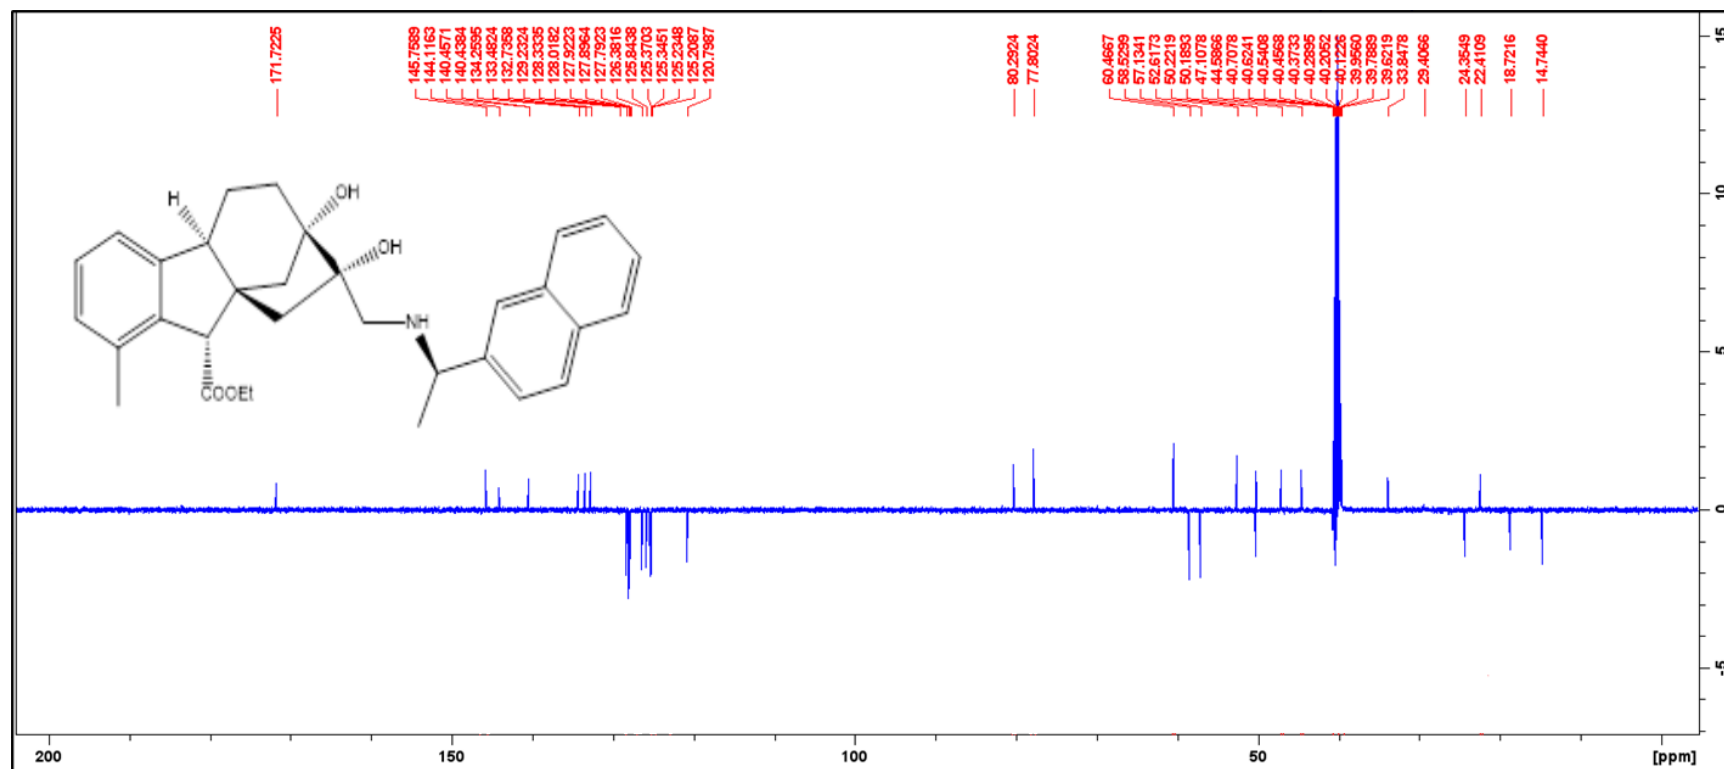

Figure S 86: <sup>1</sup>H-NMR of compound 36

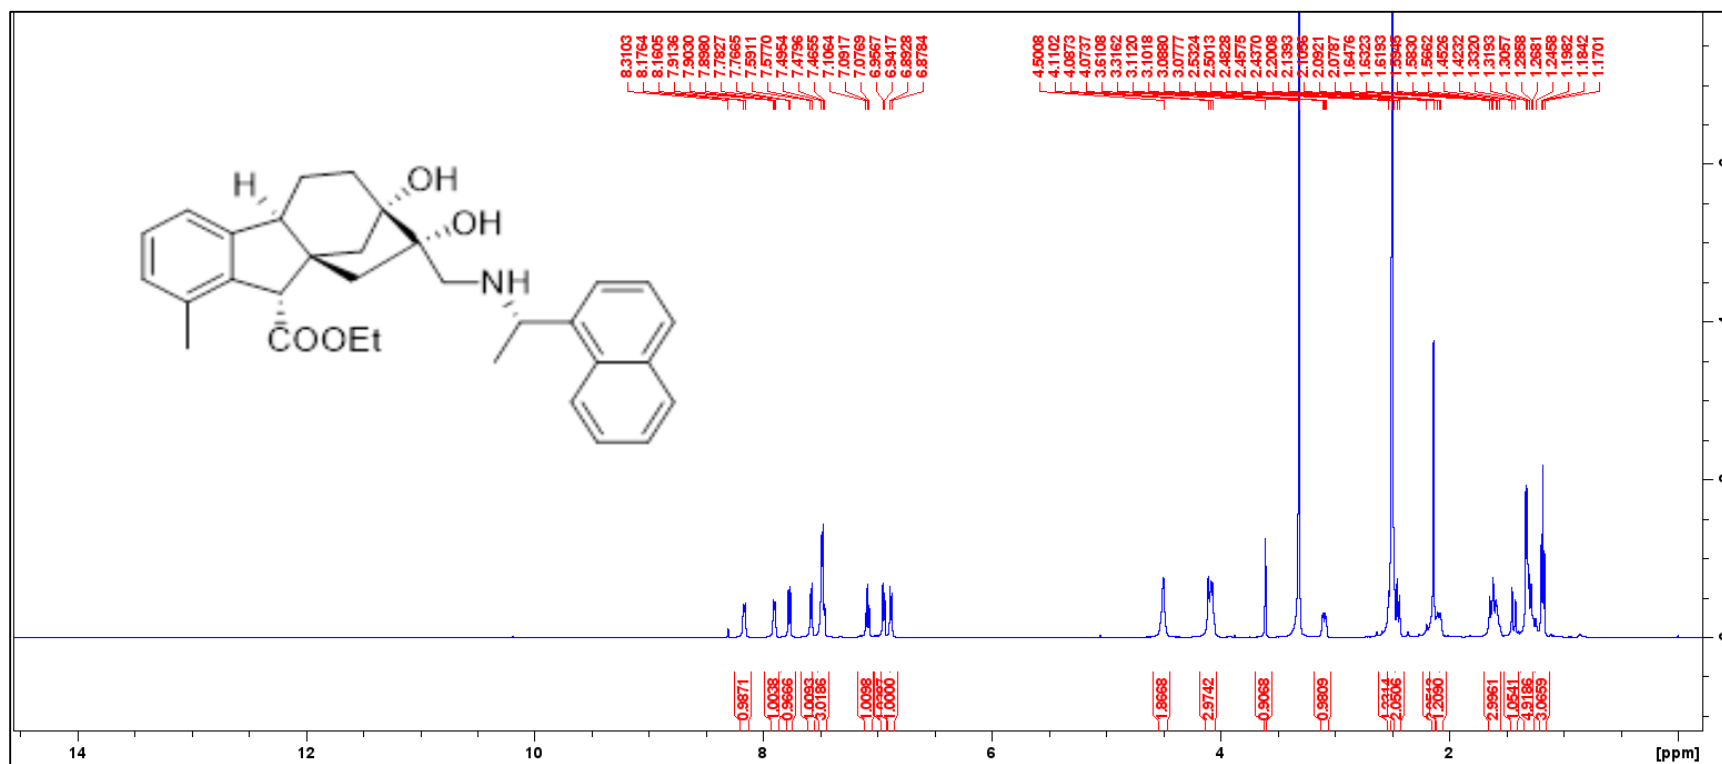

Figure S 87:  $^{13}\text{C}$ -NMR (JMOD) of compound 36

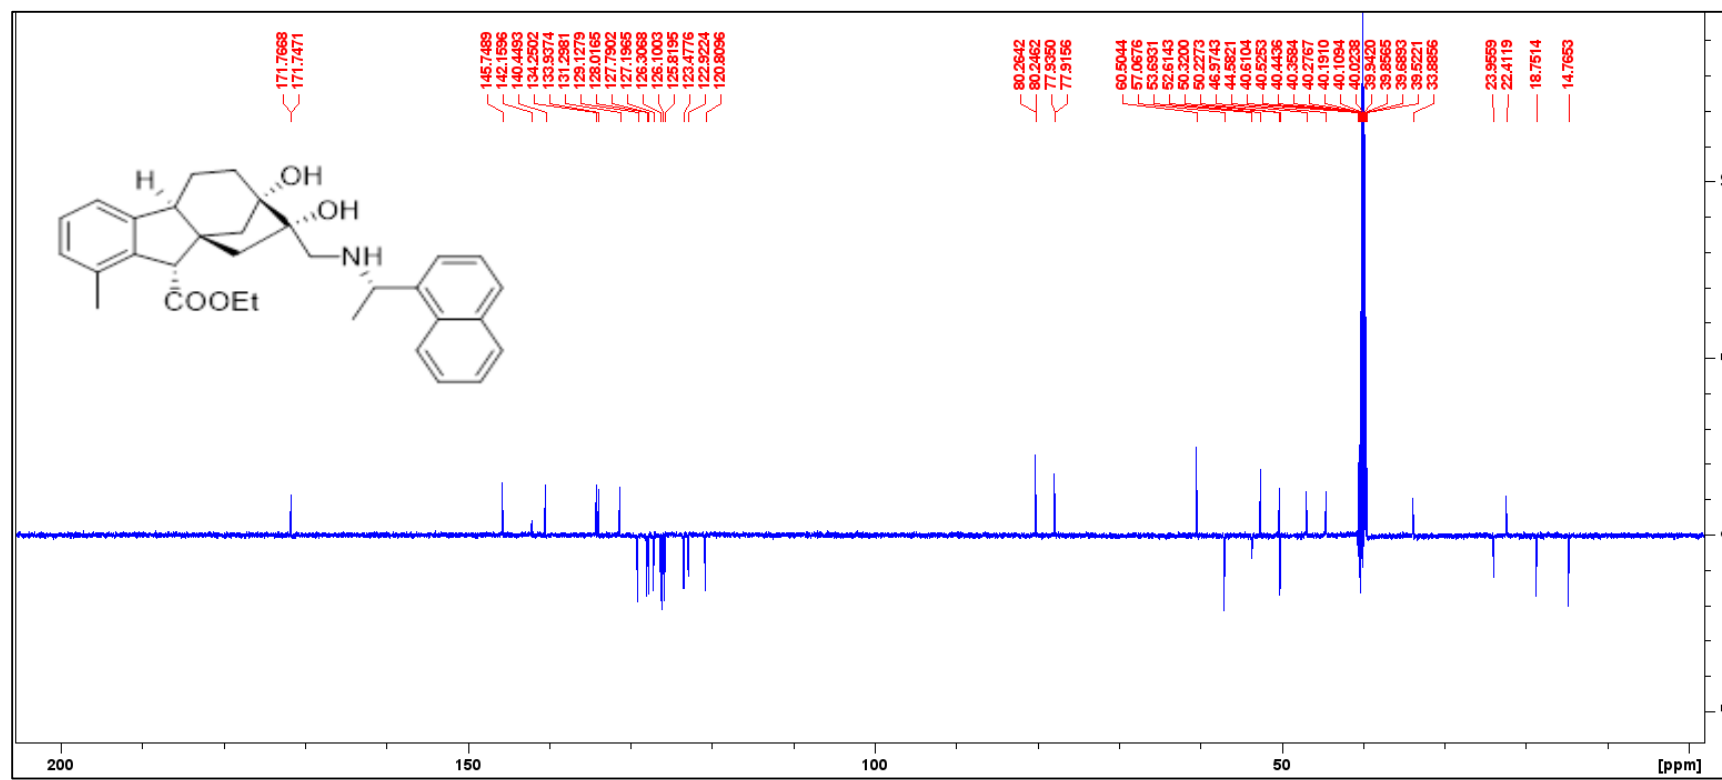

Figure S 88: <sup>1</sup>H-NMR of compound 37

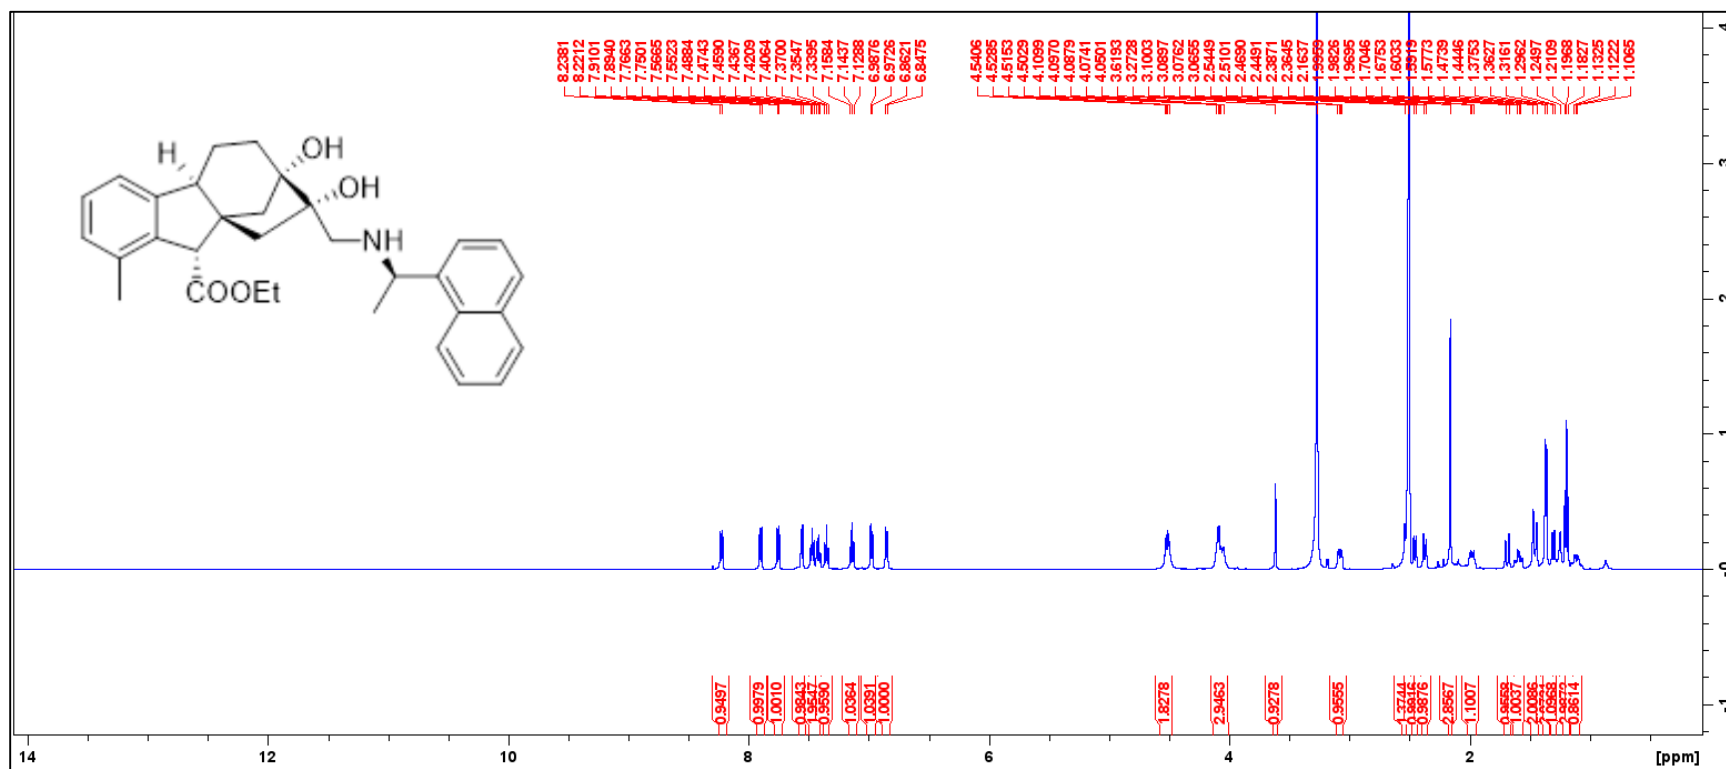

Figure S 89:  $^{13}\text{C}$ -NMR (JMOD) of compound 37

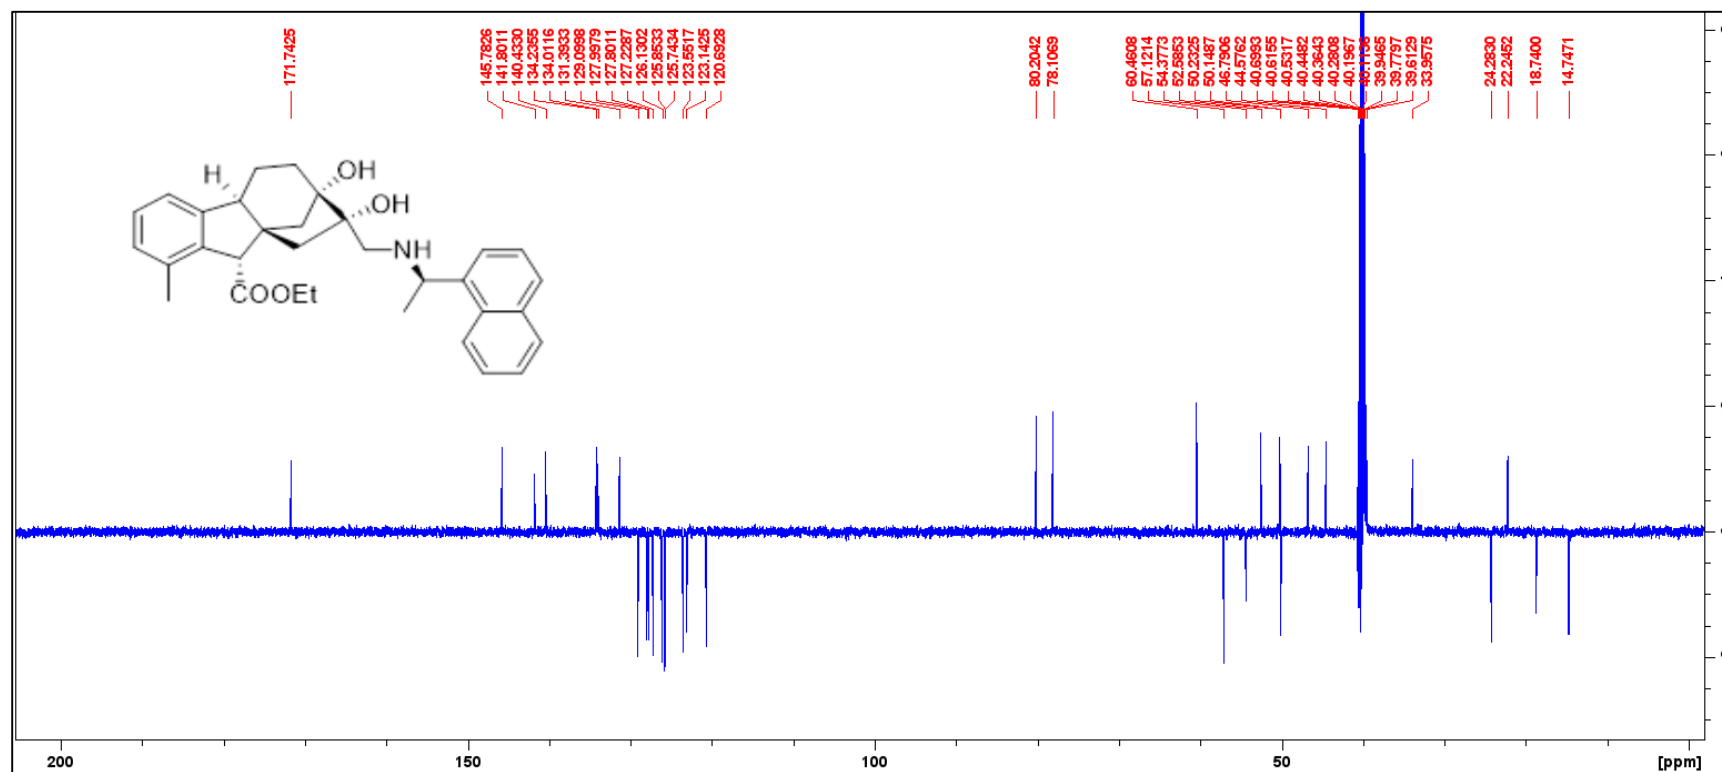

Figure S 90:  $^1\text{H}$ -NMR of compound 38

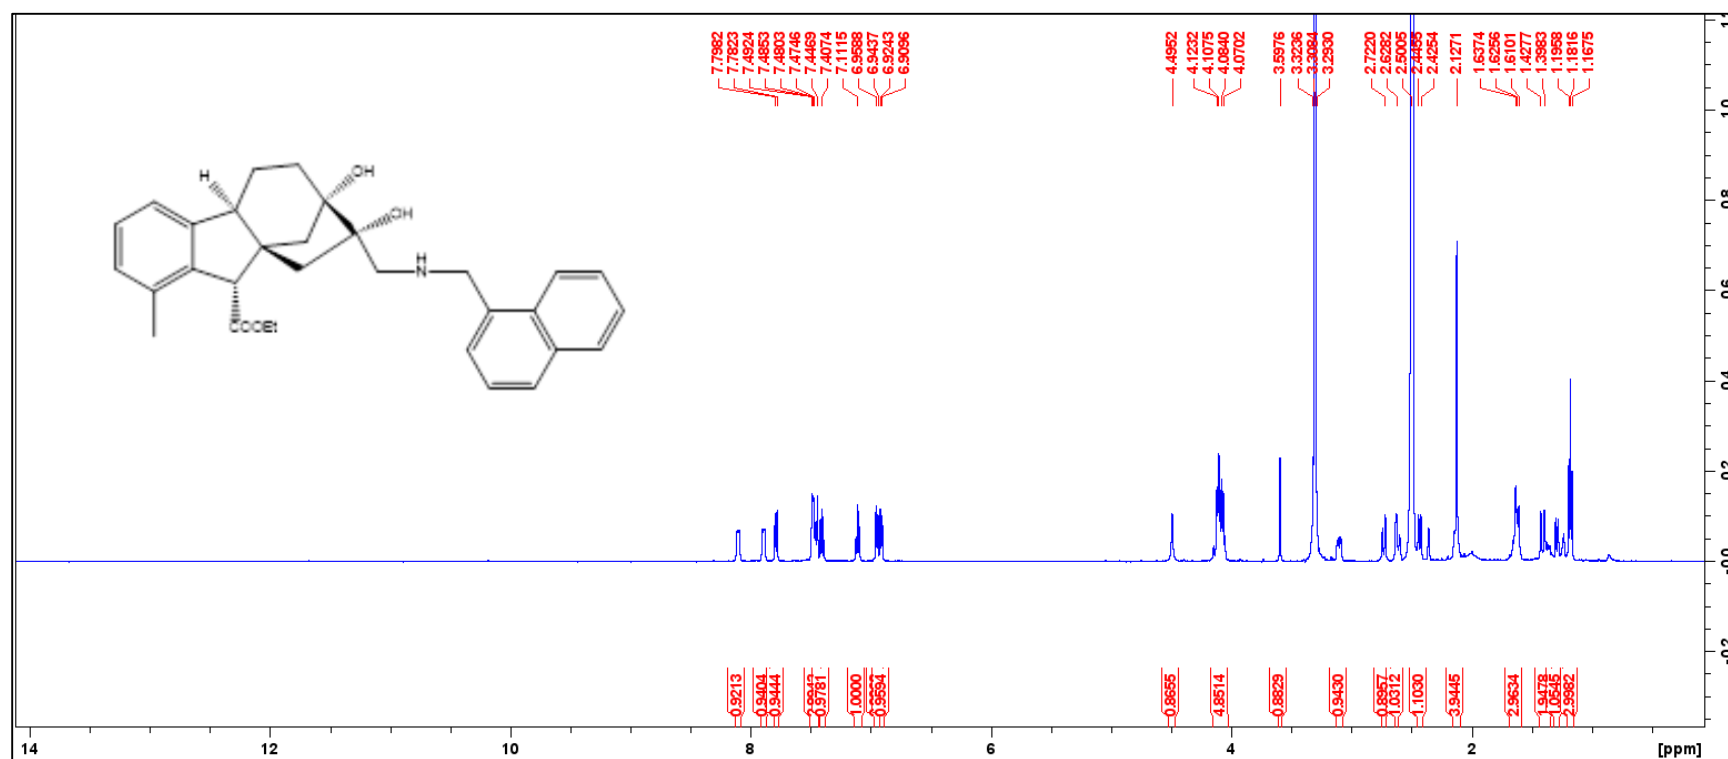

Figure S 91:  $^{13}\text{C}$ -NMR (JMOD) of compound 38

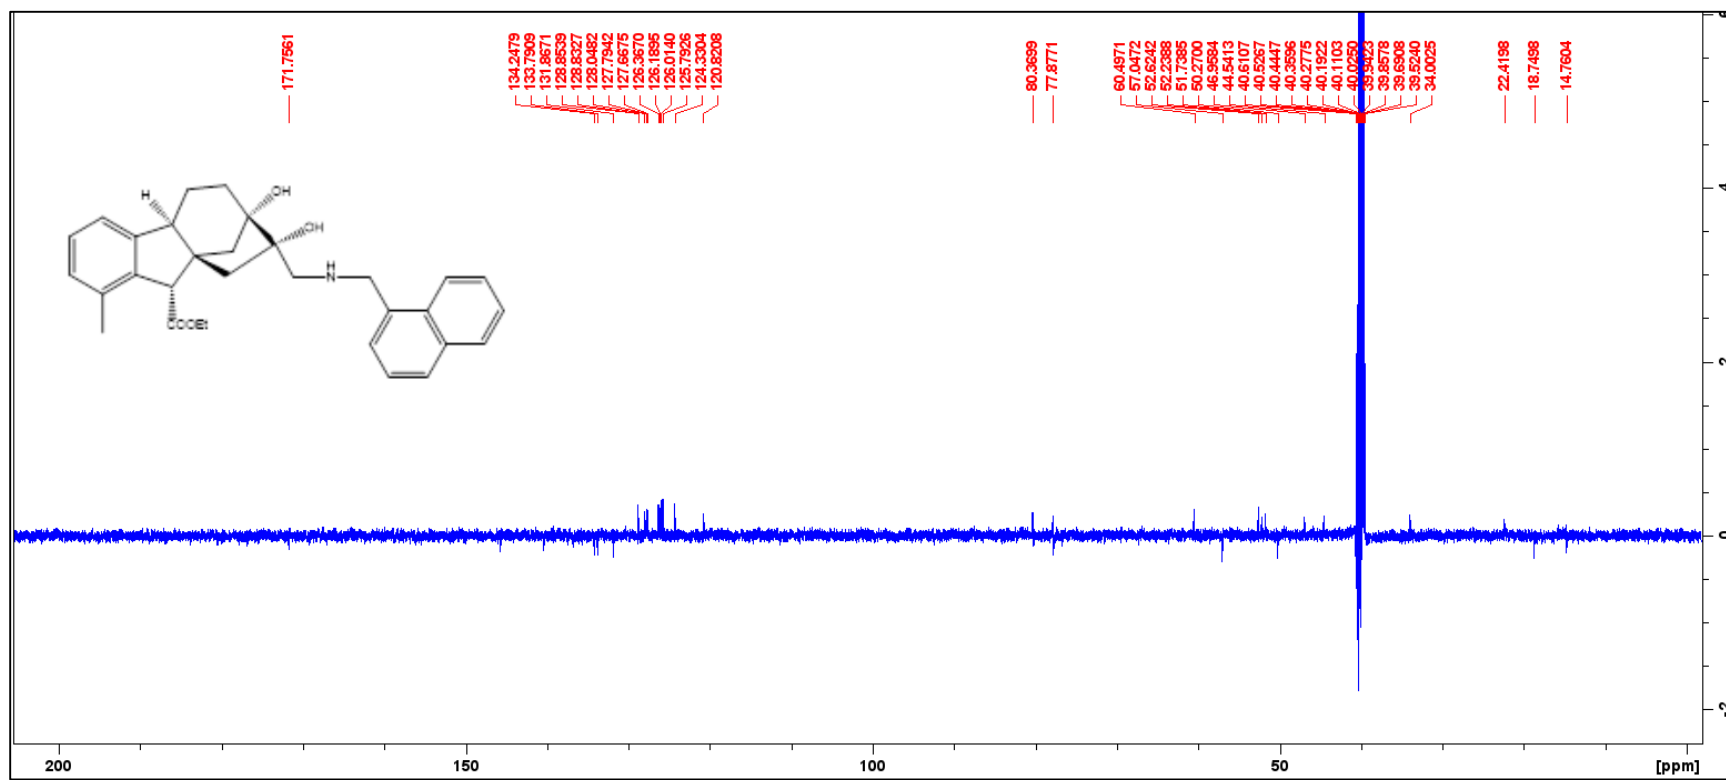



Figure S 92: NOESY of compound 38

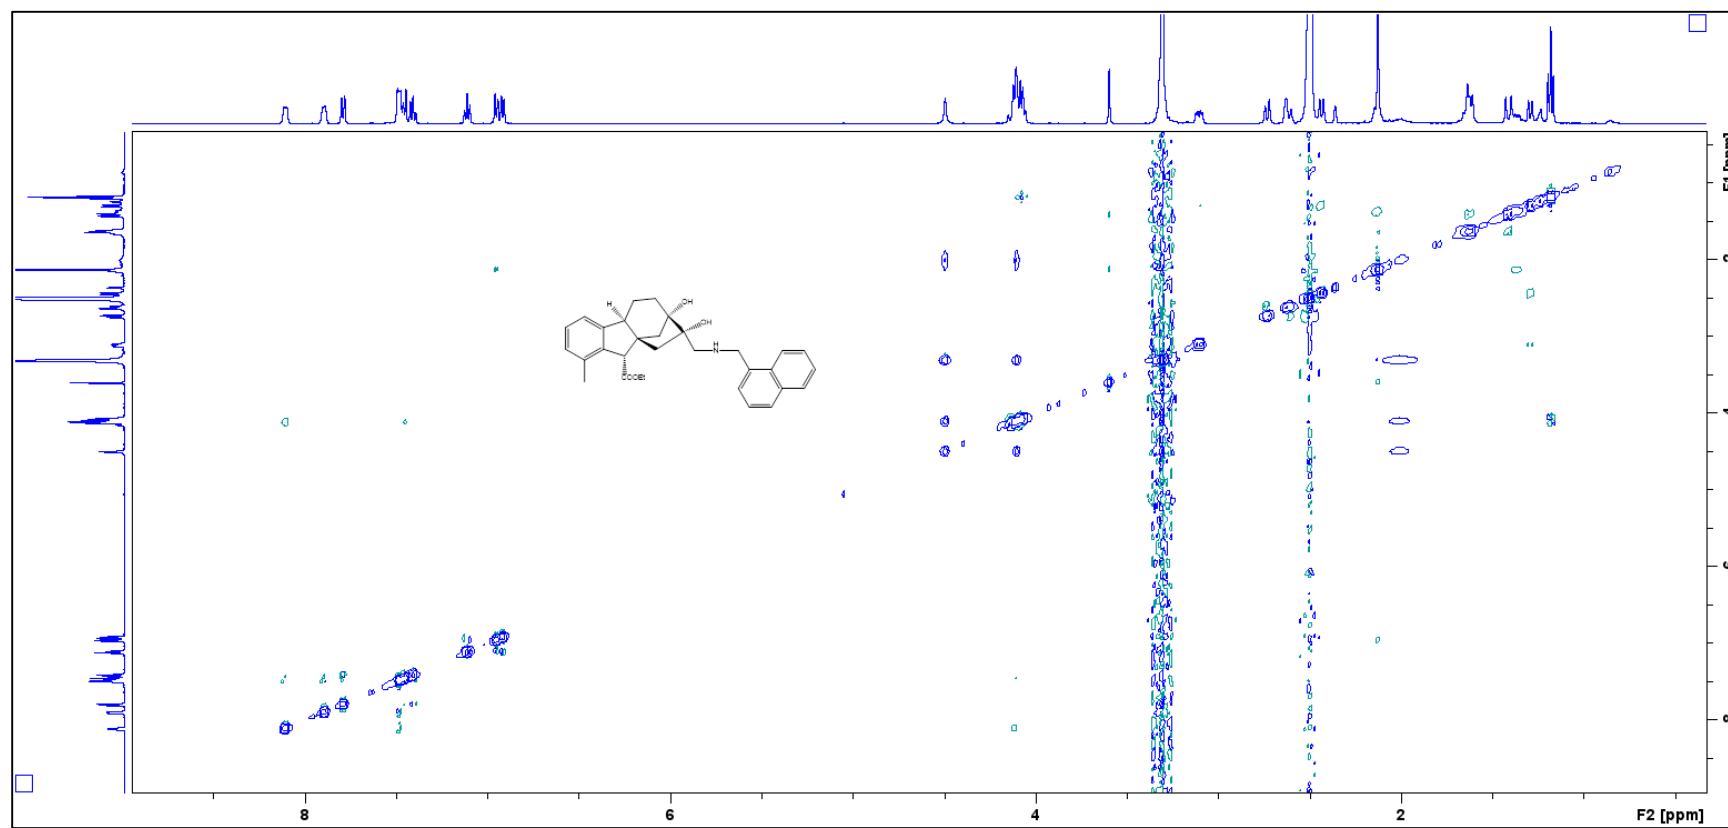

Figure S 93: COSY of compound 38

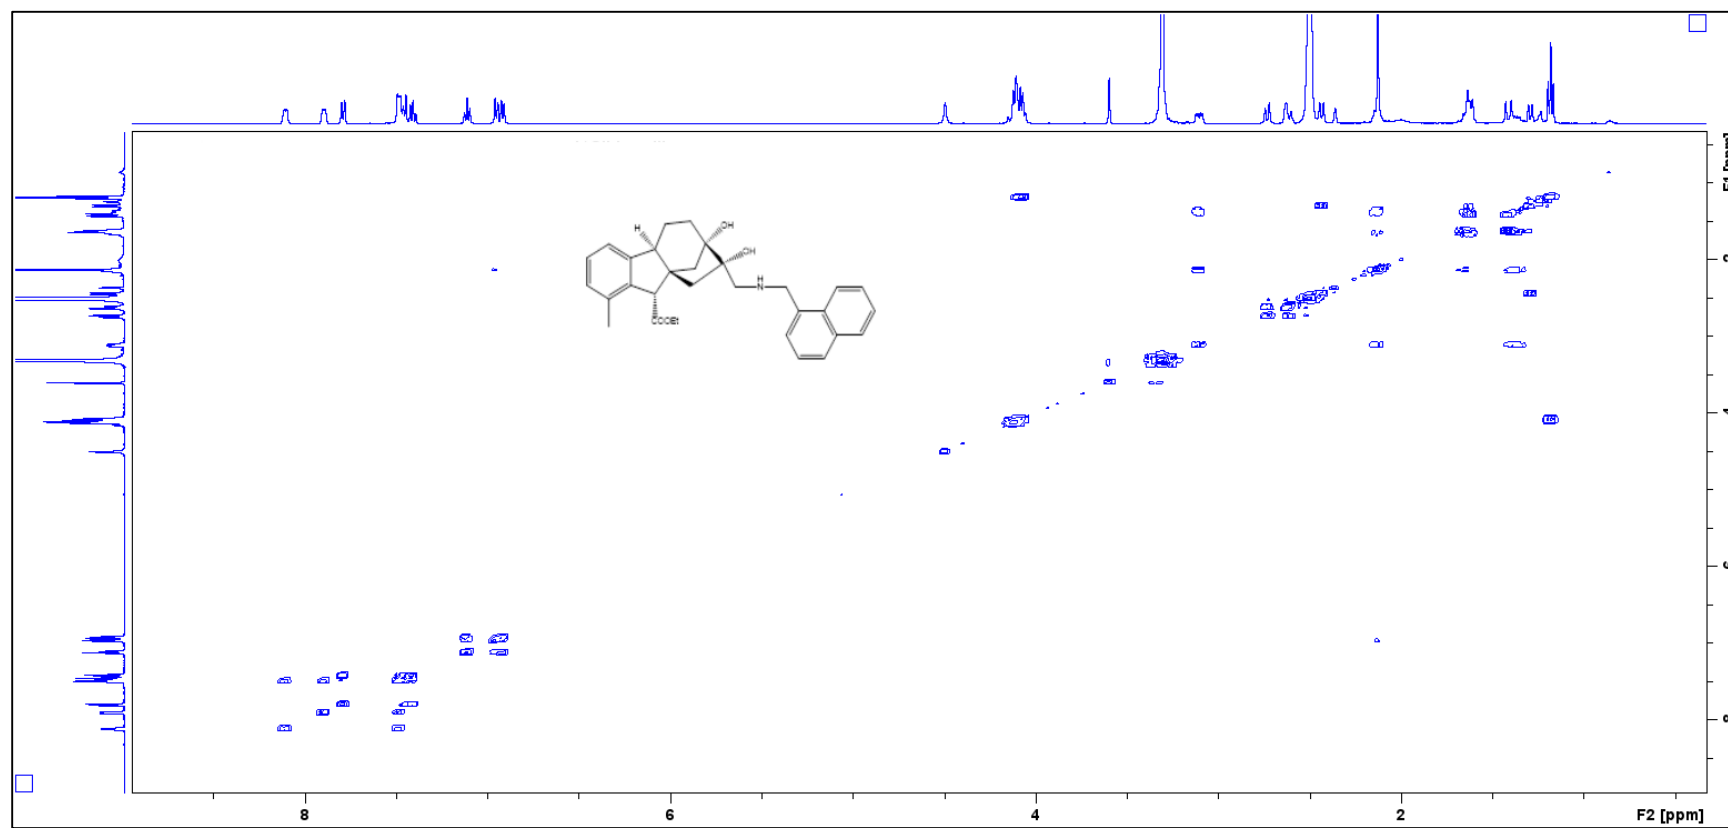

Figure S 94: HSQC of compound 38

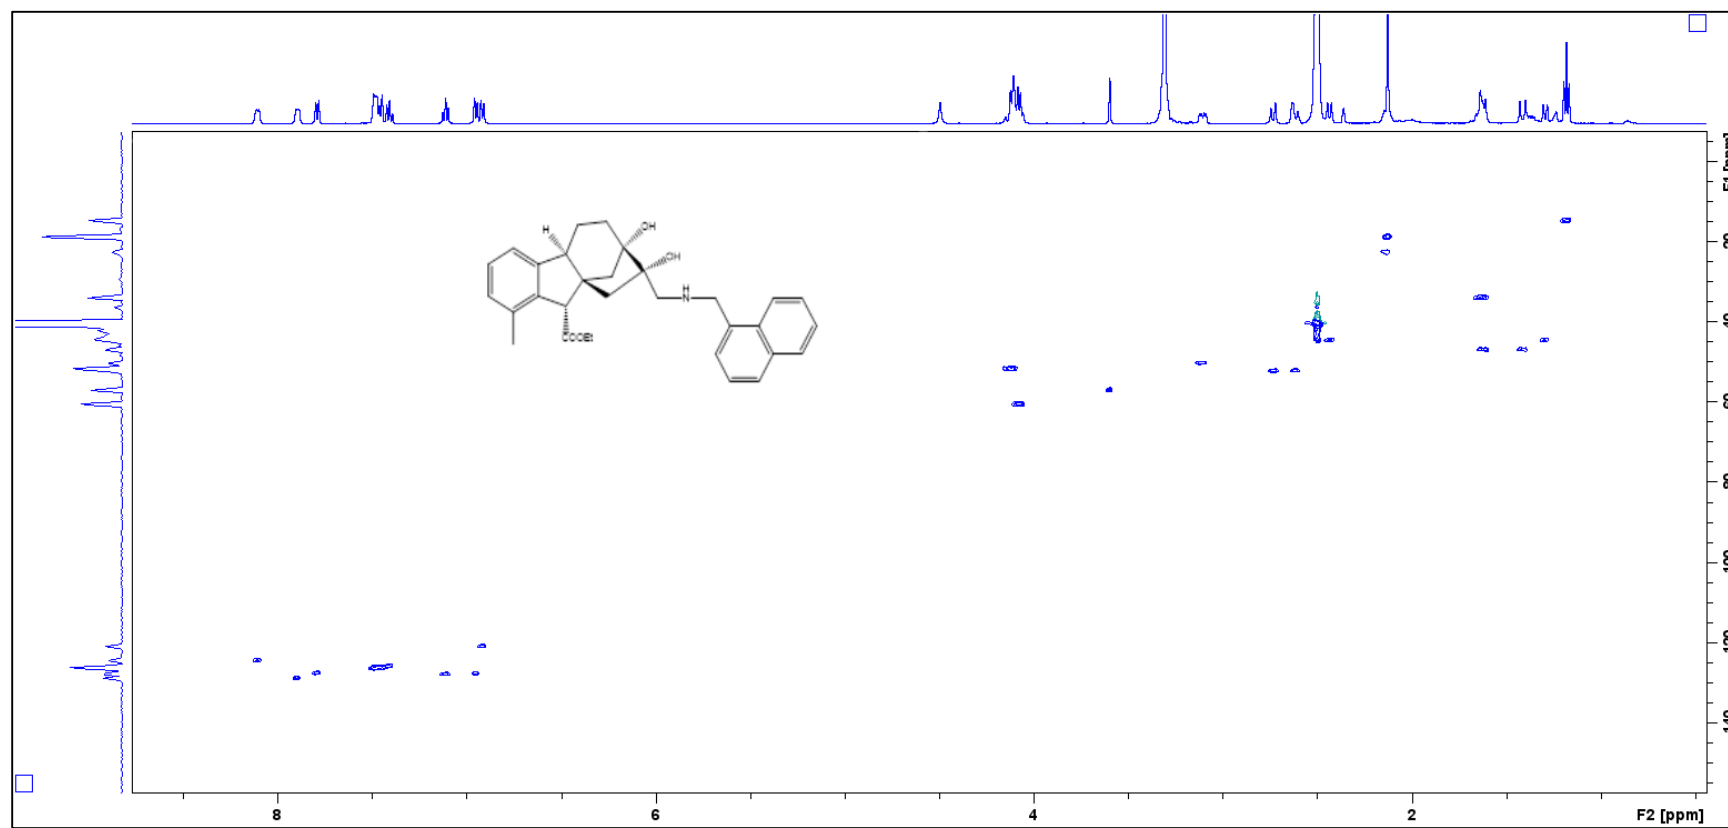

Figure S 95: HMBC of compound 38

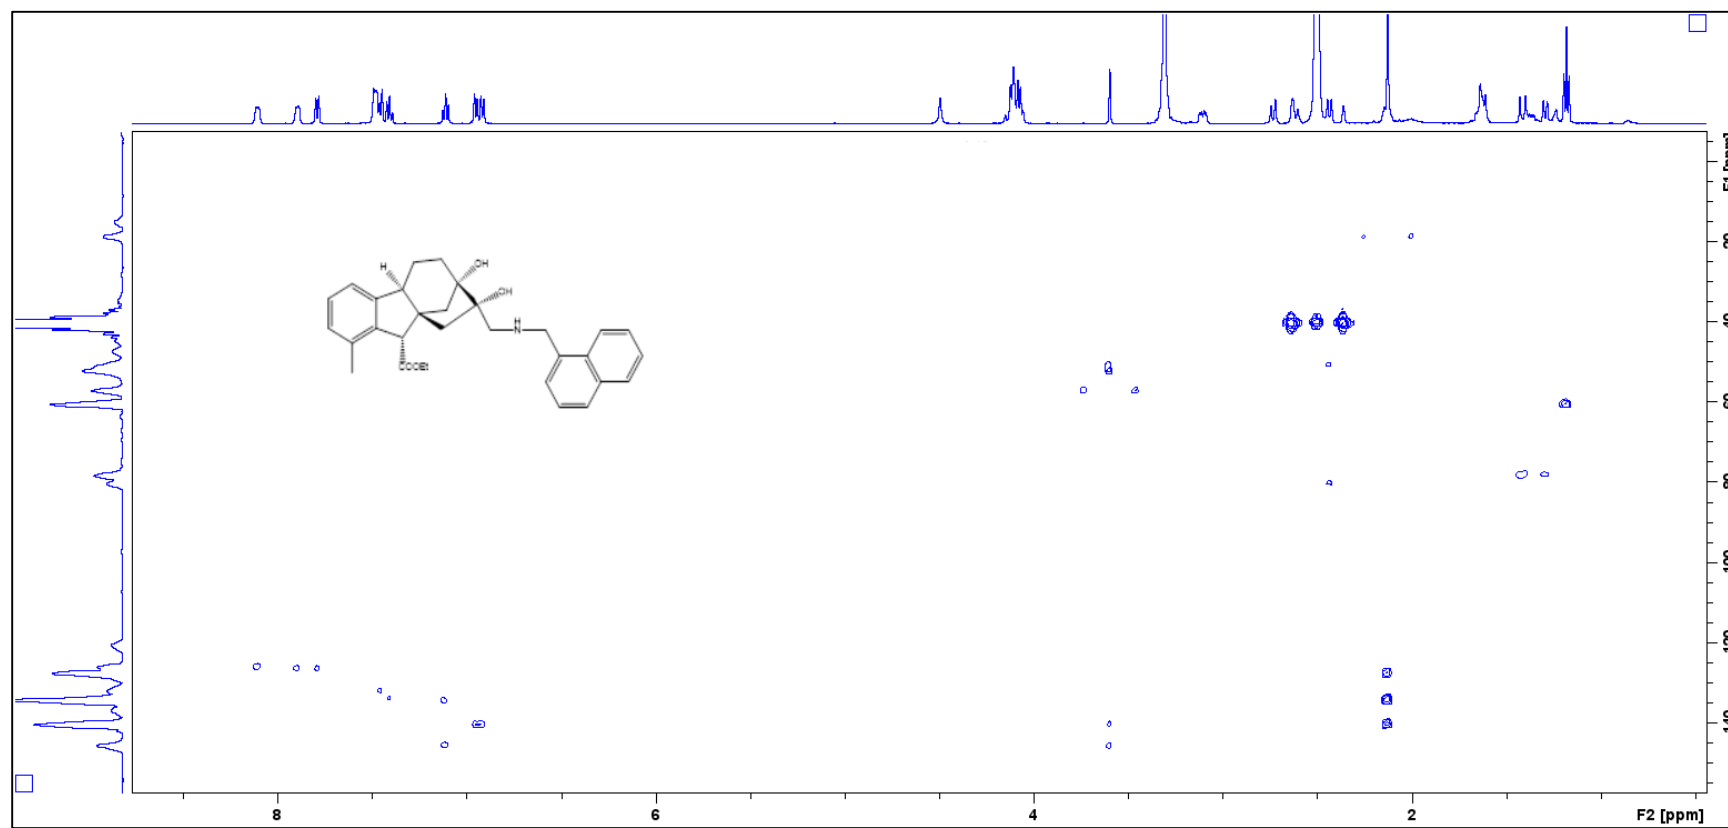

**Table S2: CDocker energy values for compounds 12, 13 and 14**

|    | Pim-1          |                  | AKT            |                  | MAP            |                  | RAFI           |                  | ALK            |                  |
|----|----------------|------------------|----------------|------------------|----------------|------------------|----------------|------------------|----------------|------------------|
|    | CDocker energy | No. interactions |
| 12 | -11.2234       | 1                | -13.4305       | 1                | -23.4897       | 0                | -16.4574       | 0                | -43.4401       | 8                |
| 13 | -9.1276        | 0                | -10.7763       | 1                | -21.4457       | 0                | -14.6789       | 1                | -46.6684       | 5                |
| 14 | -10.8743       | 0                | -9.7745        | 0                | -19.7651       | 0                | -15.6872       | 0                | -45.2367       | 5                |

**Figure S 96: Plot of Polar Surface Area (PSA) vs. LogP for a standard and test set showing the 95% and 99% confidence limit ellipses corresponding to the Blood Brain Barrier and Intestinal Absorption models of compounds 12, 13 and 14**

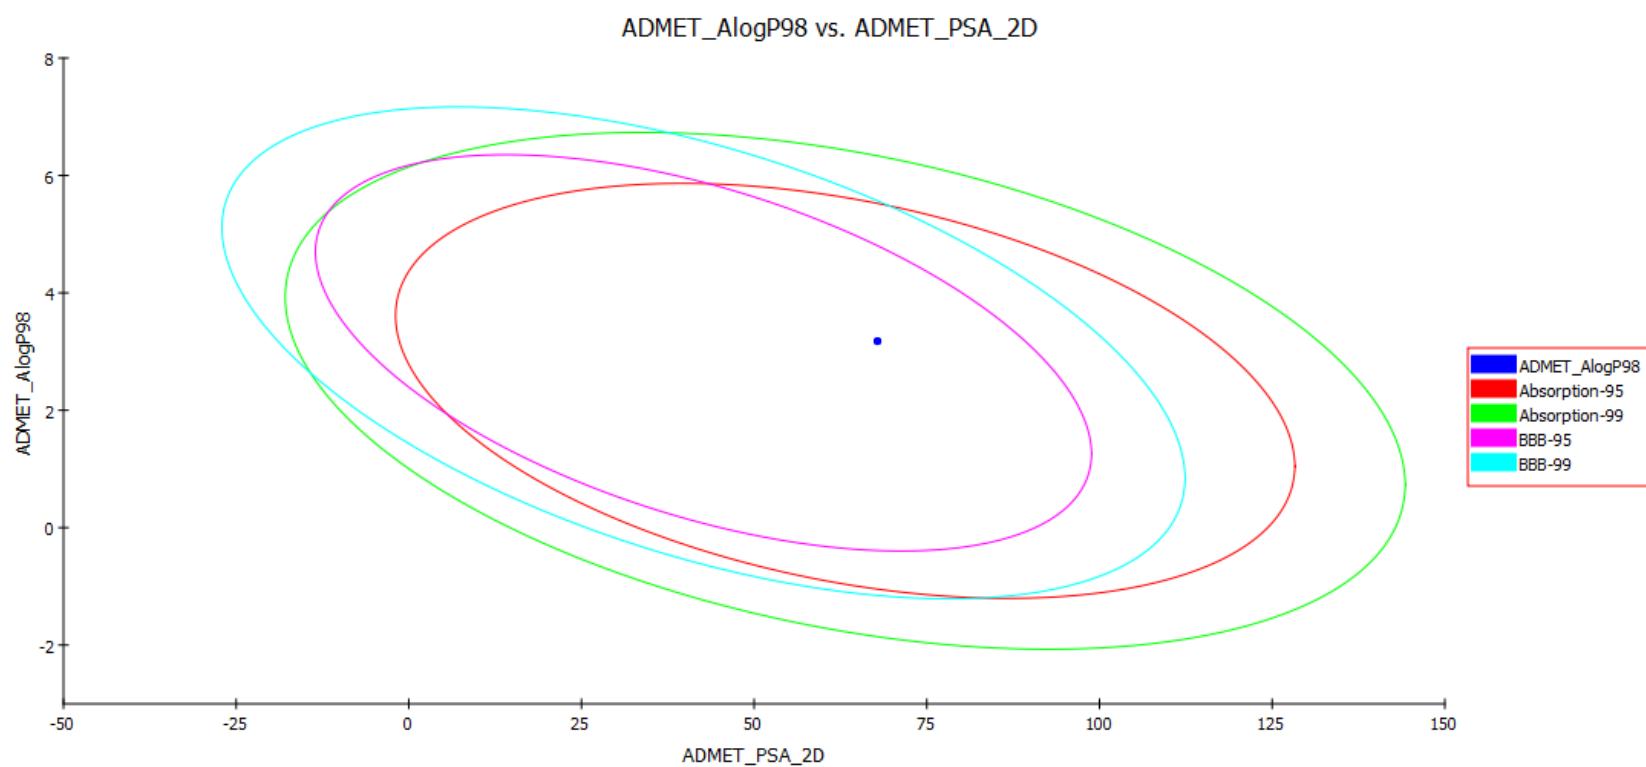

**Table S3: *In silico* ADMET properties**

| Compounds | <i>In silico</i> ADMET properties |                  |                  |                   |             |
|-----------|-----------------------------------|------------------|------------------|-------------------|-------------|
|           | BBB level                         | Absorption level | Solubility level | CYP2D6 inhibition | PPB level   |
| 12        | 2<br>(medium)                     | 0<br>(good)      | 2<br>(low)       | 0 (non-inhibitor) | 1<br>(>90%) |
| 13        | 2<br>(medium)                     | 0<br>(good)      | 2<br>(low)       | 0 (non-inhibitor) | 2<br>(>95%) |
| 14        | 2<br>(medium)                     | 0<br>(good)      | 2<br>(low)       | 0 (non-inhibitor) | 2<br>(>95%) |
